# Supplementary figures and images for: C-2 auxiliaries for stereoselective glycosylation based on common additive functional groups
Source: Royal Society of Chemistry journal article supplement (doi:10.1039/c9ob02700a), 2020-01-01

Supporting information

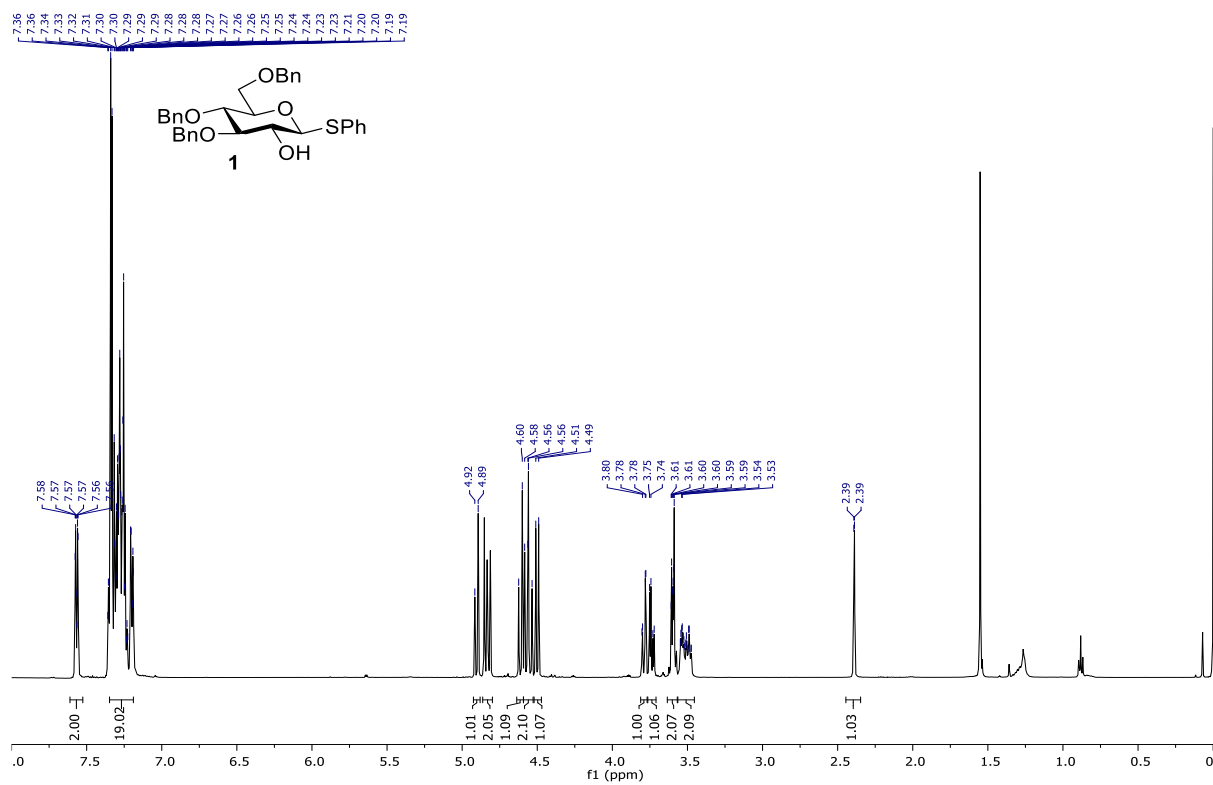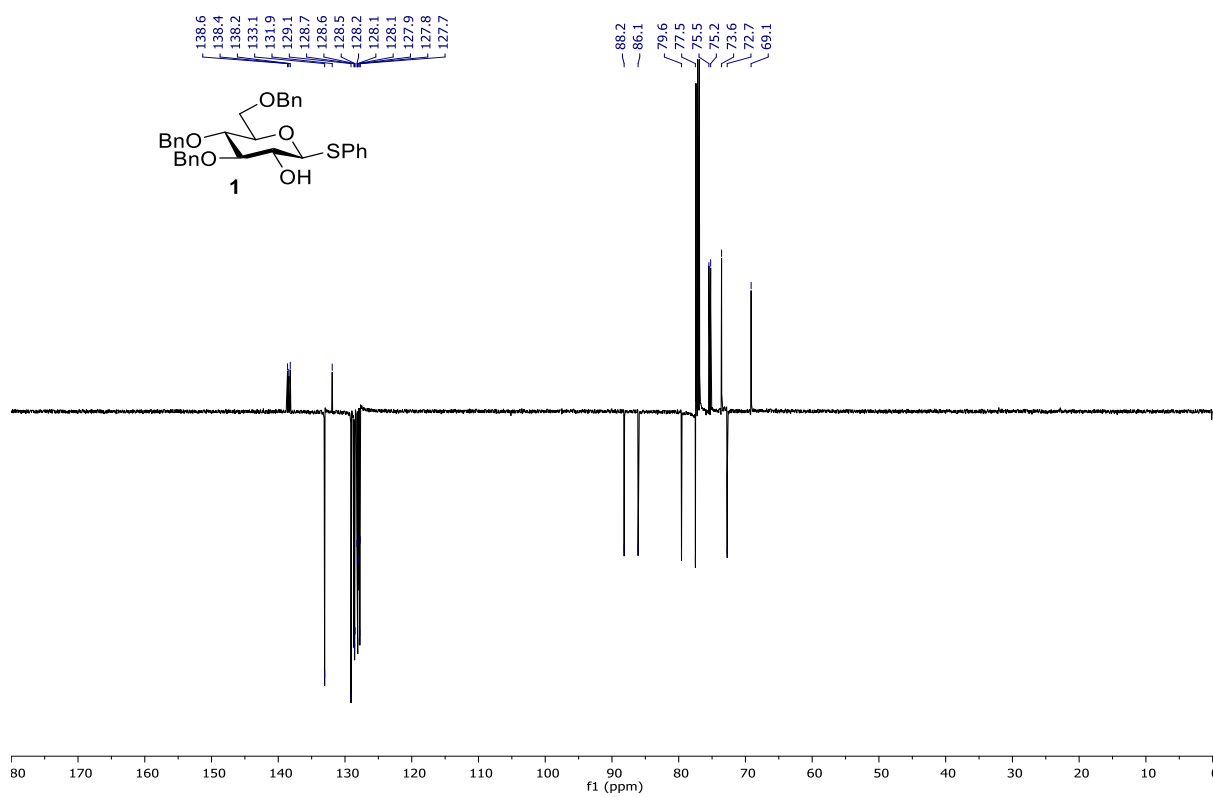

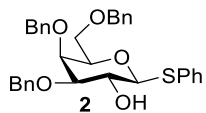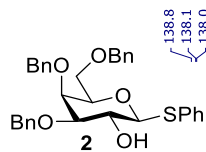

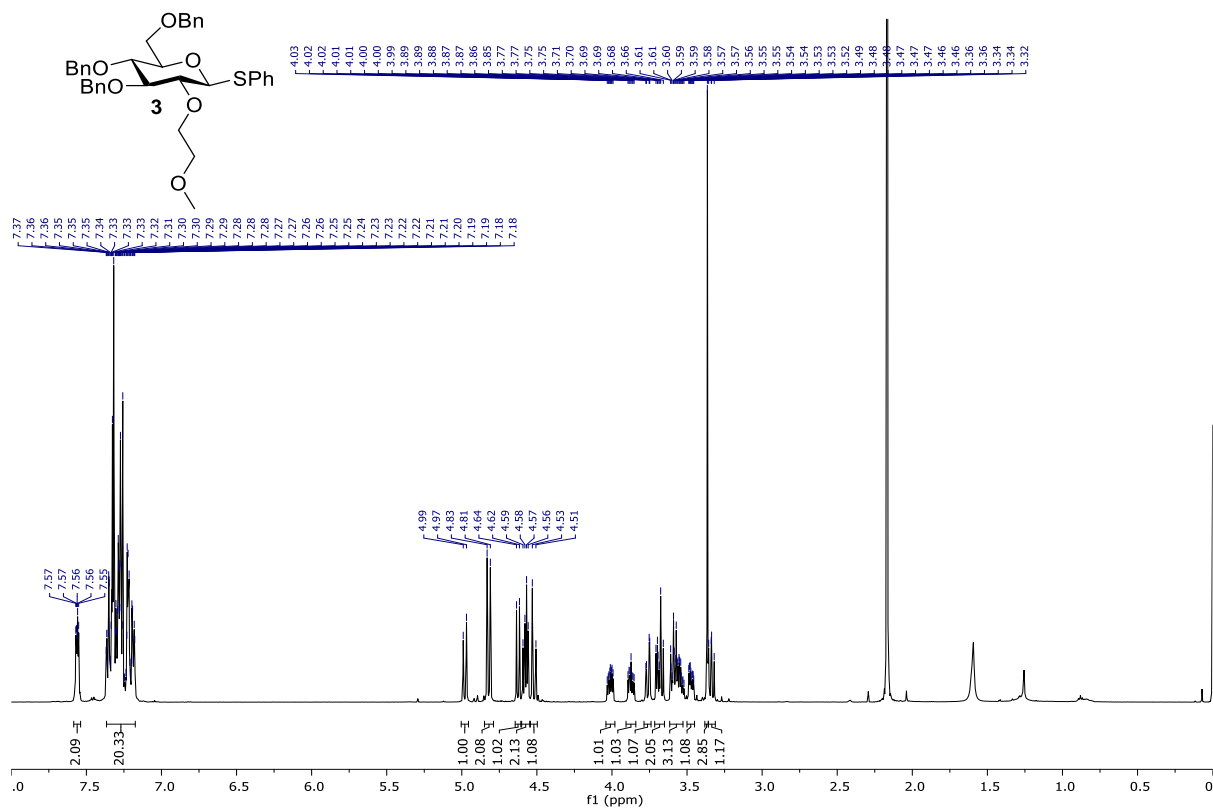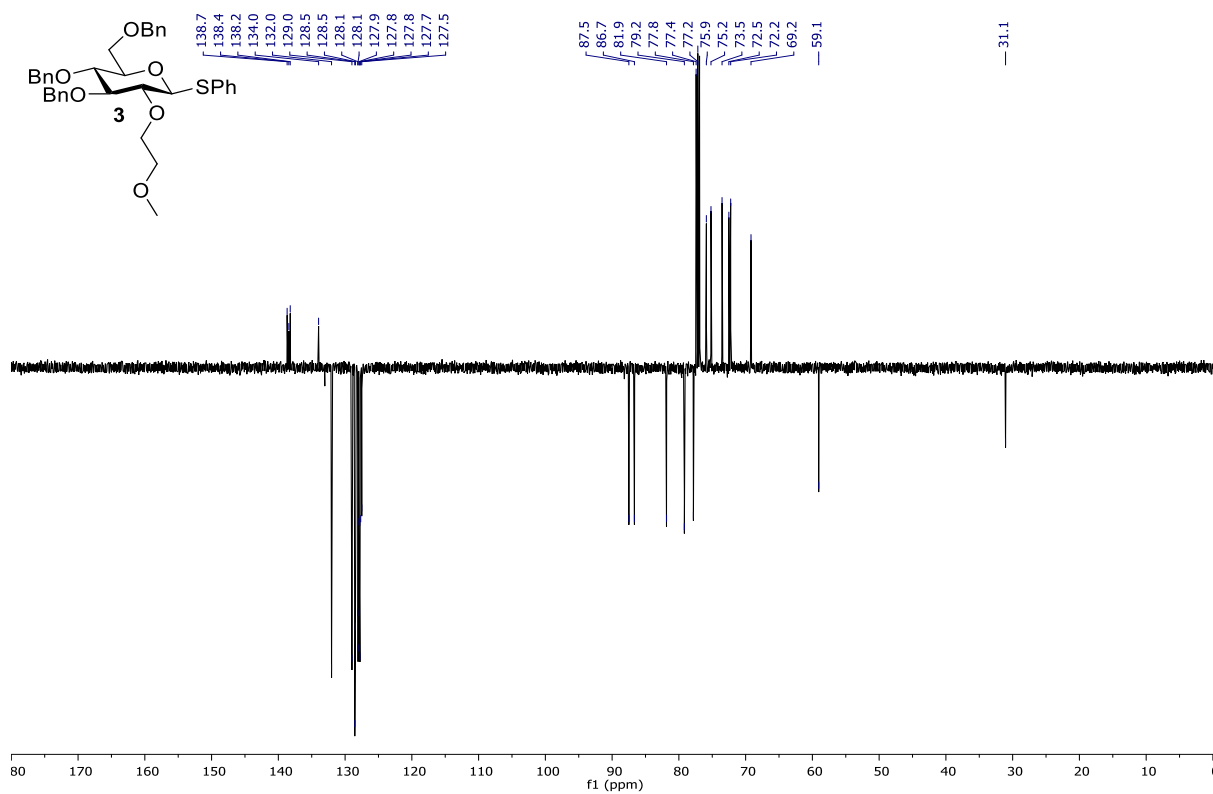



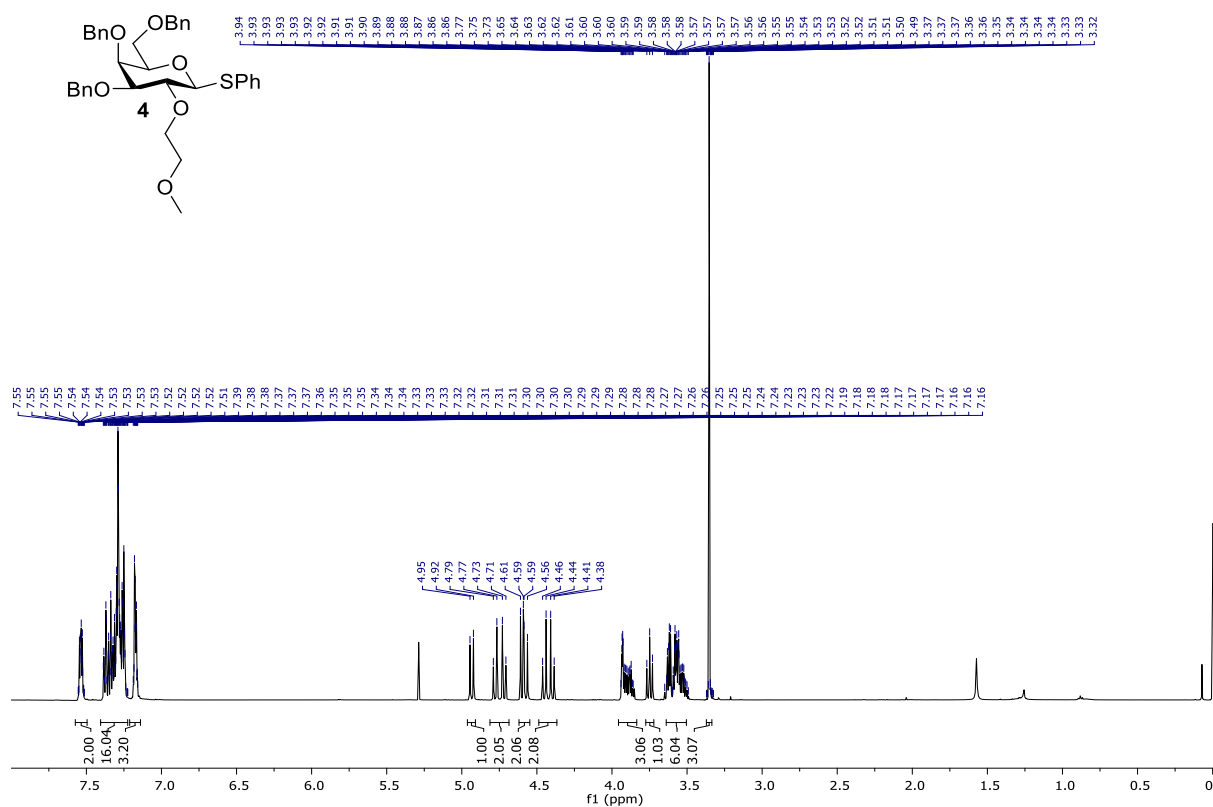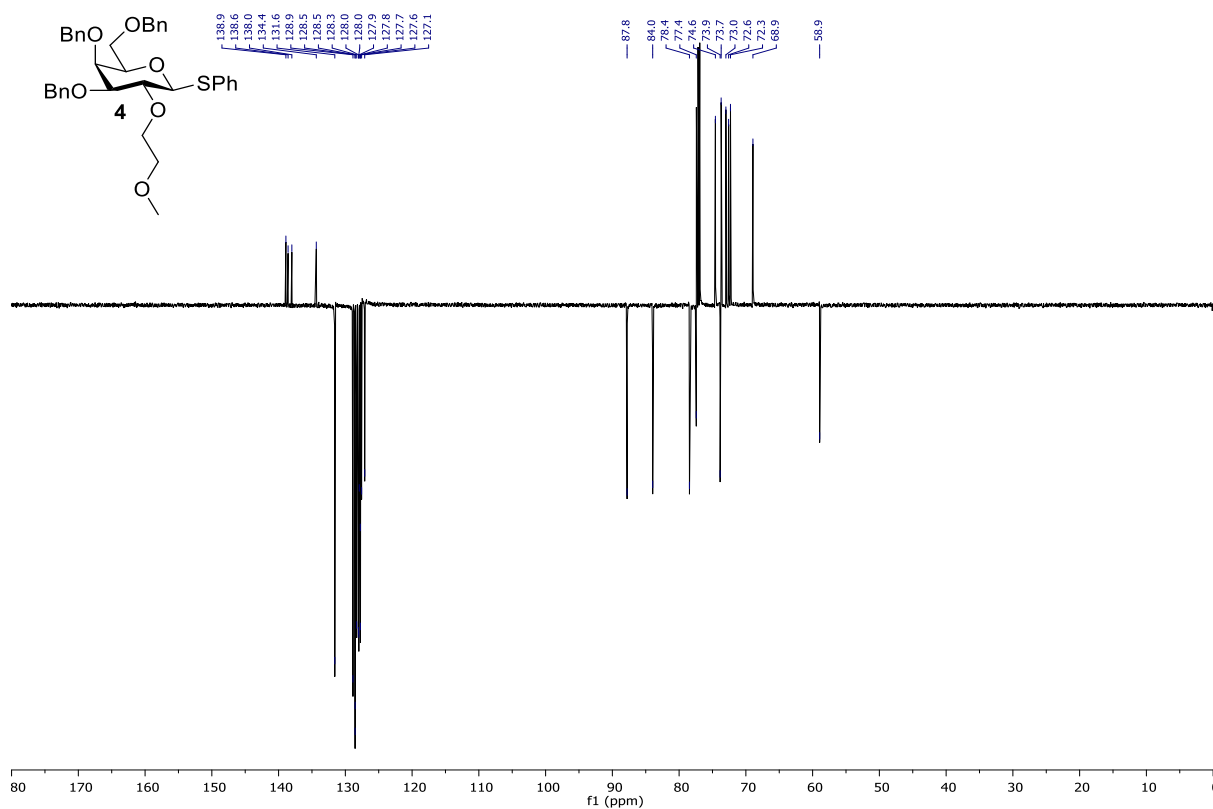

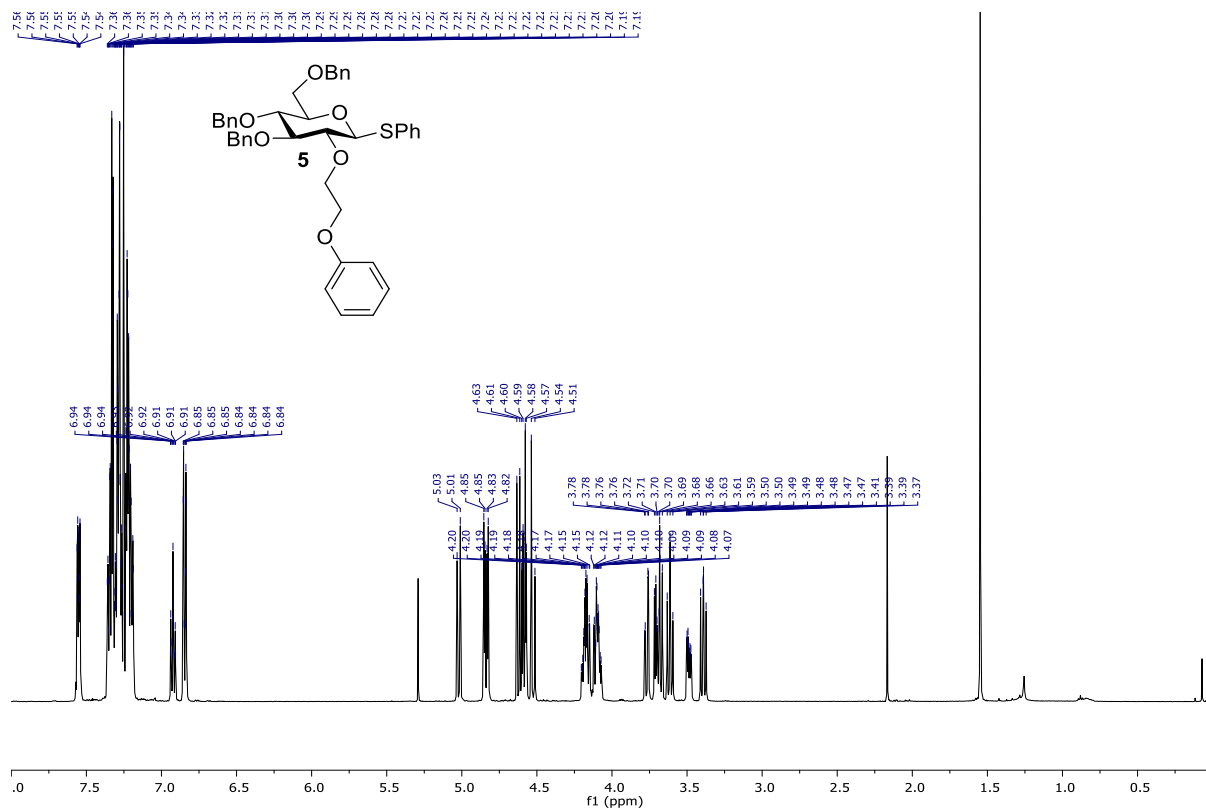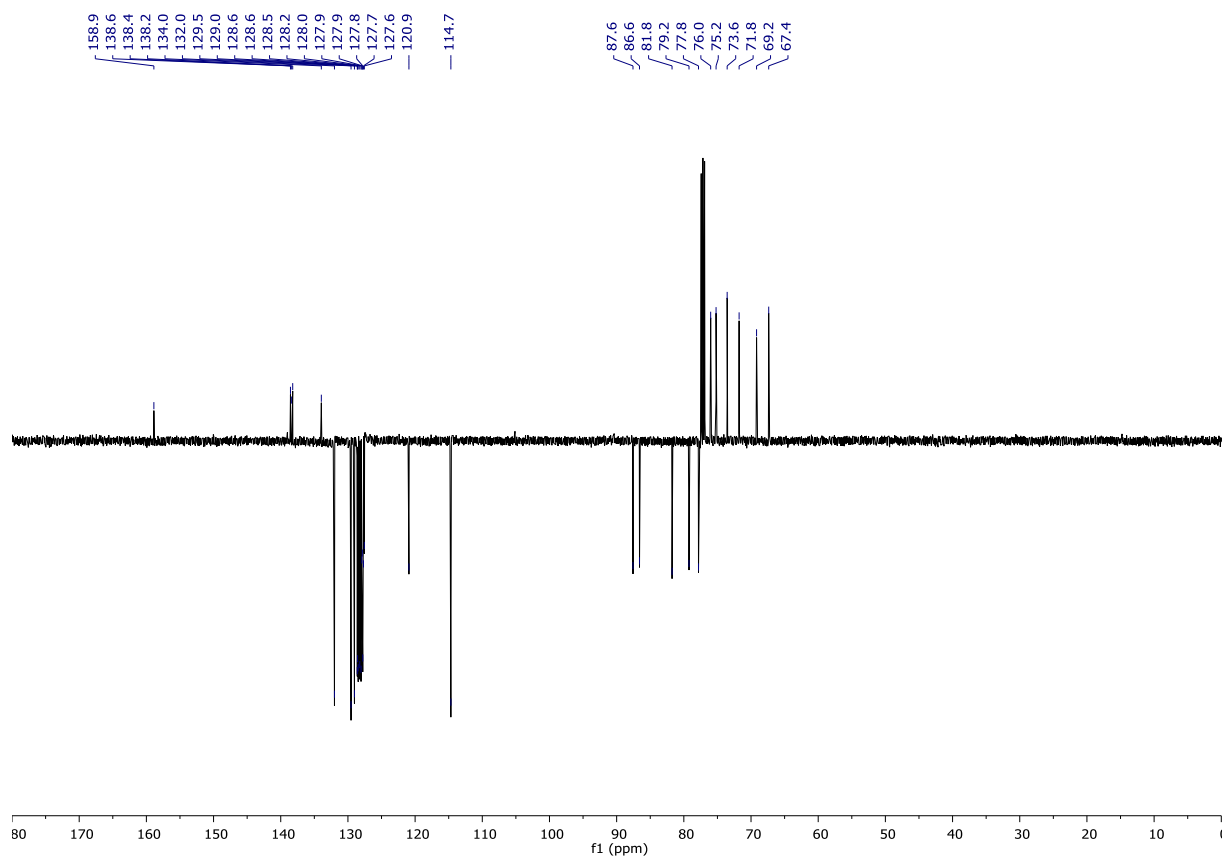

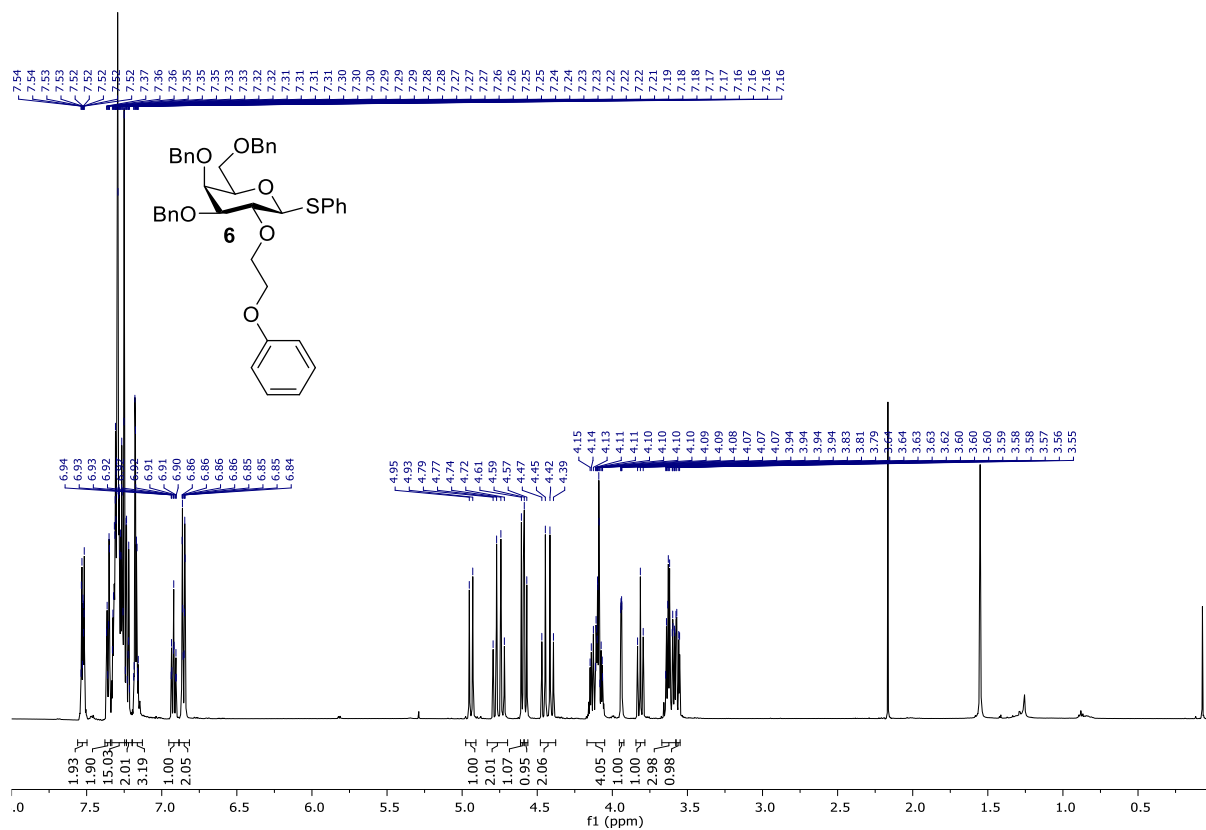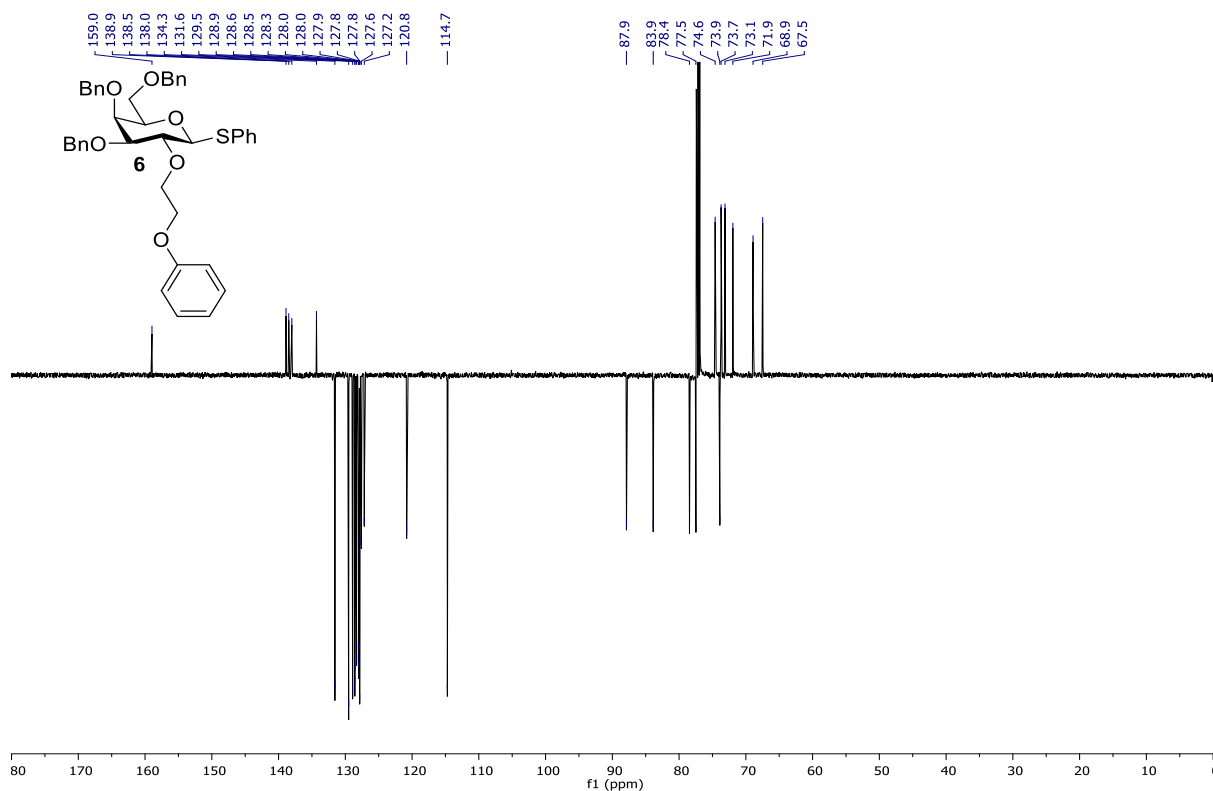

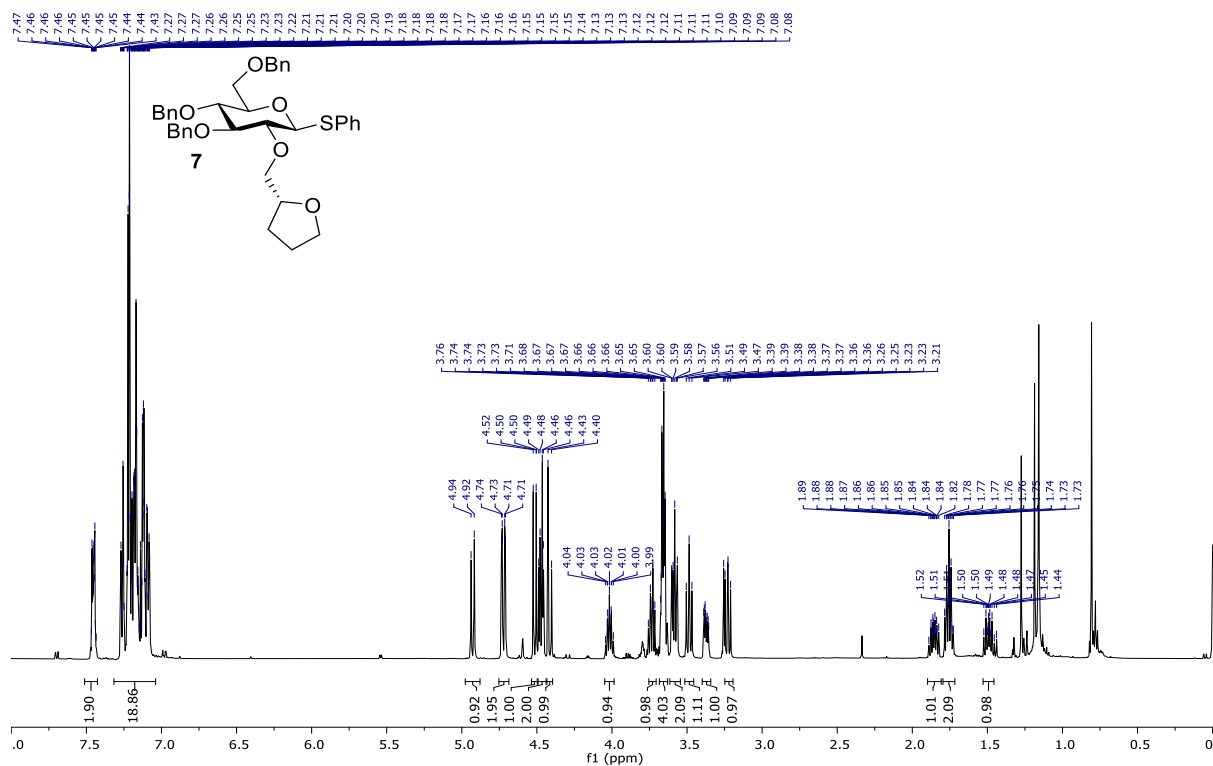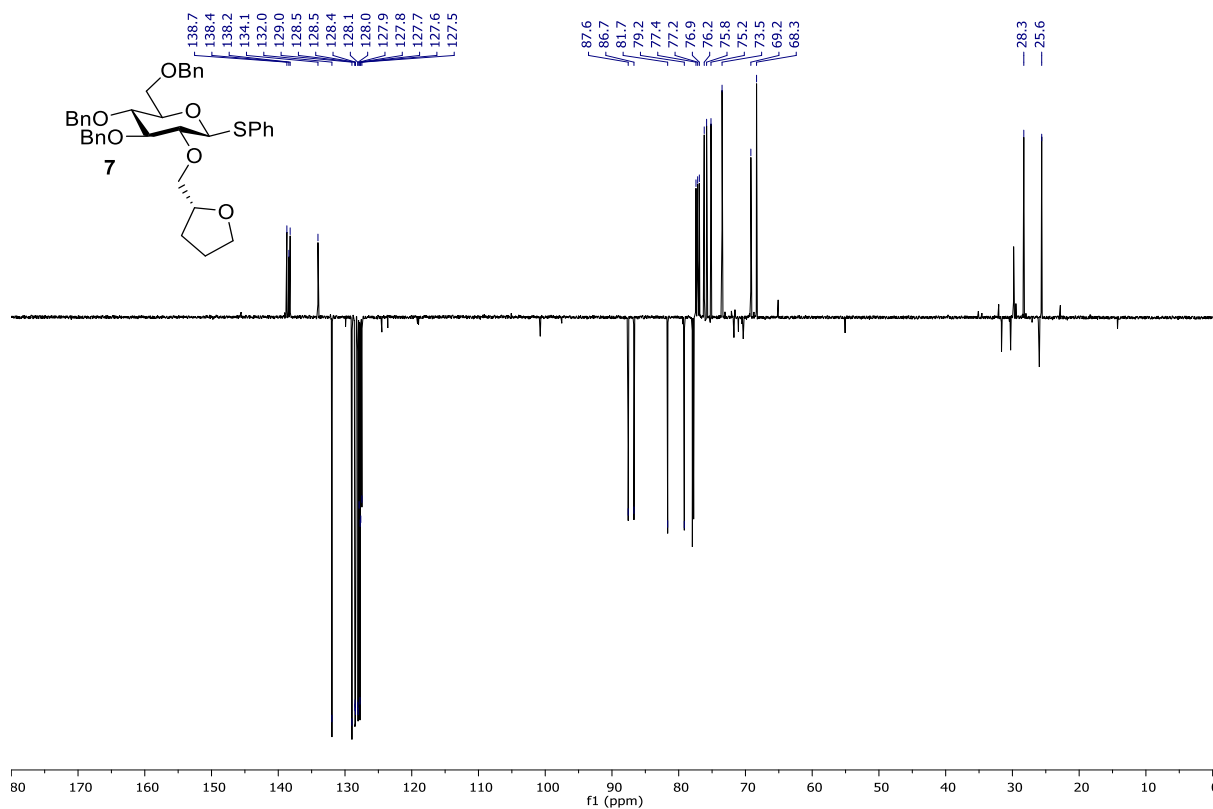

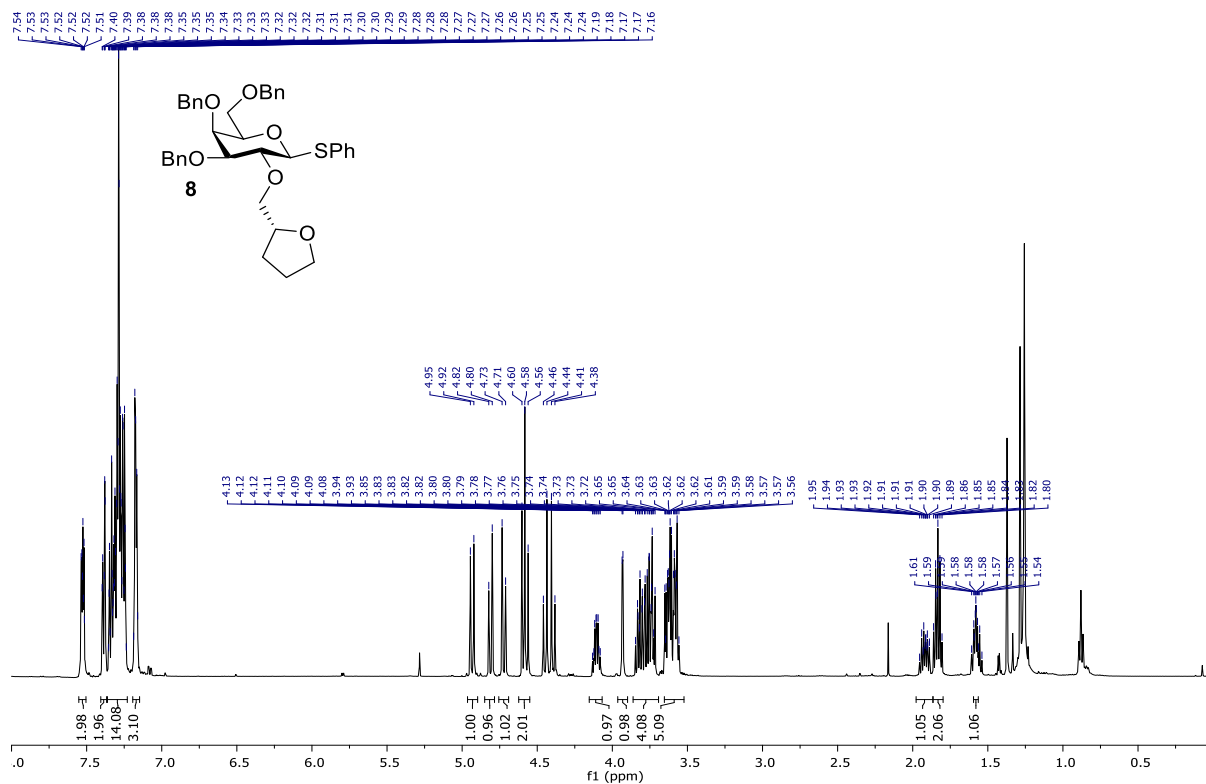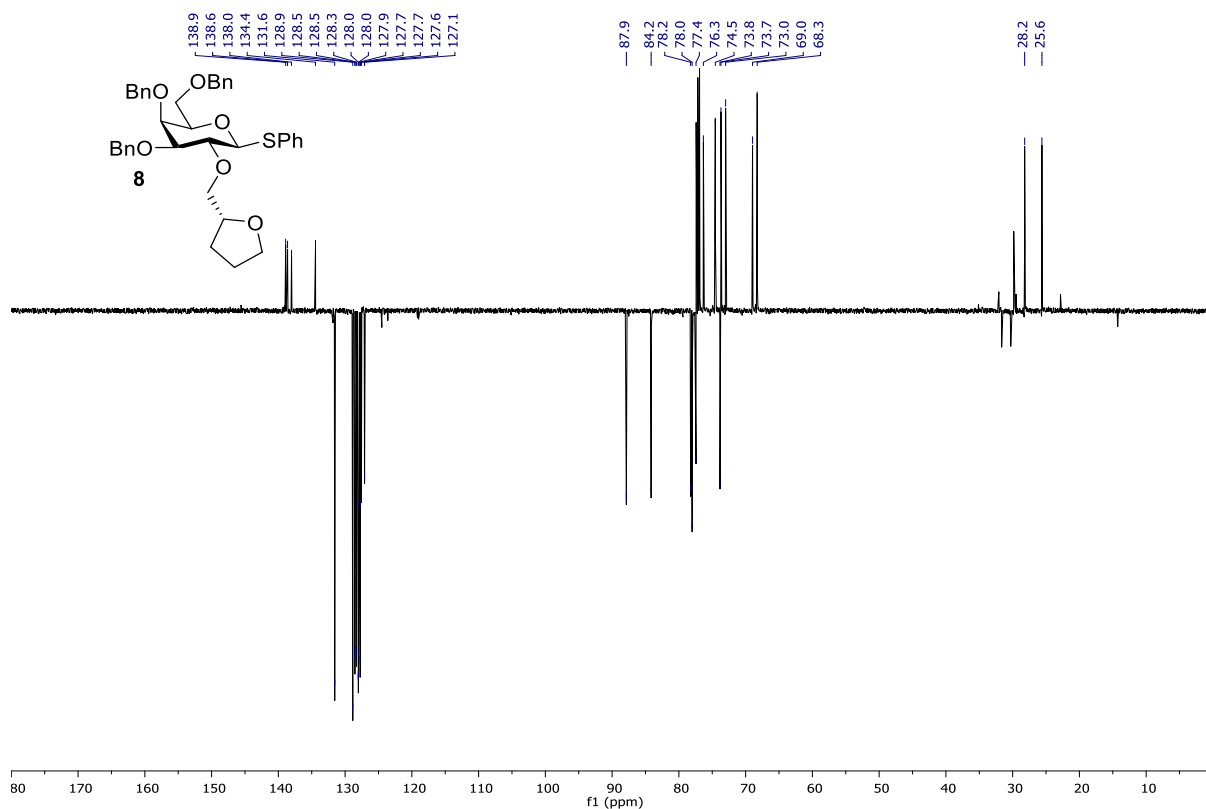

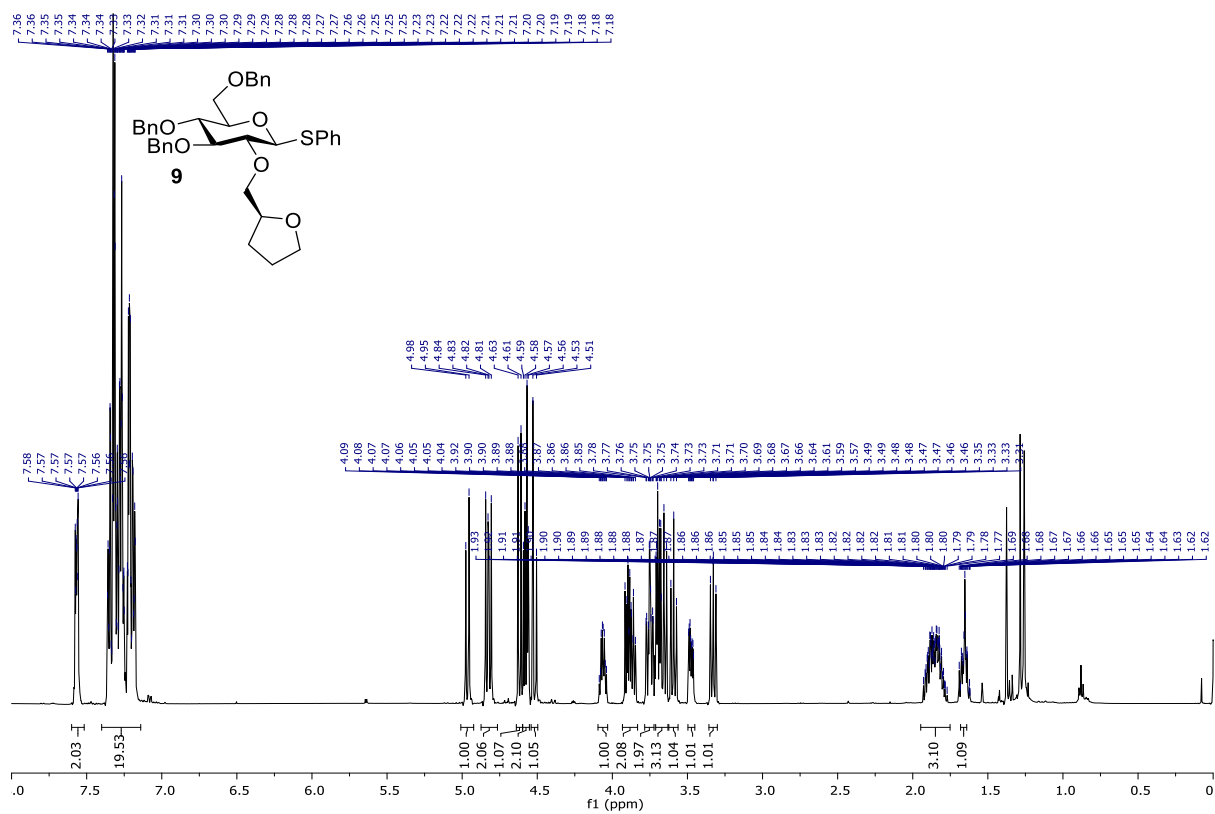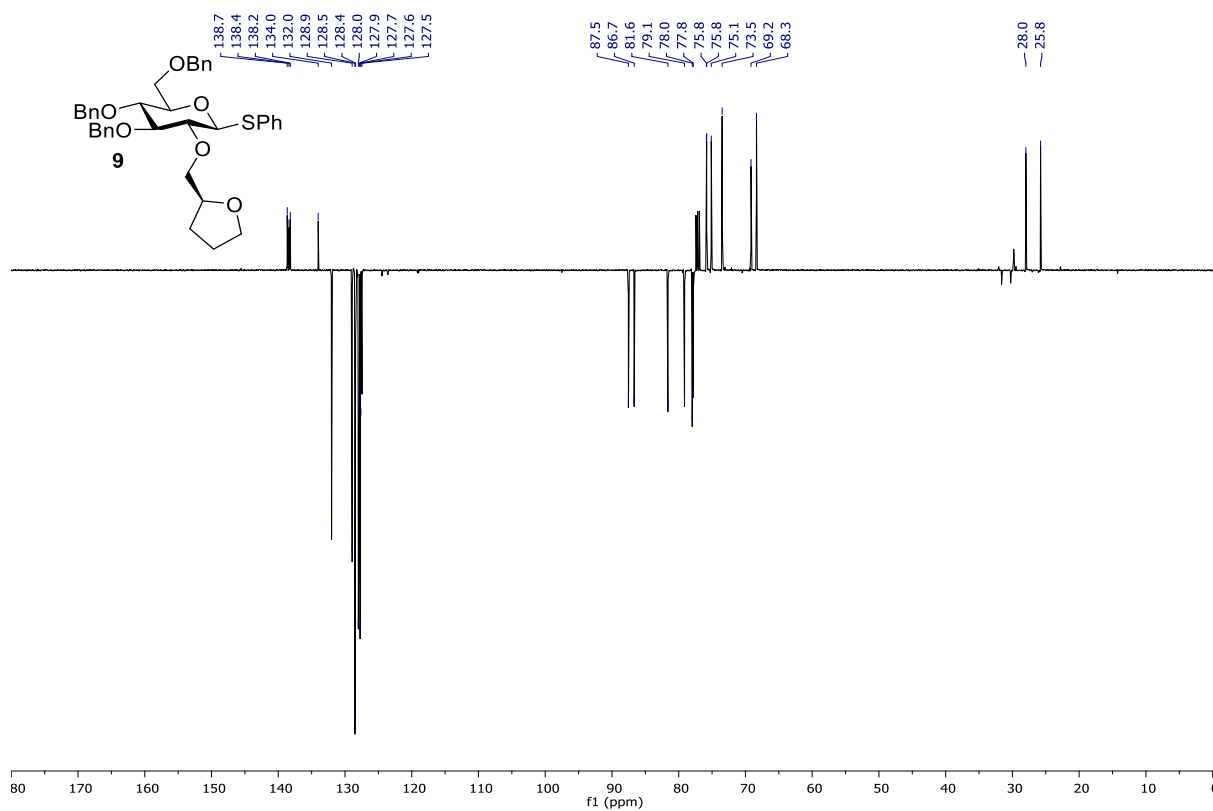



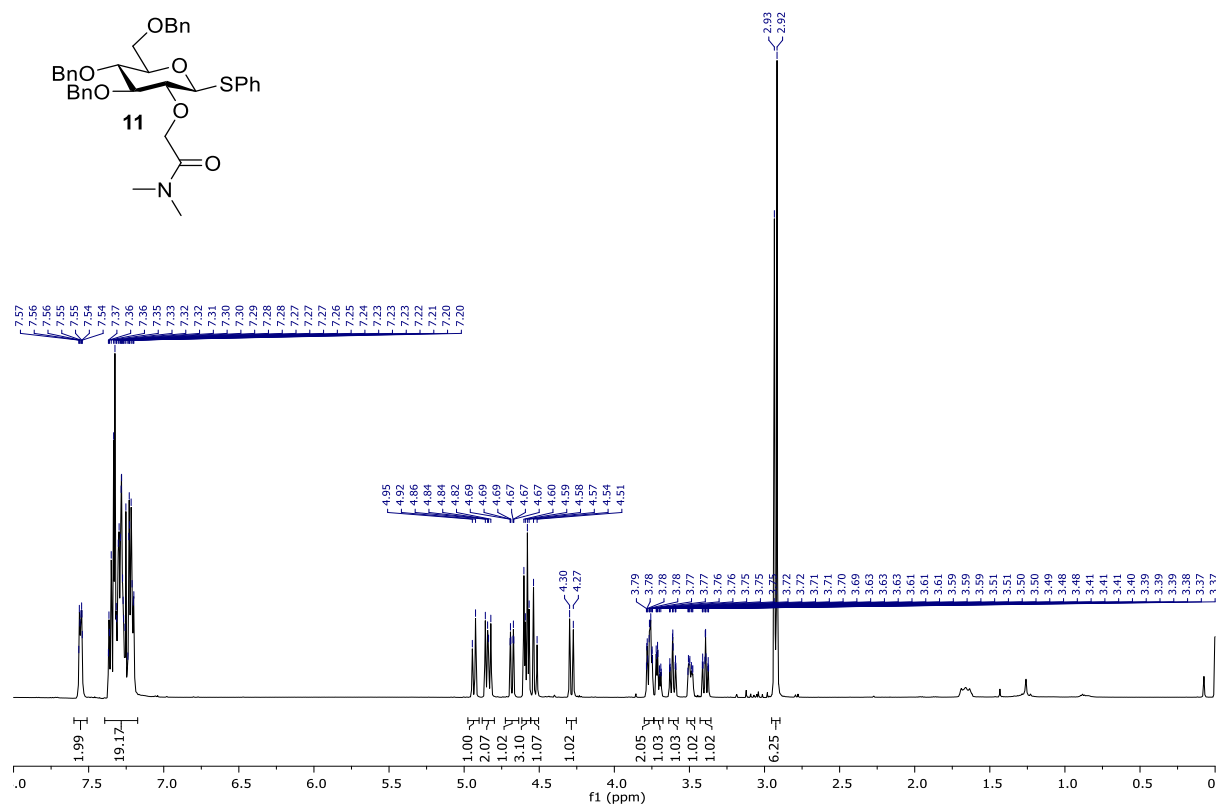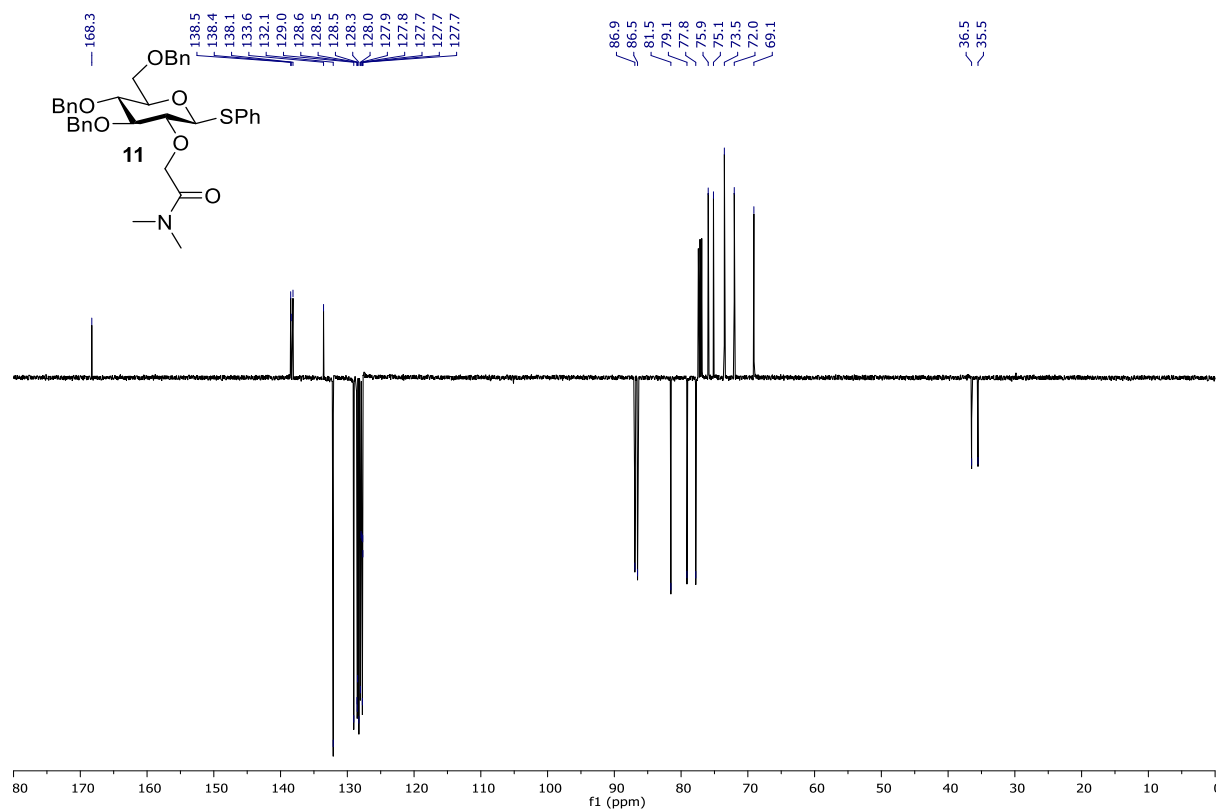



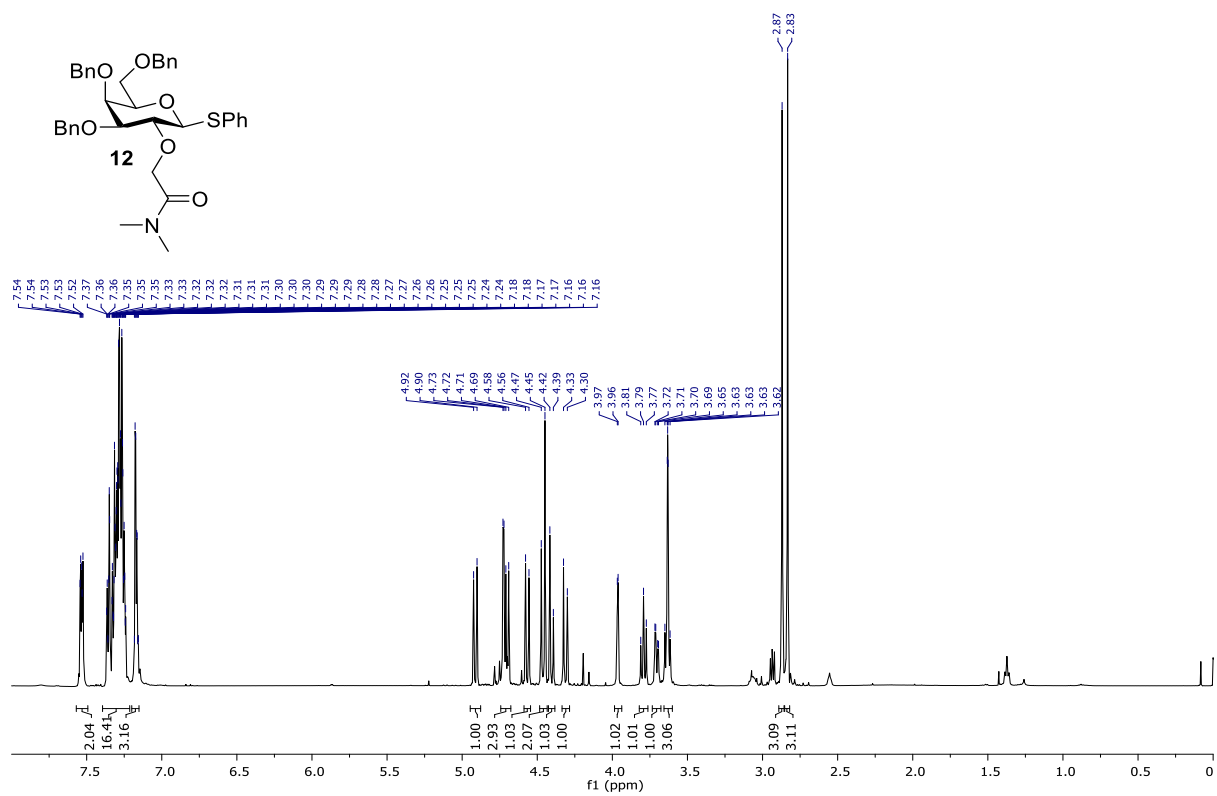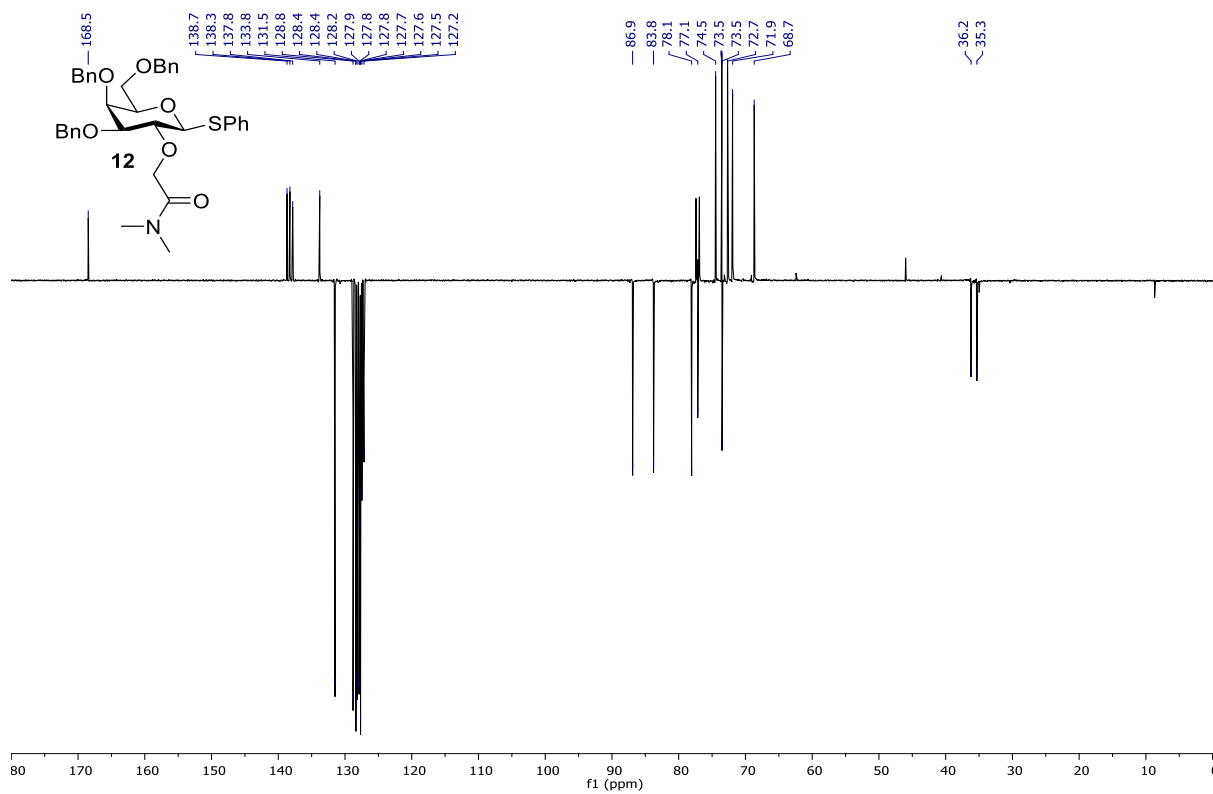

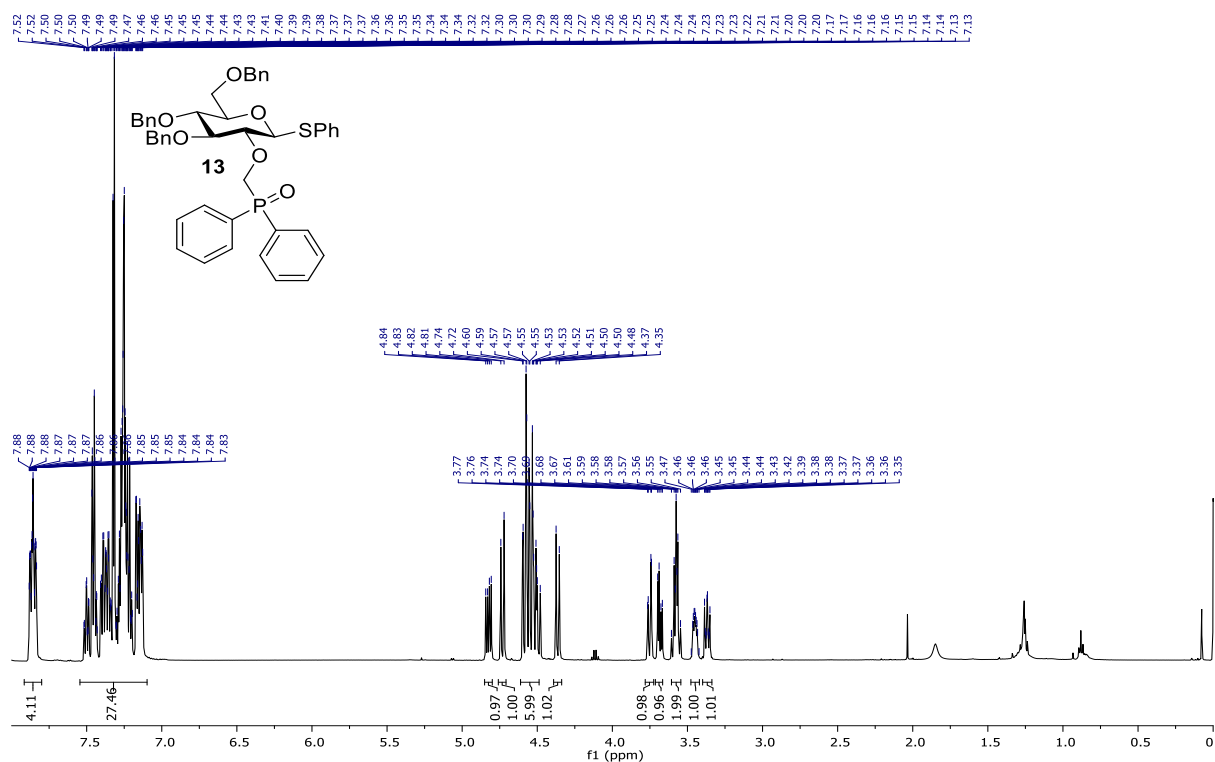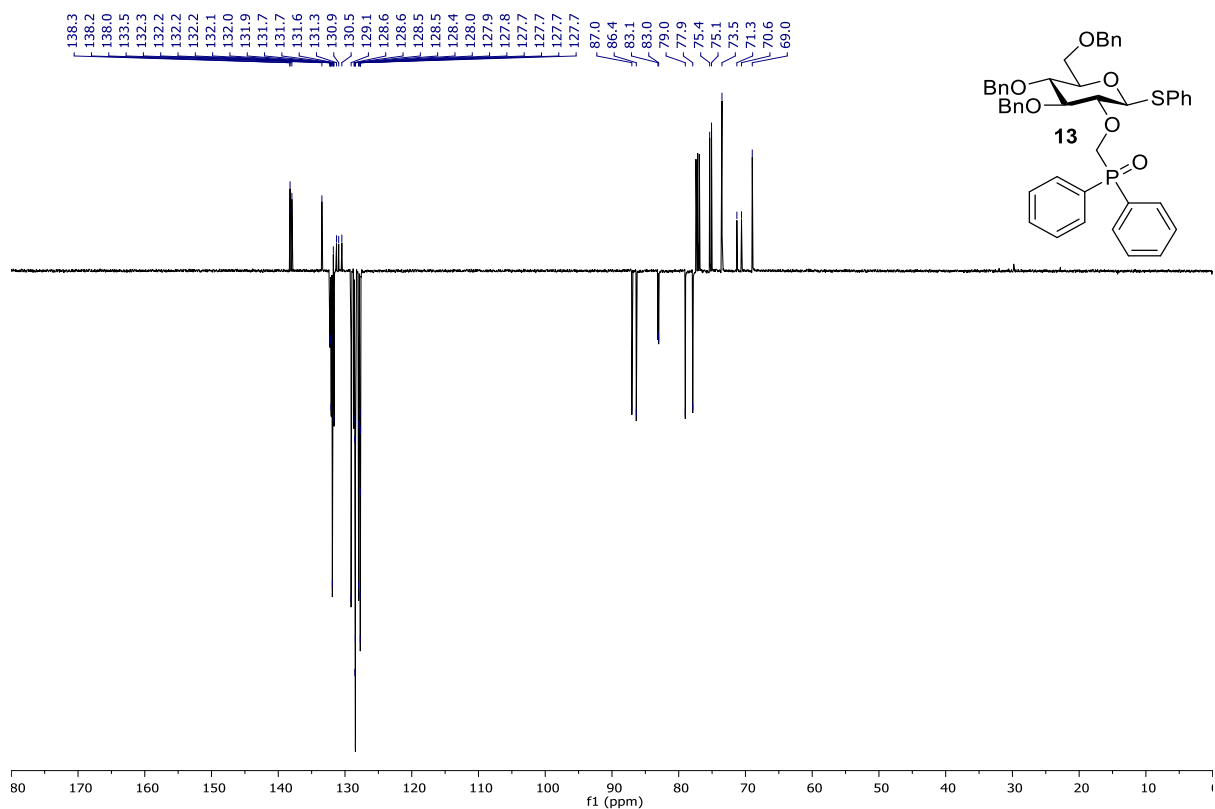

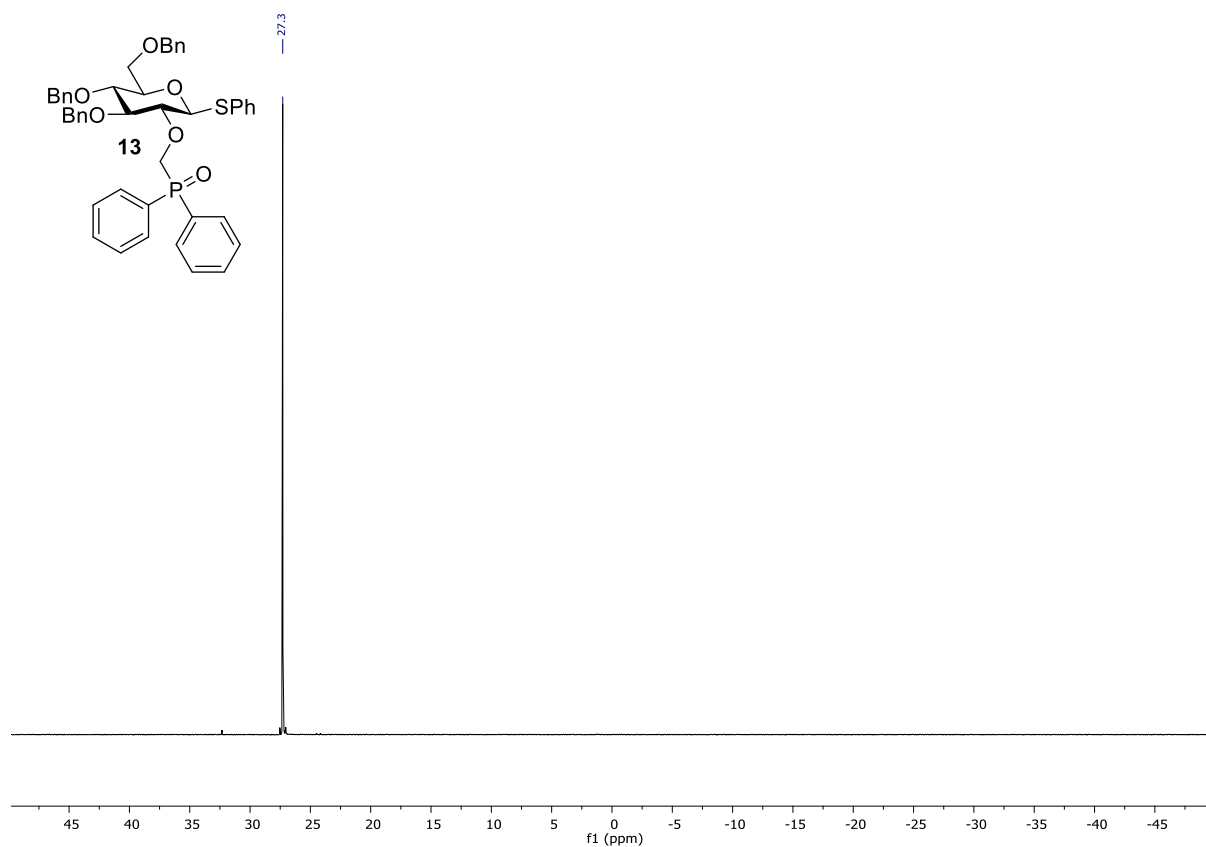

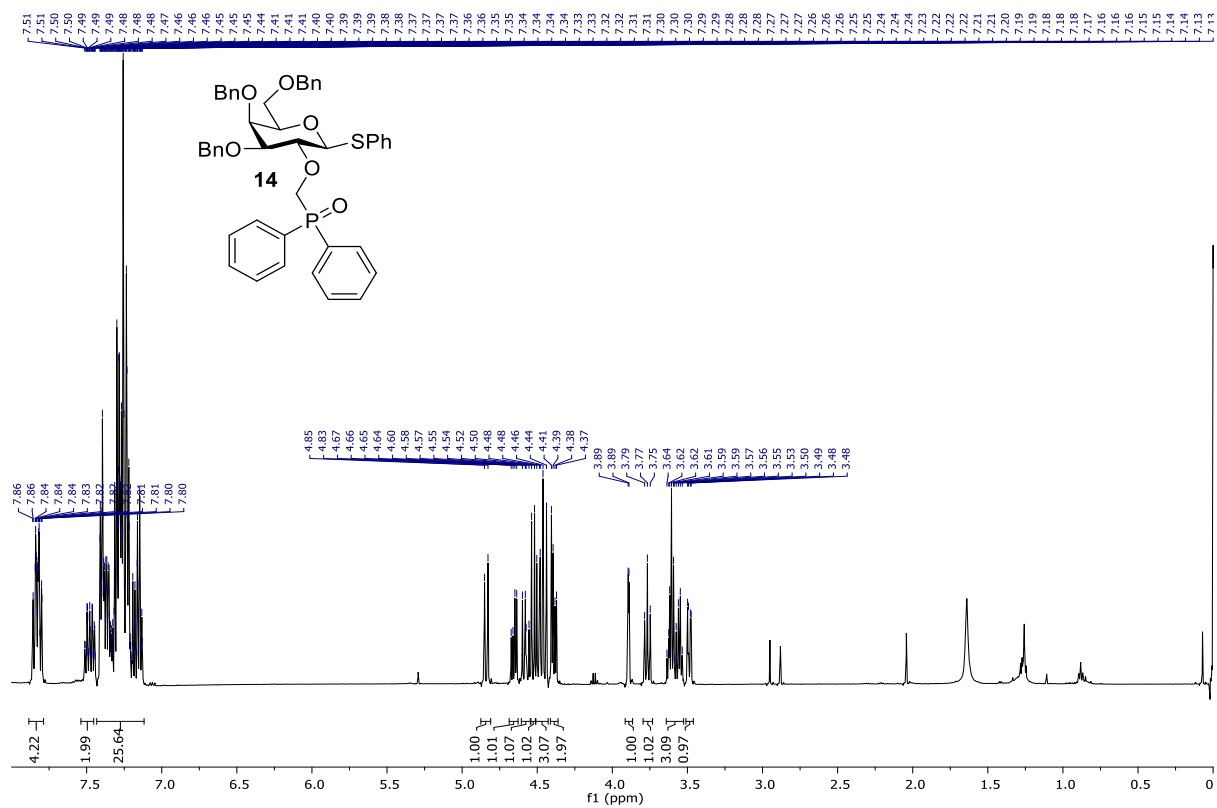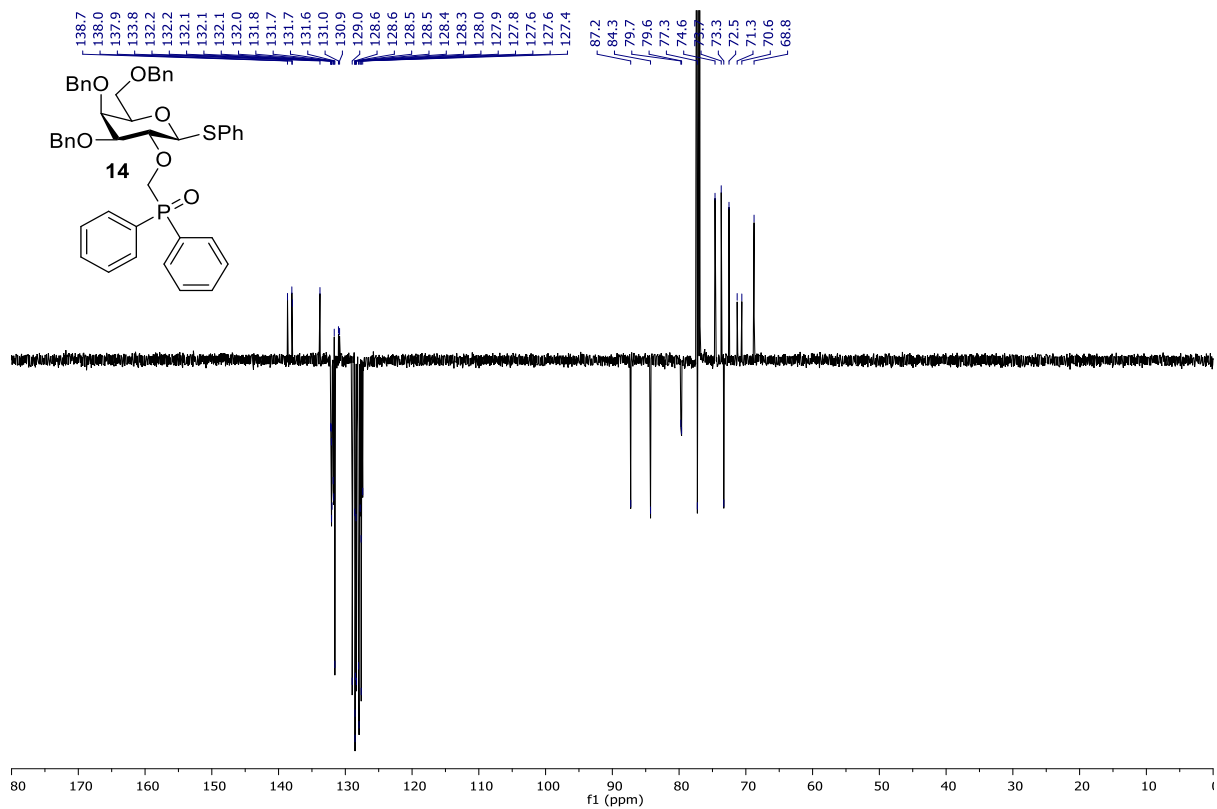

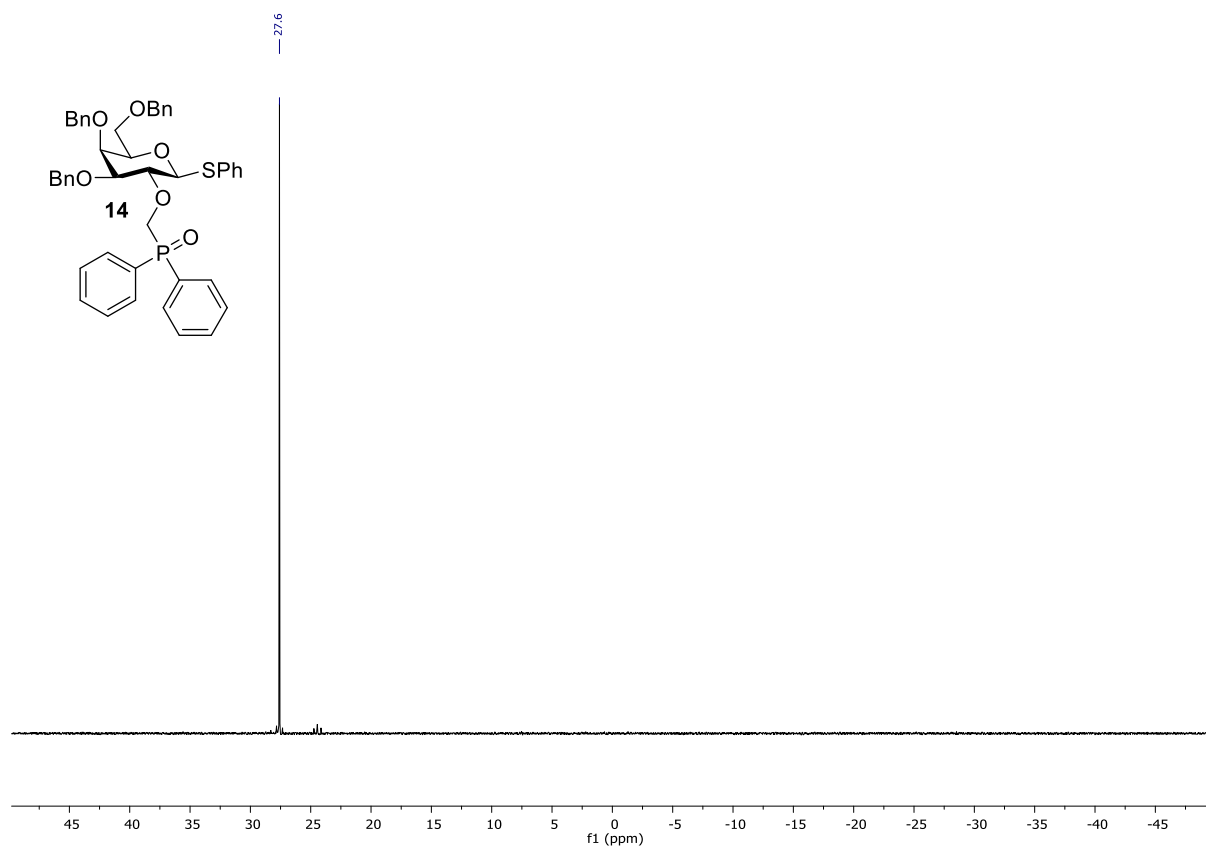

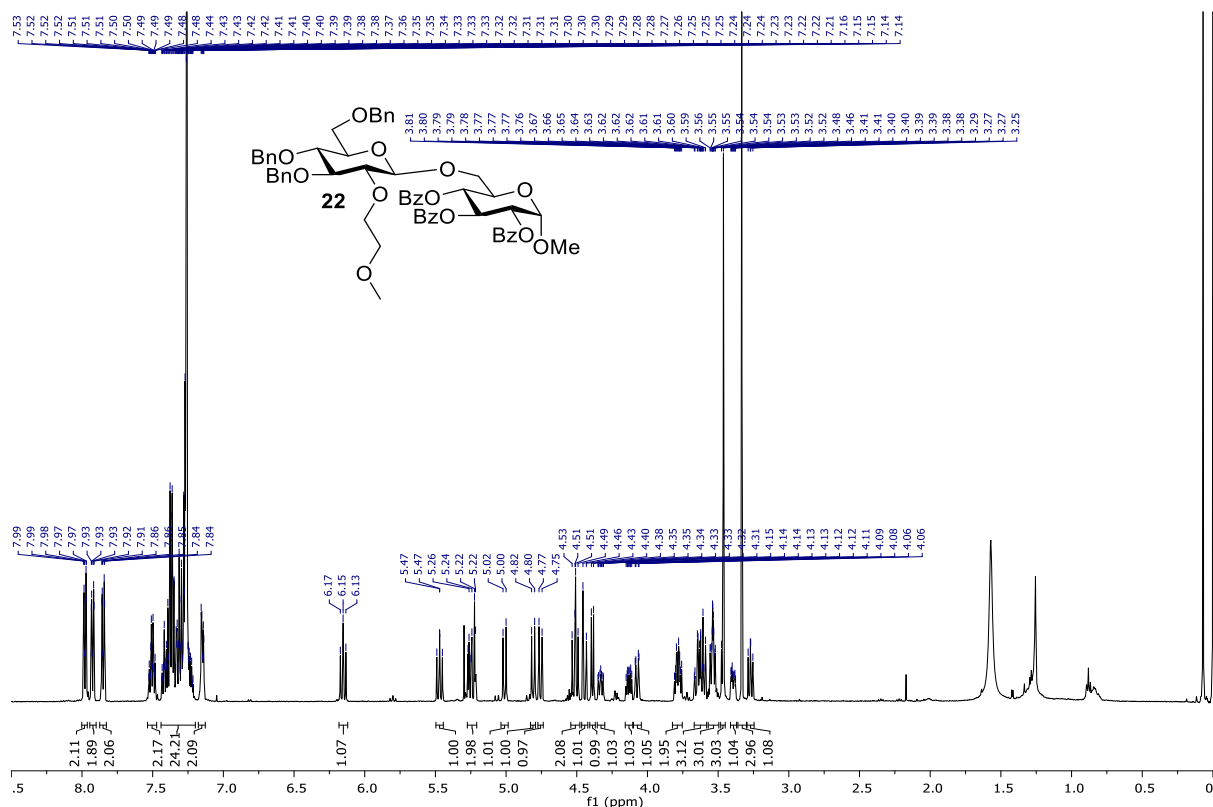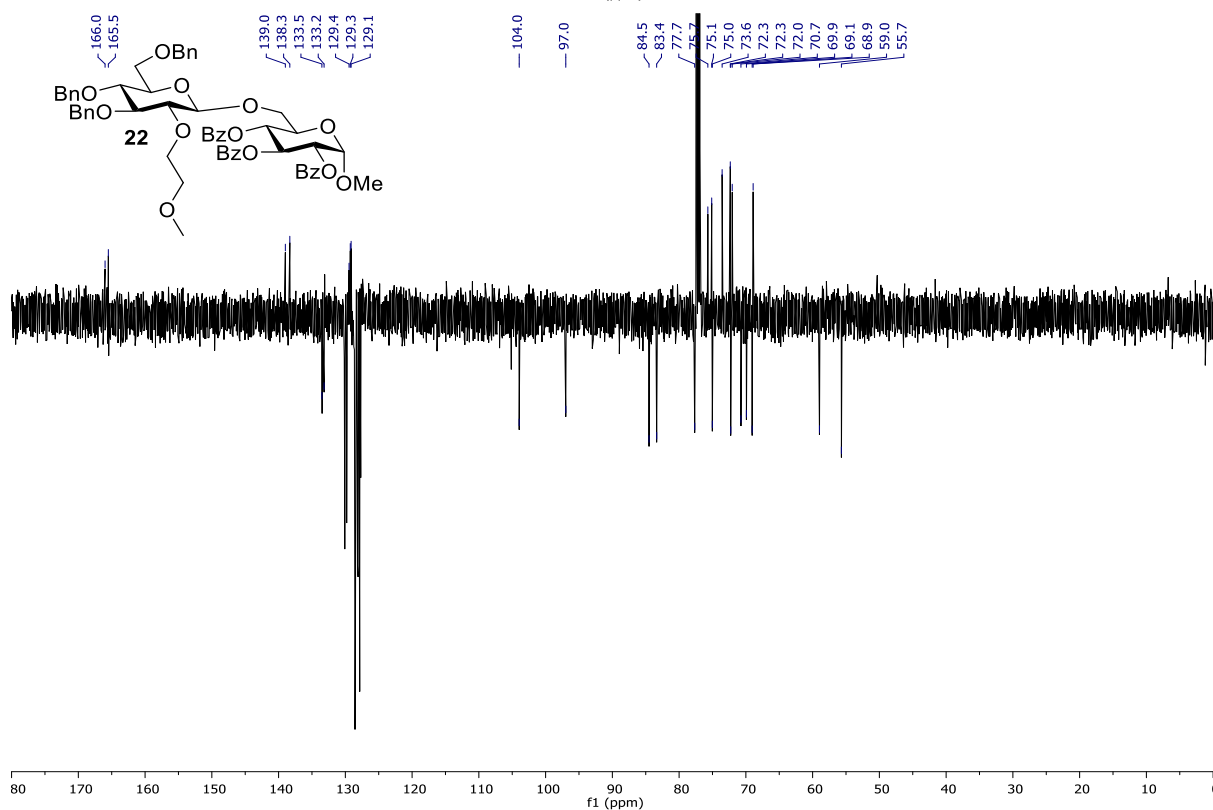

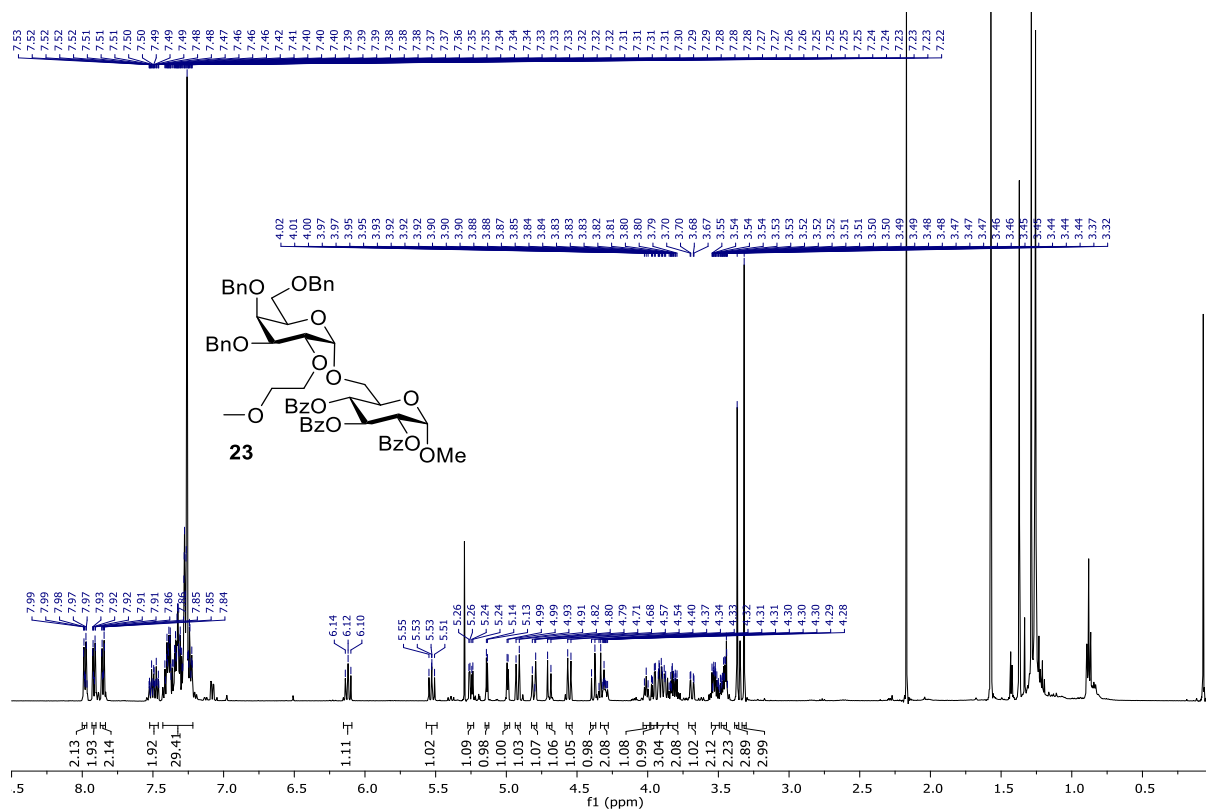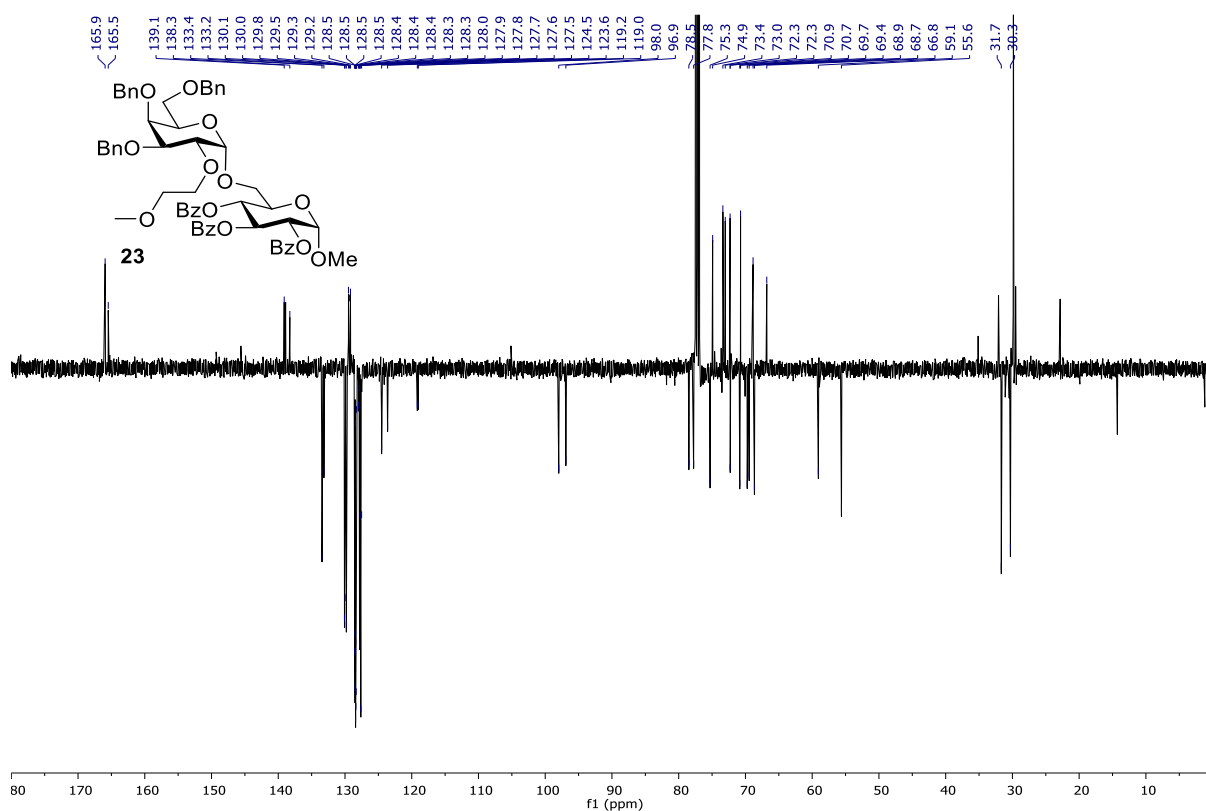

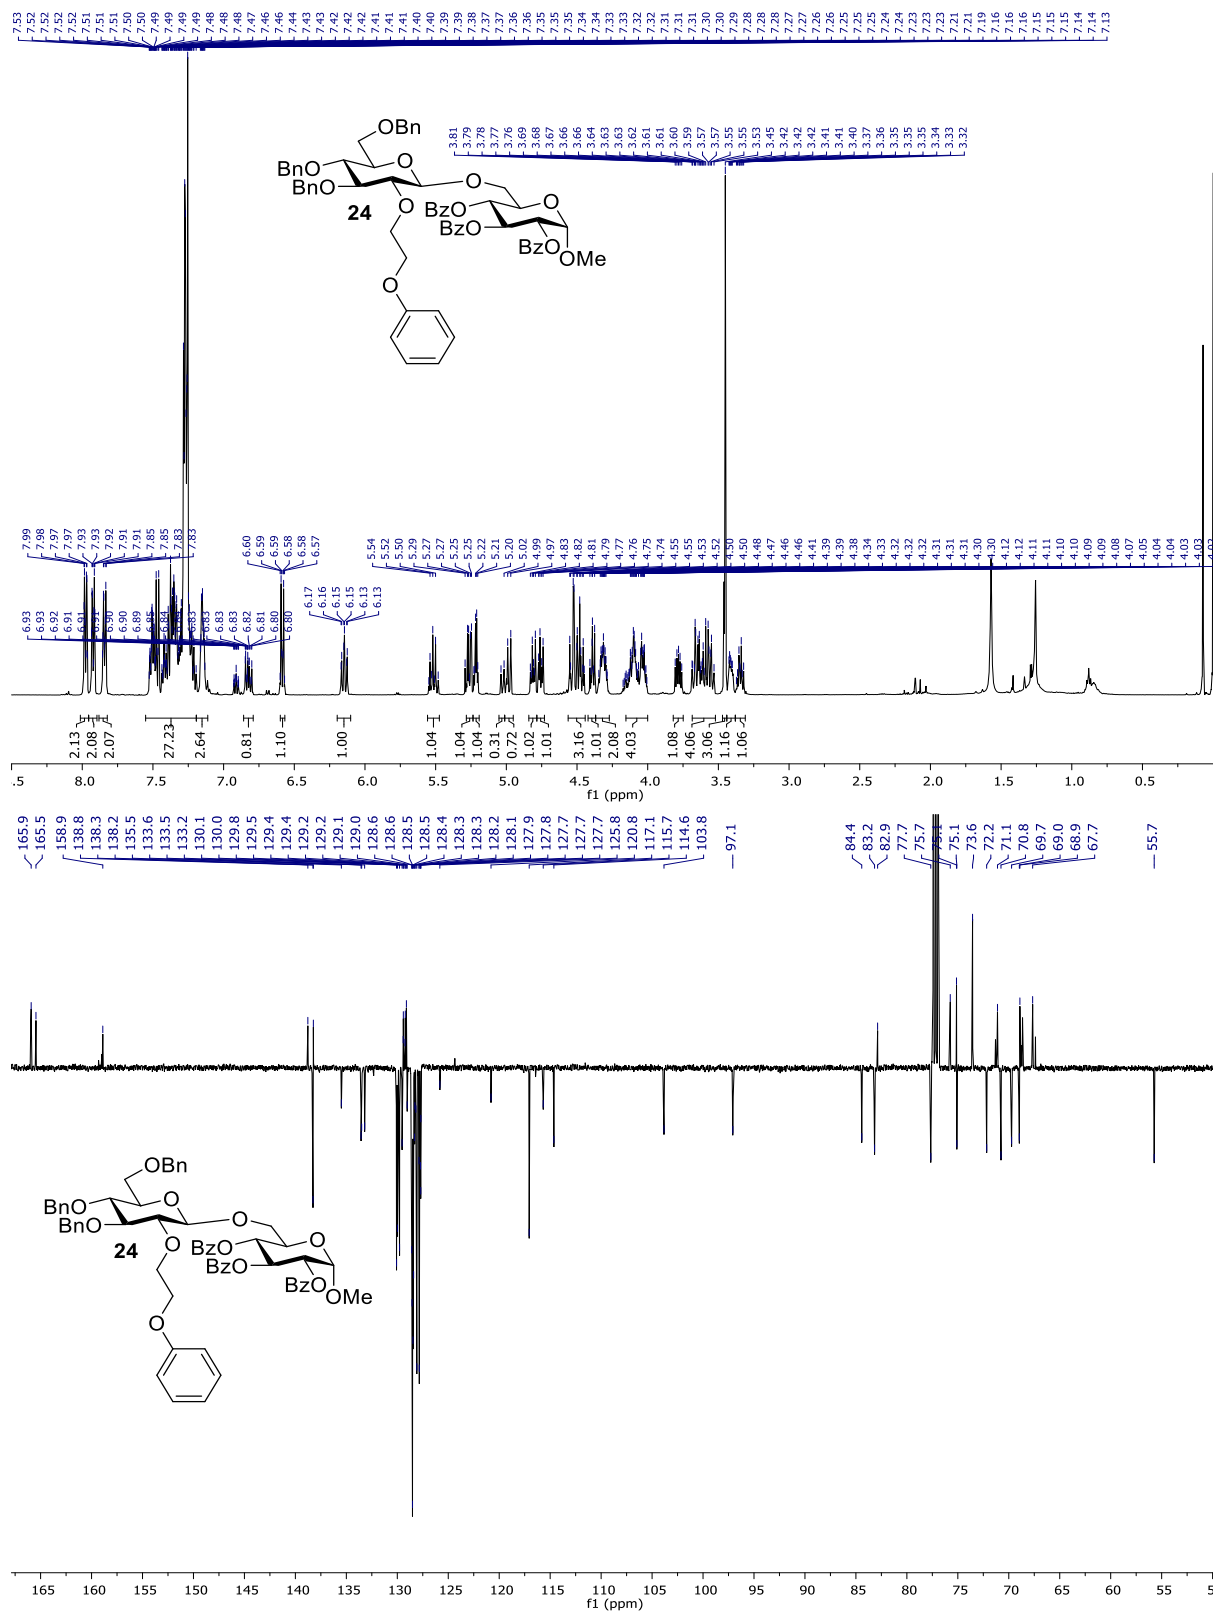



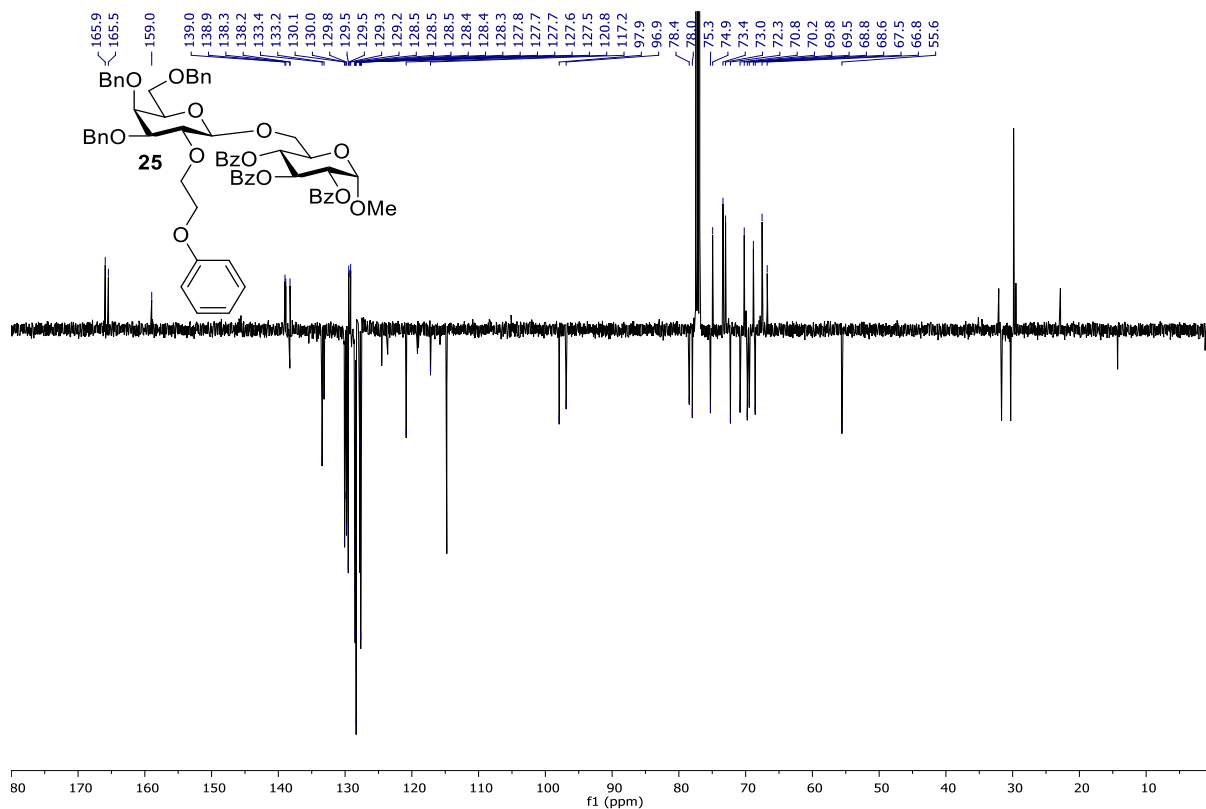

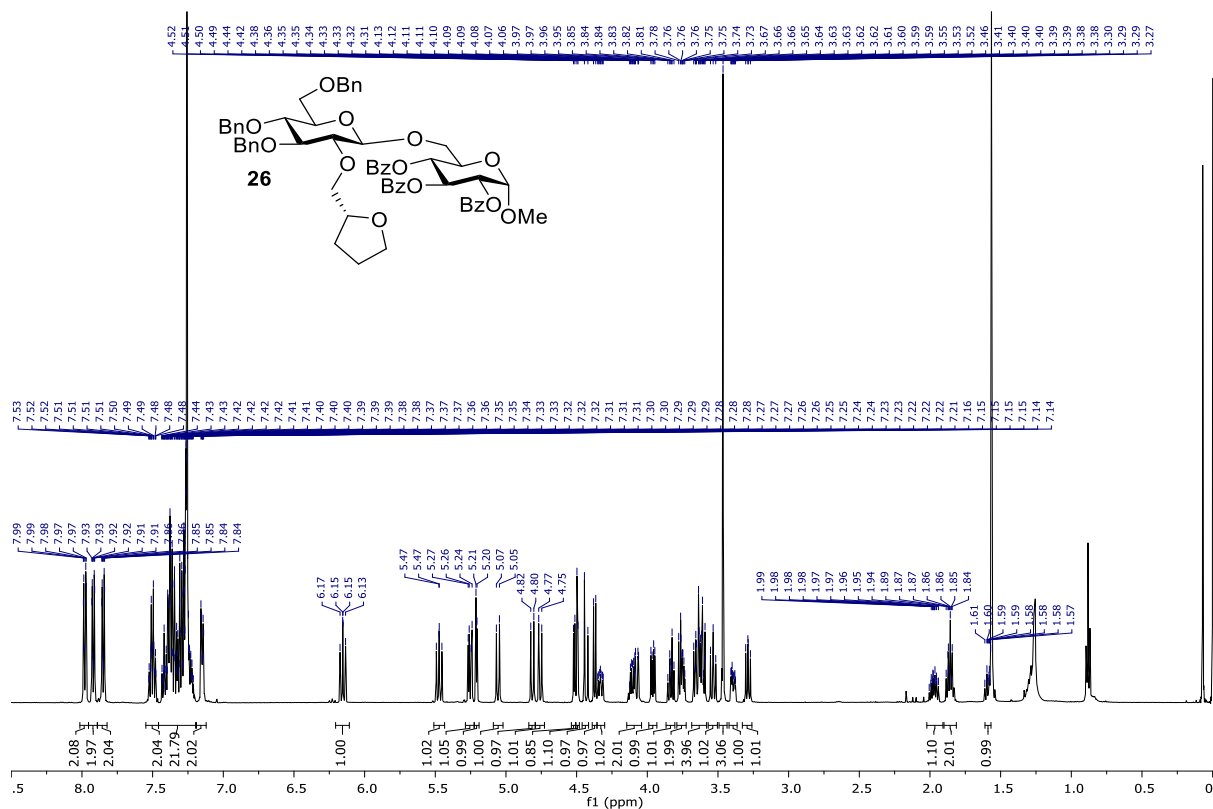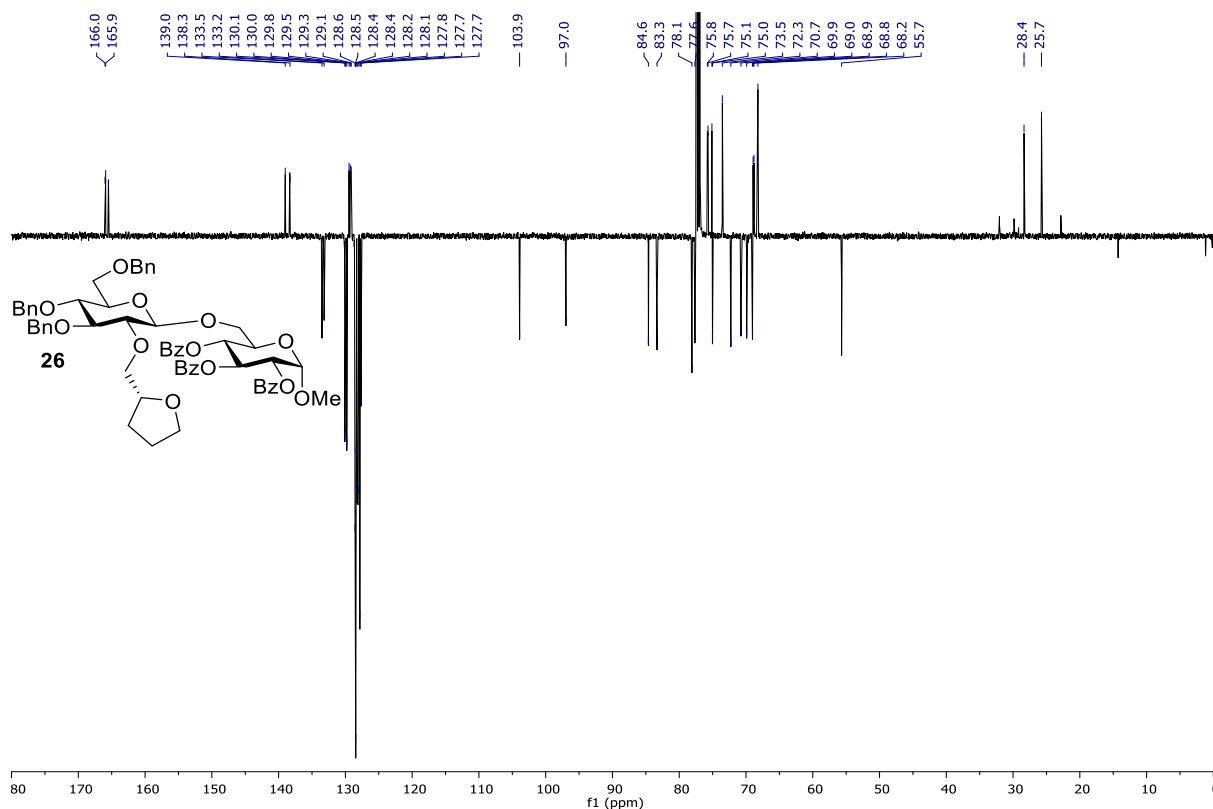

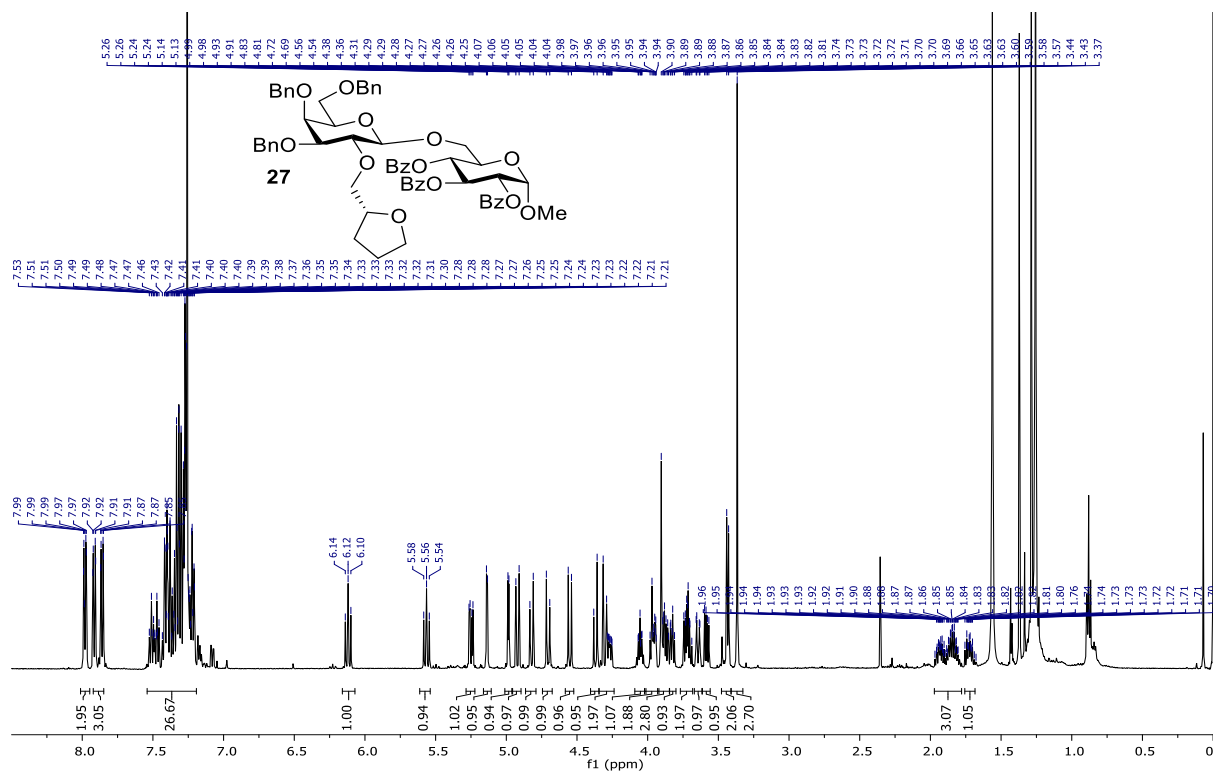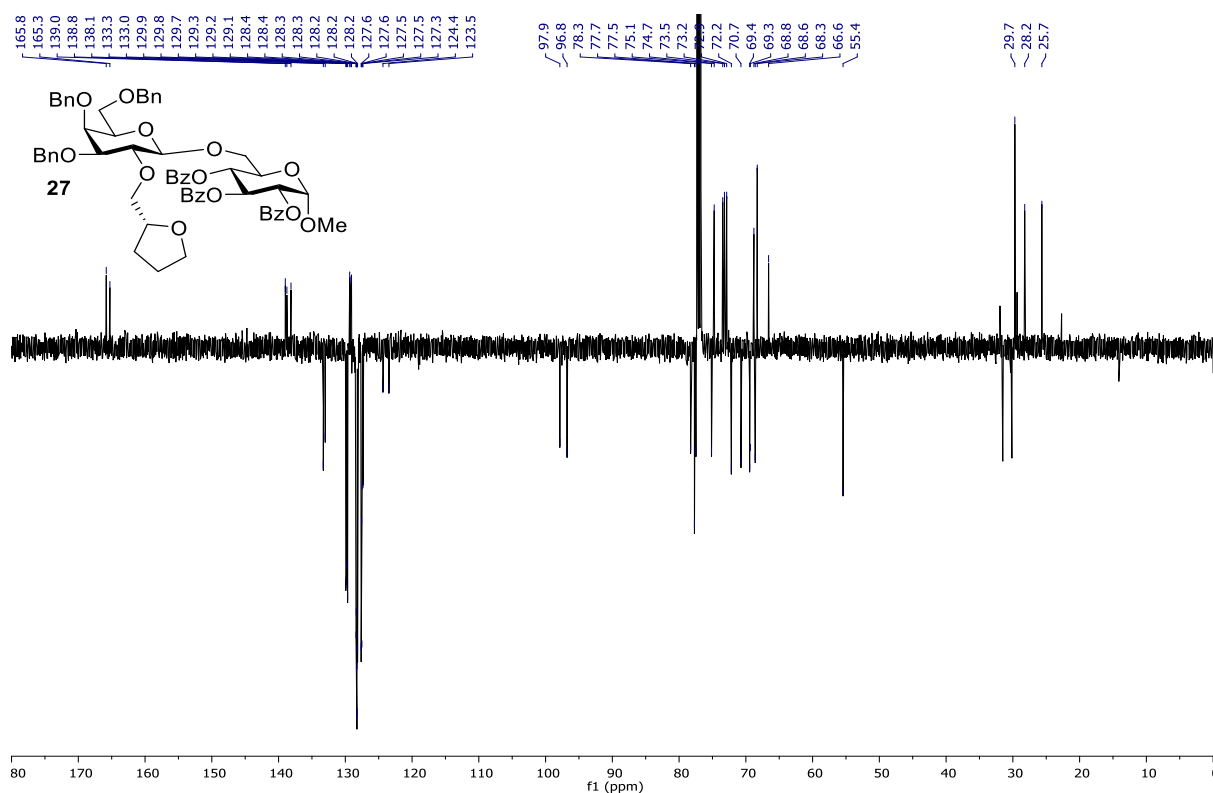

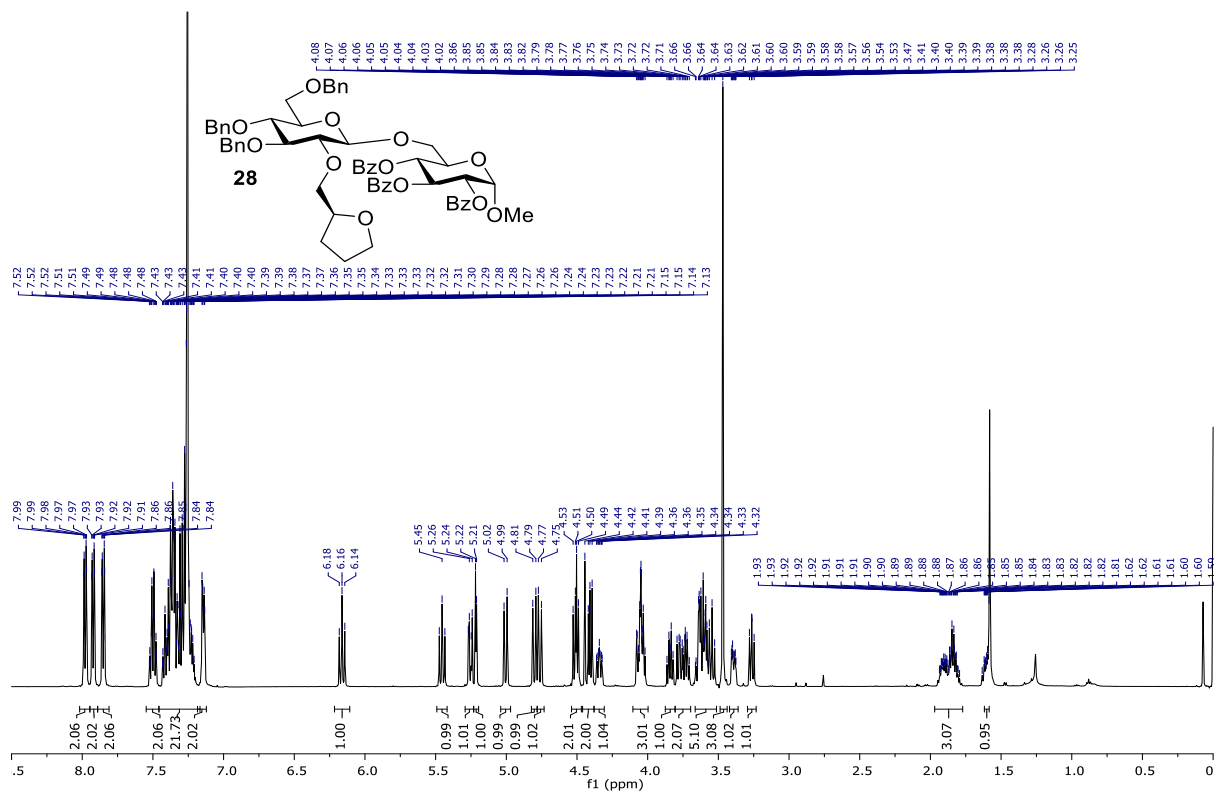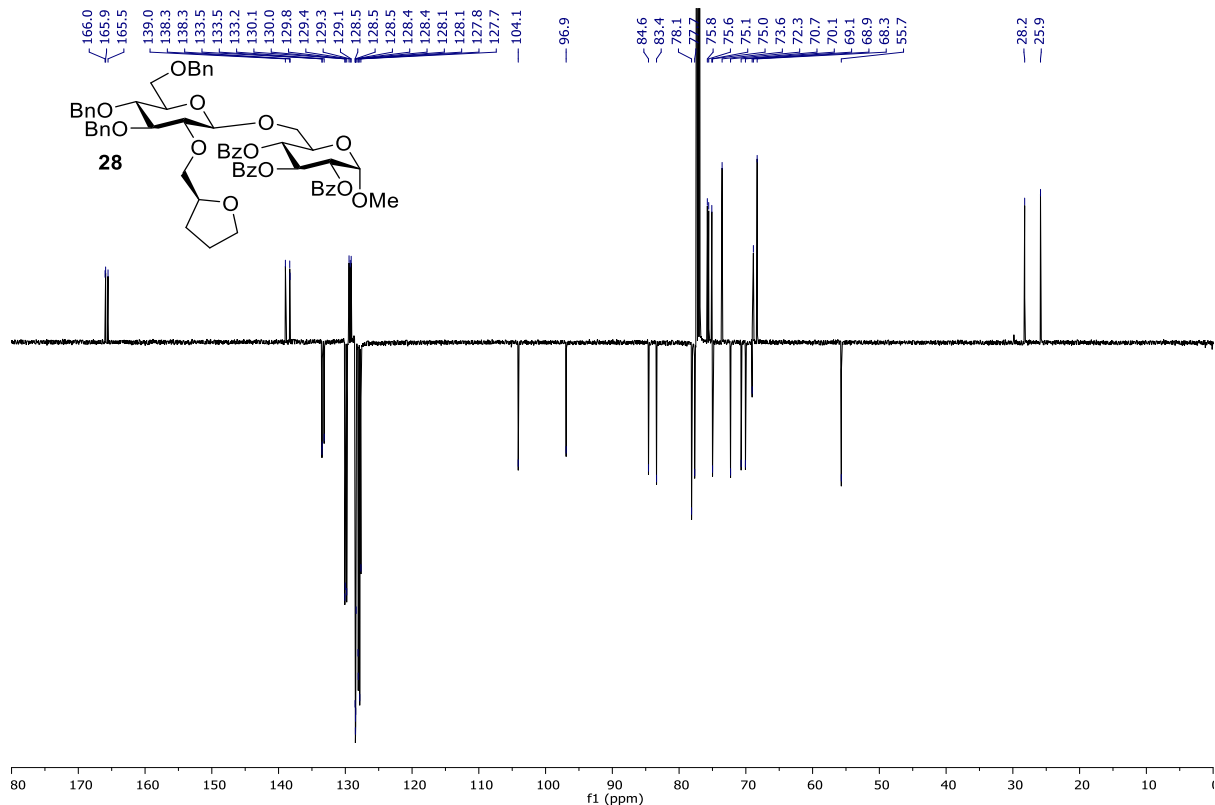

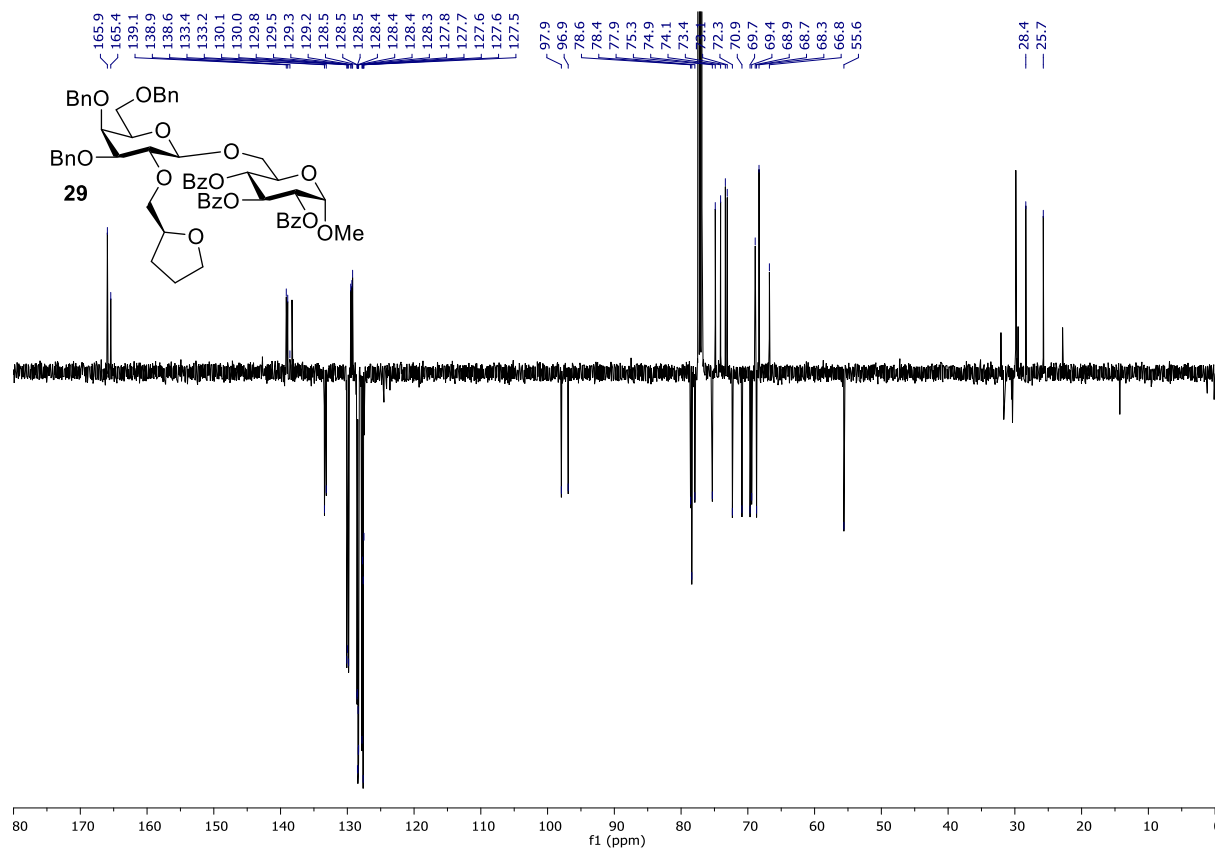

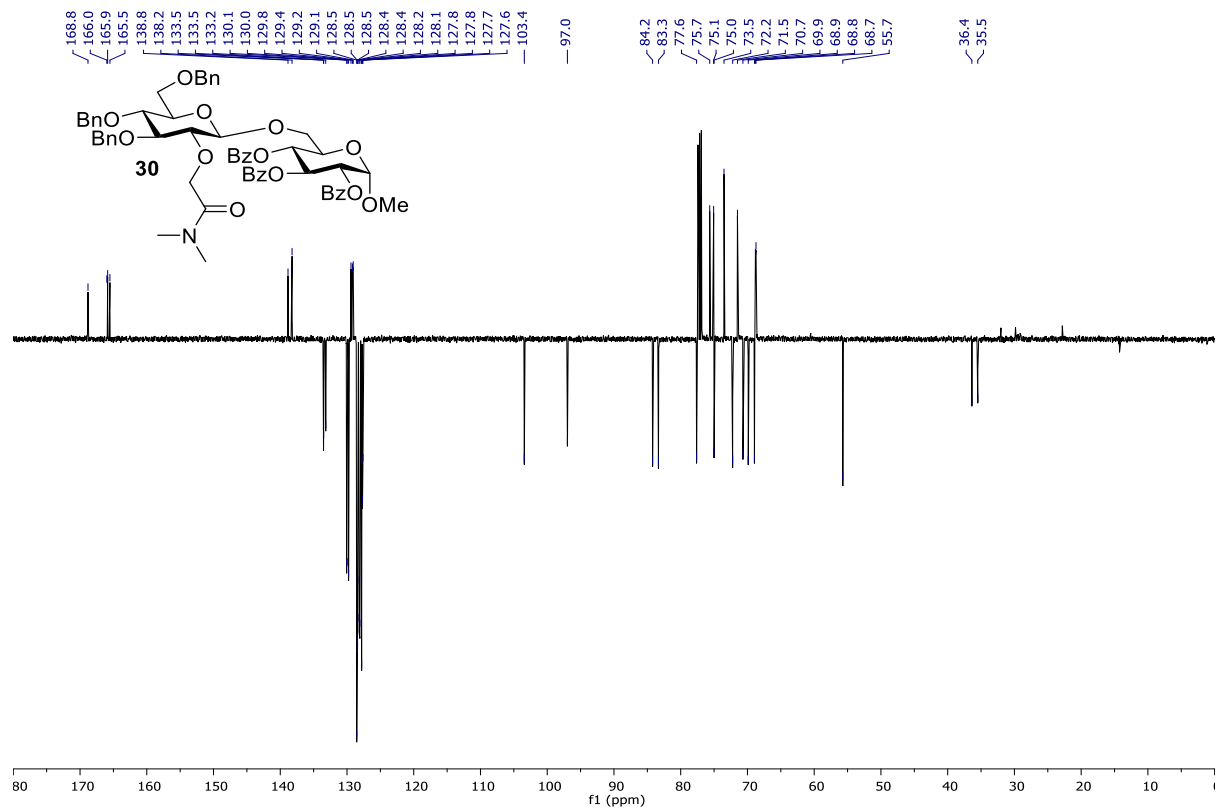

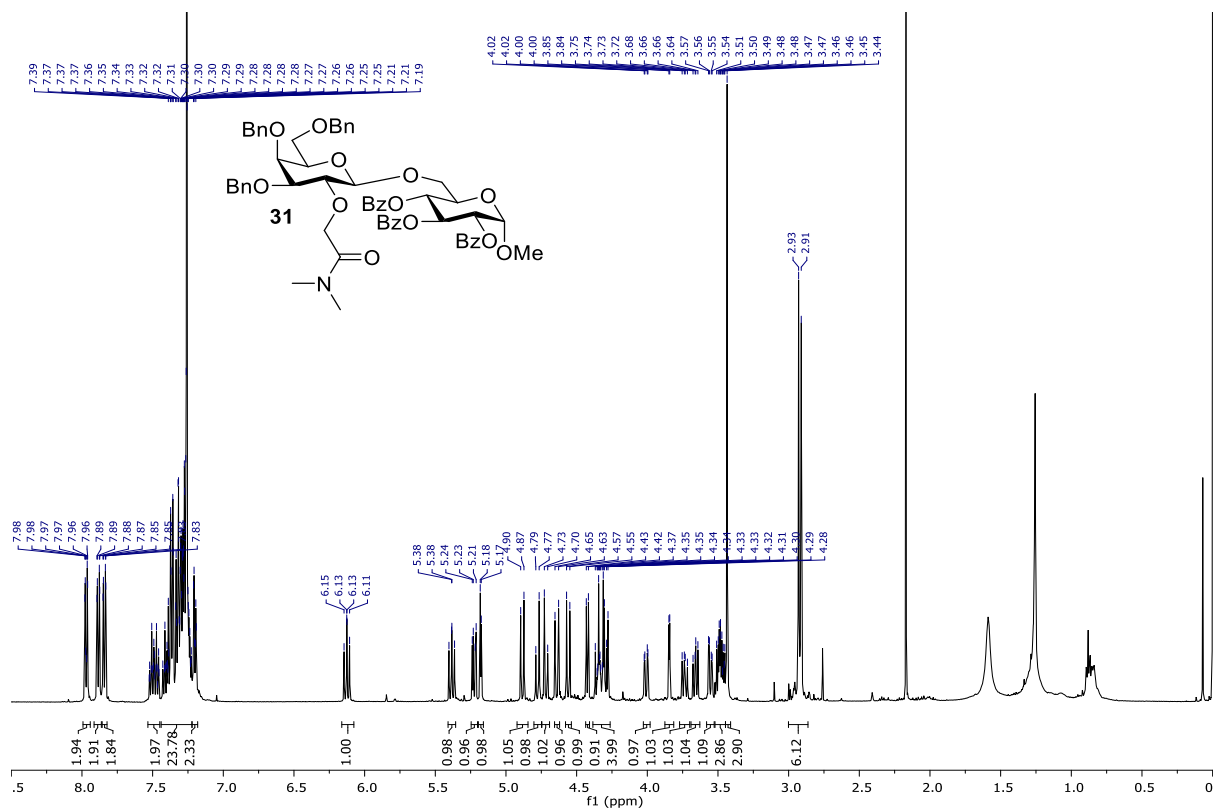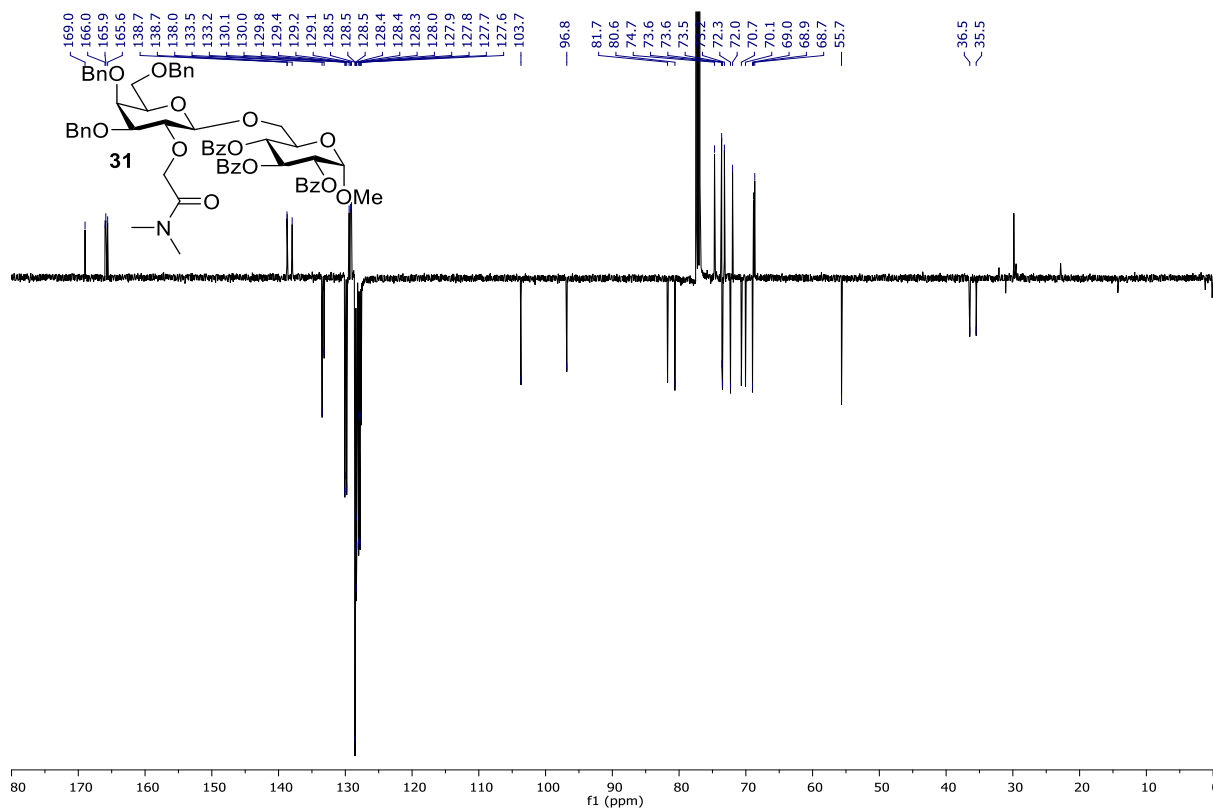

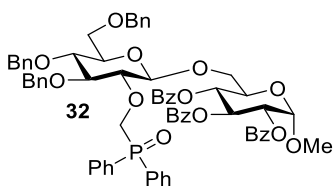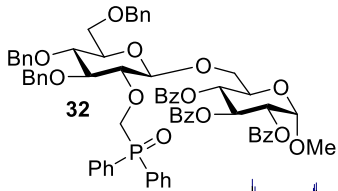



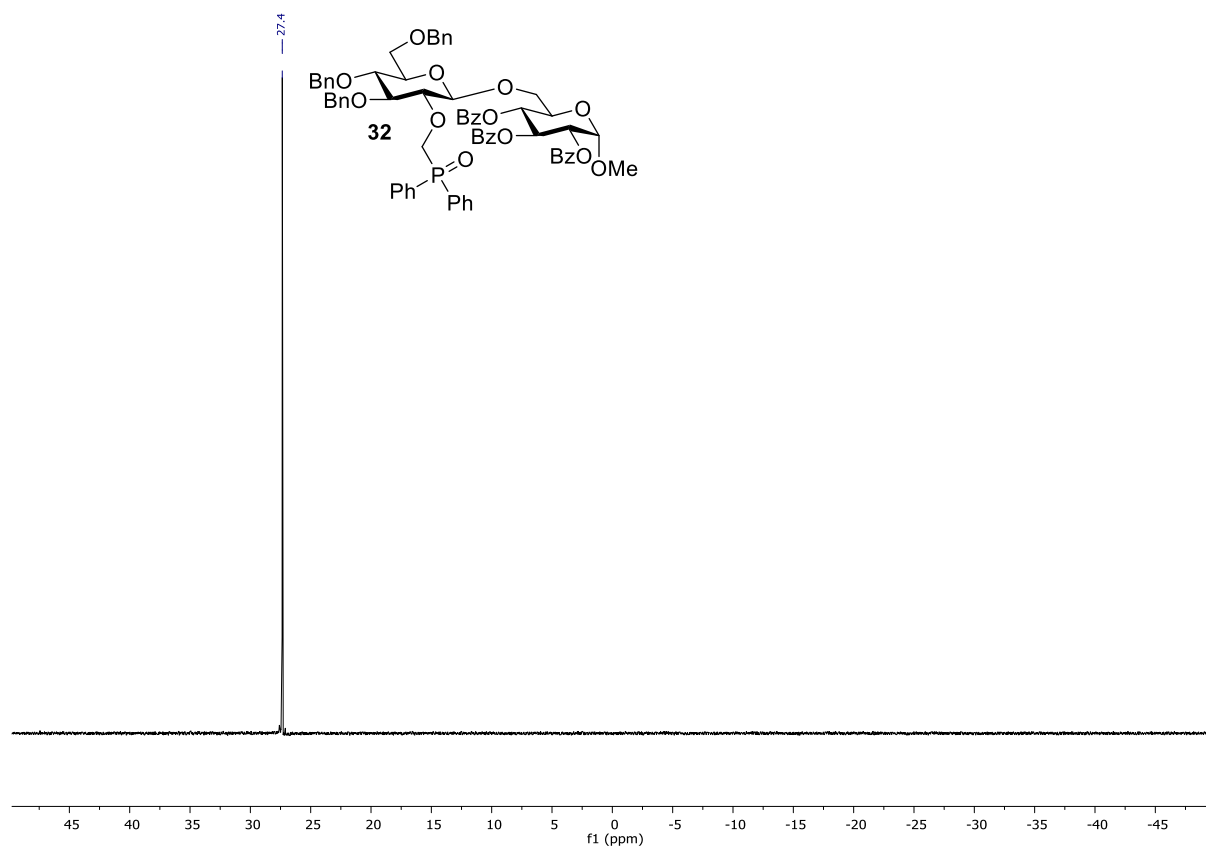

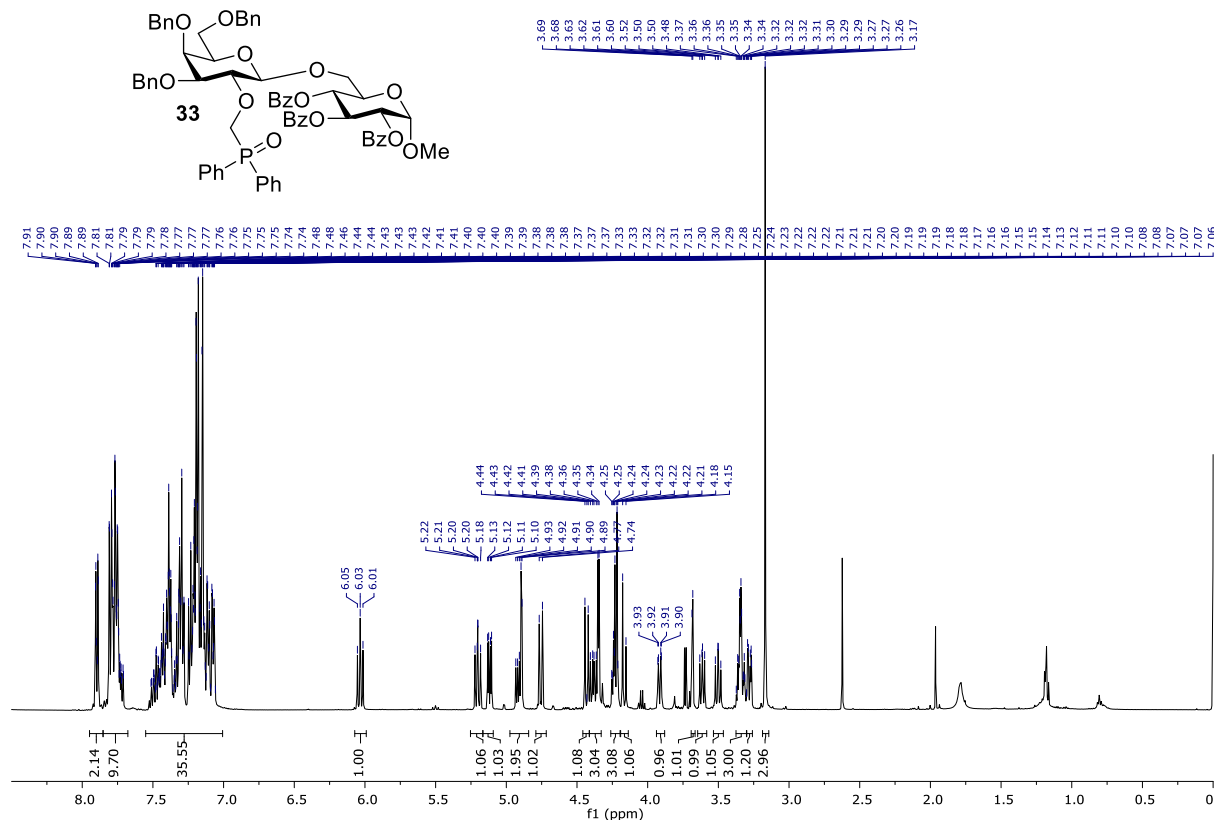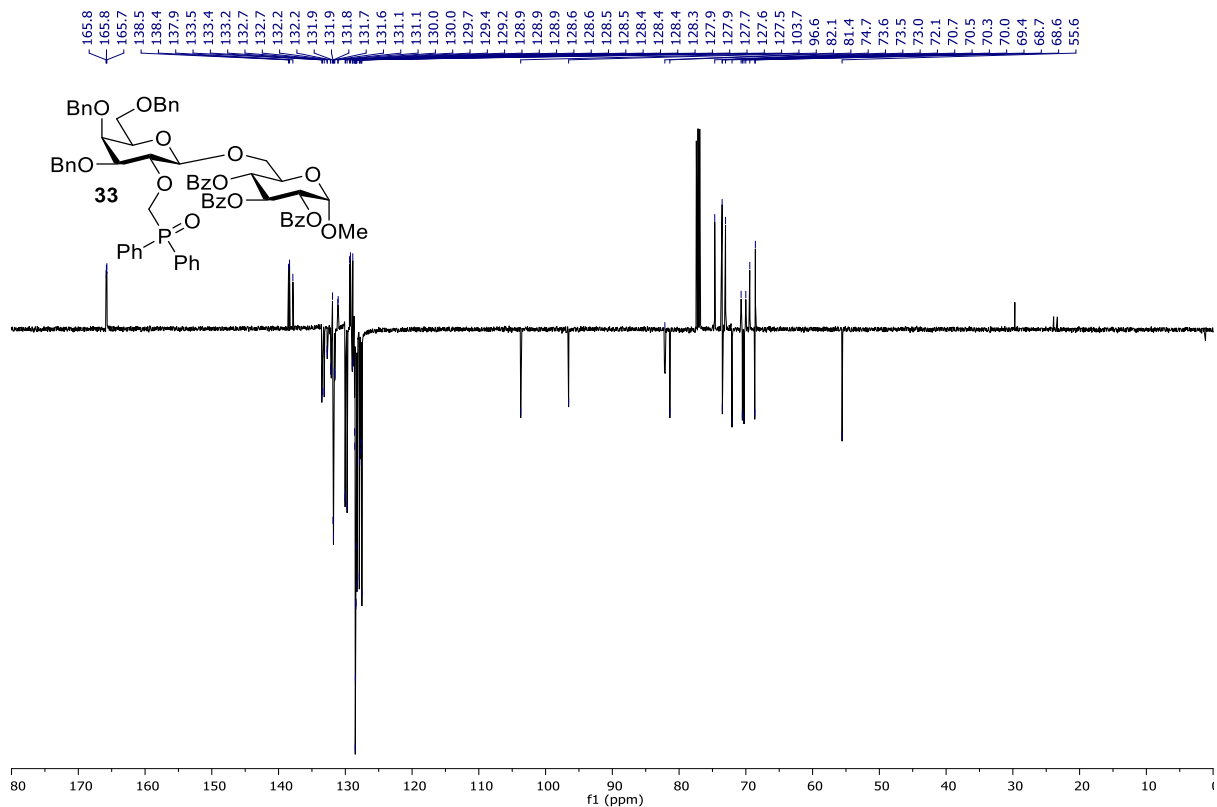

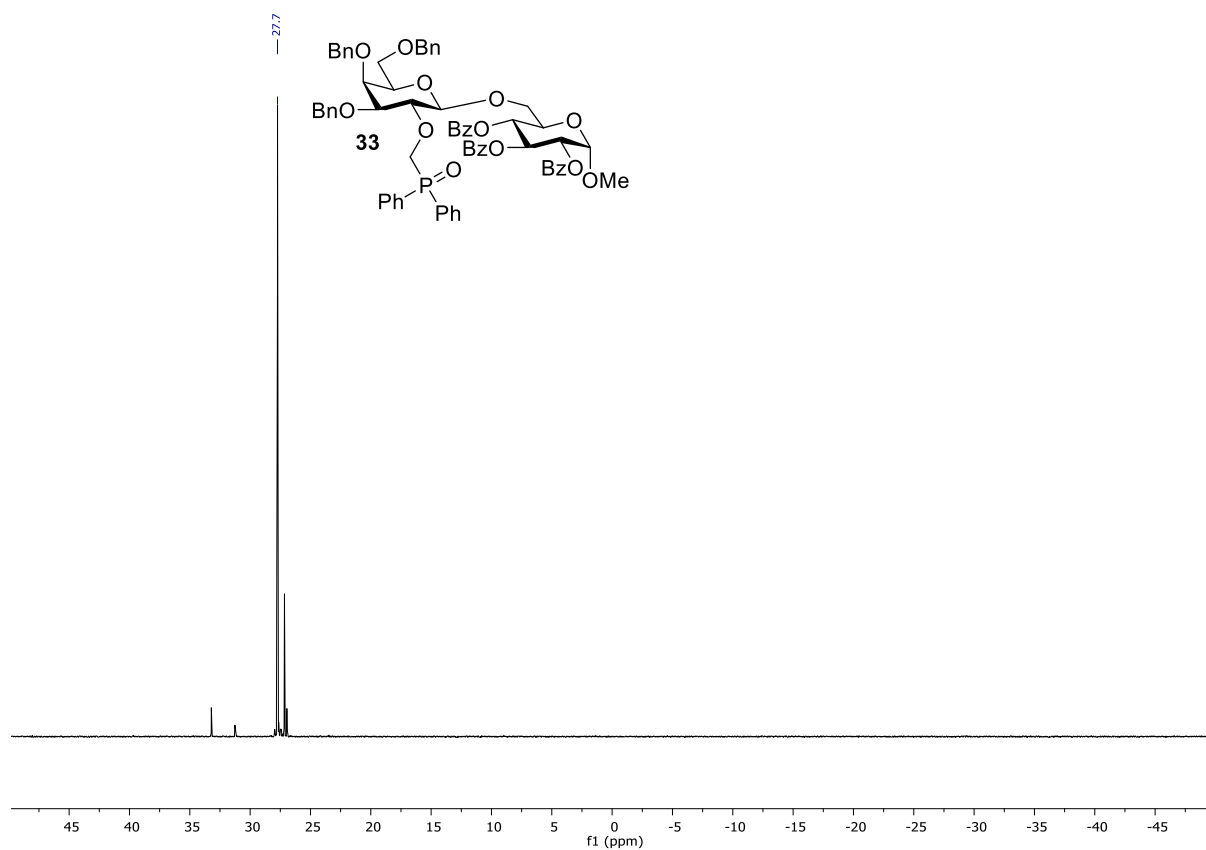

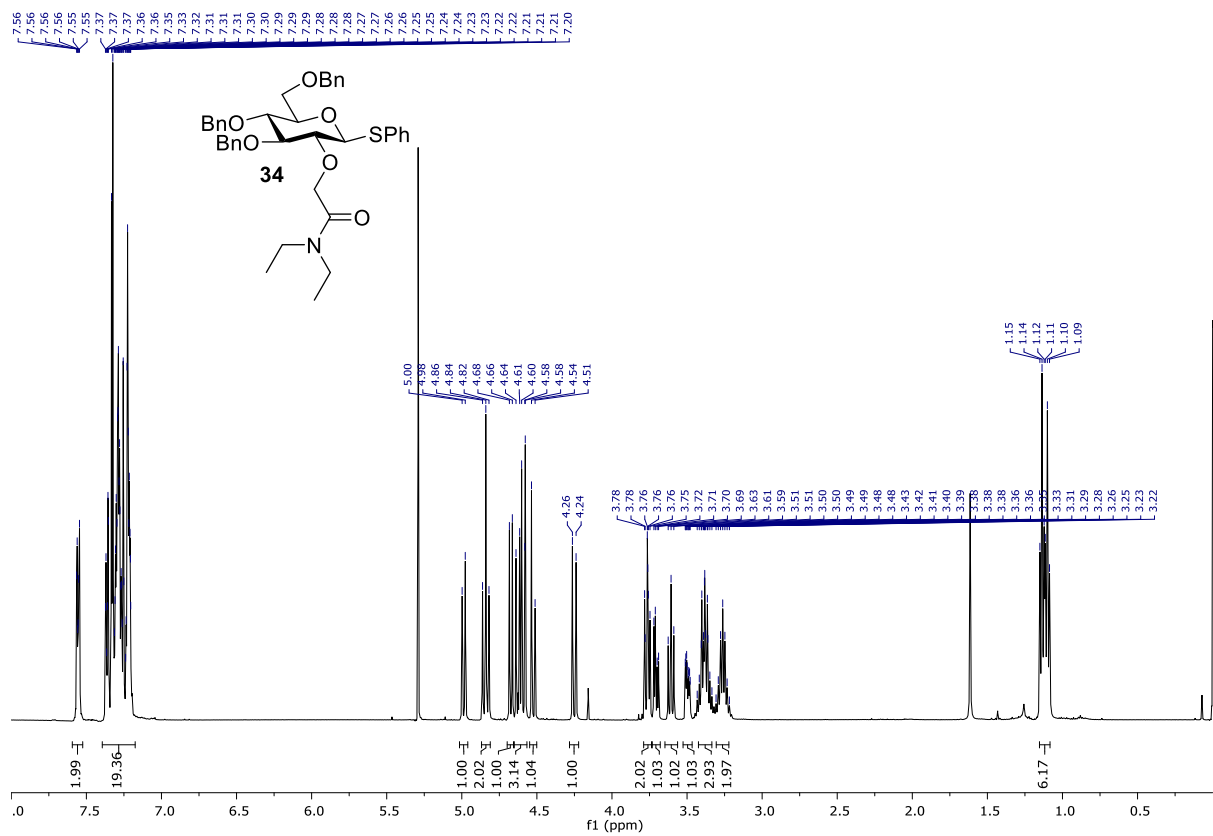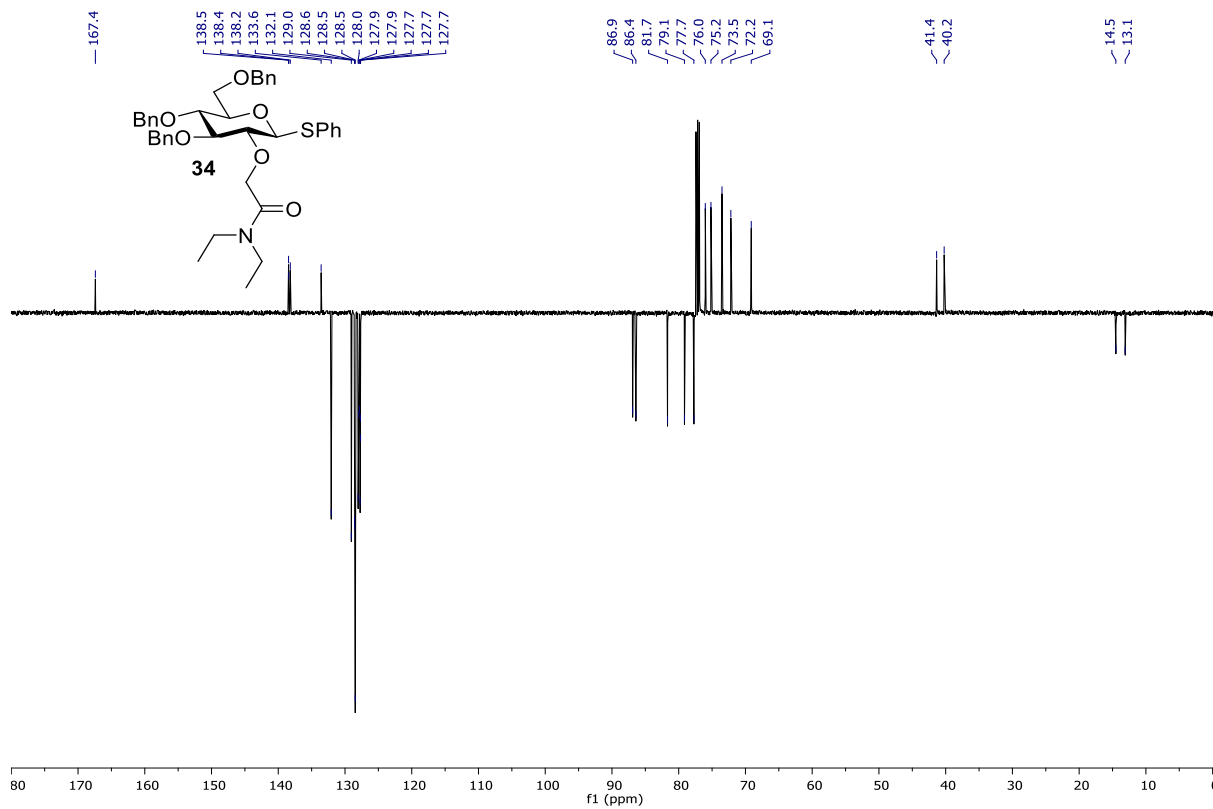

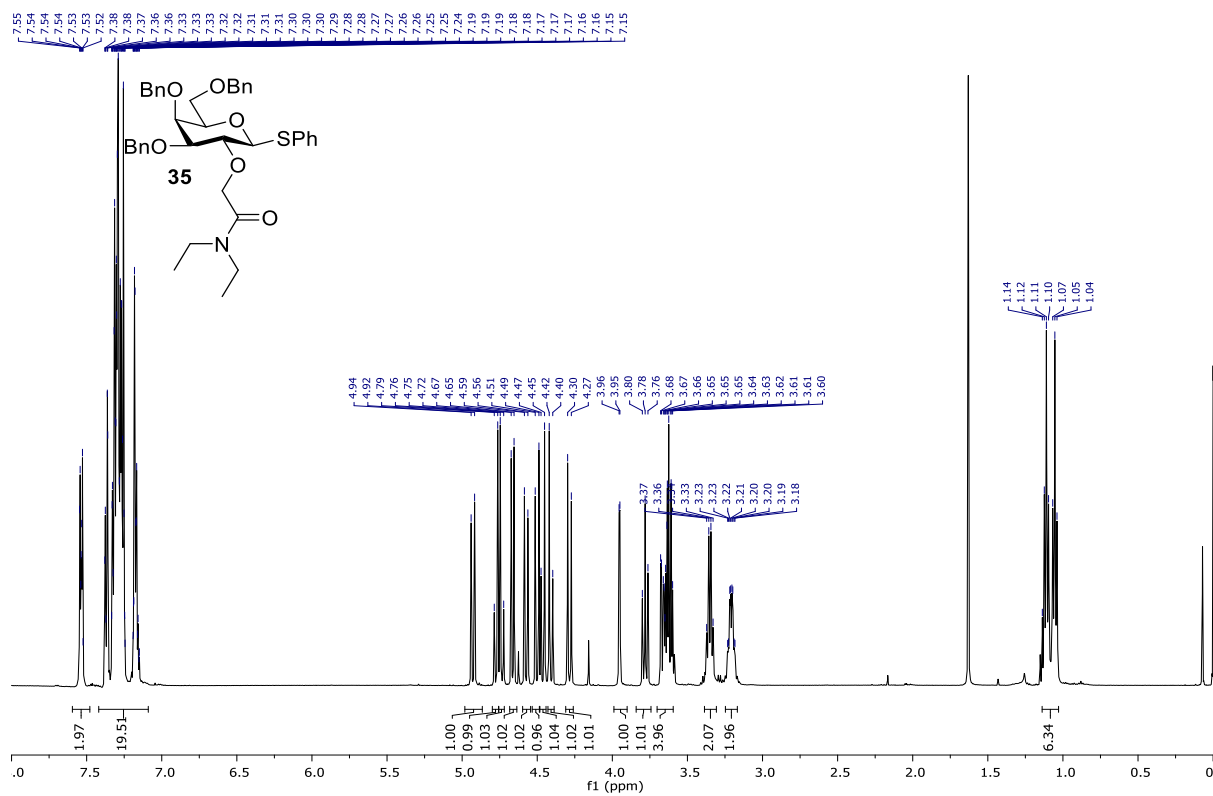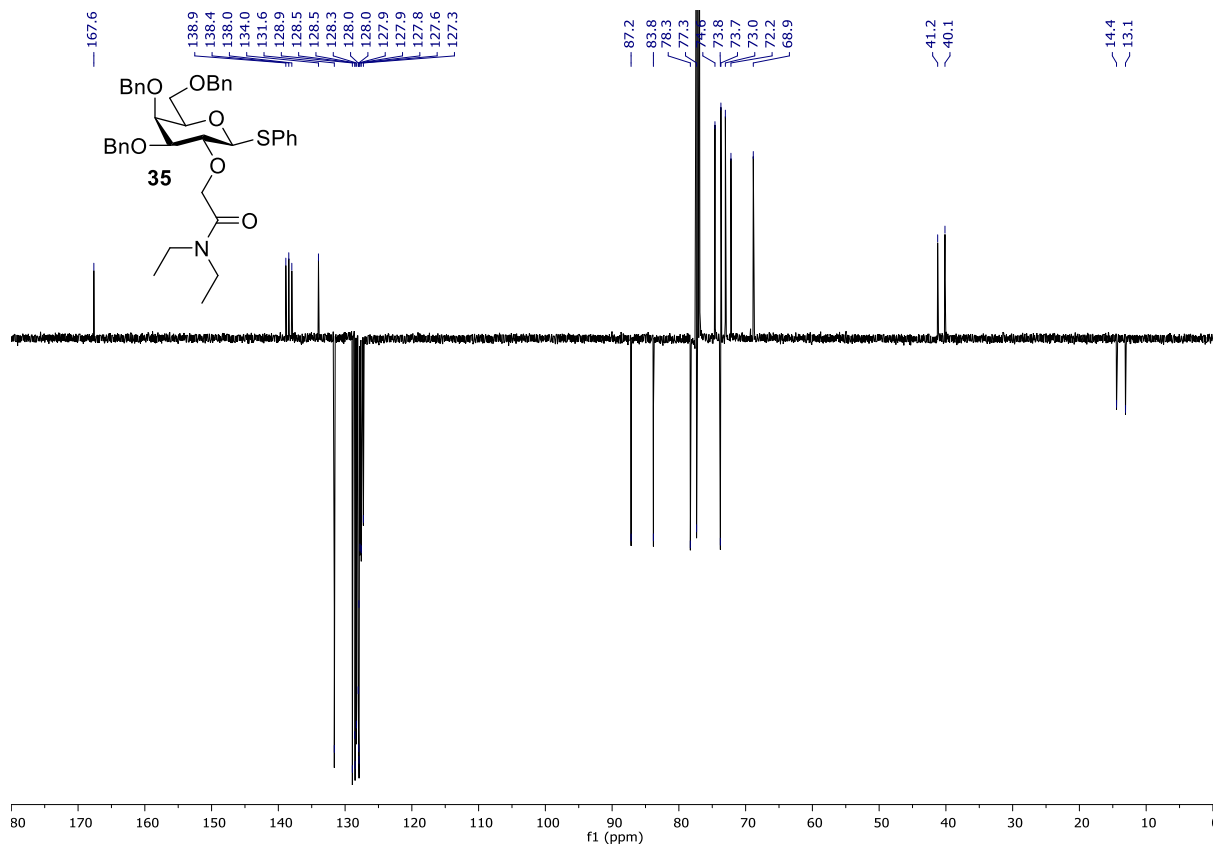

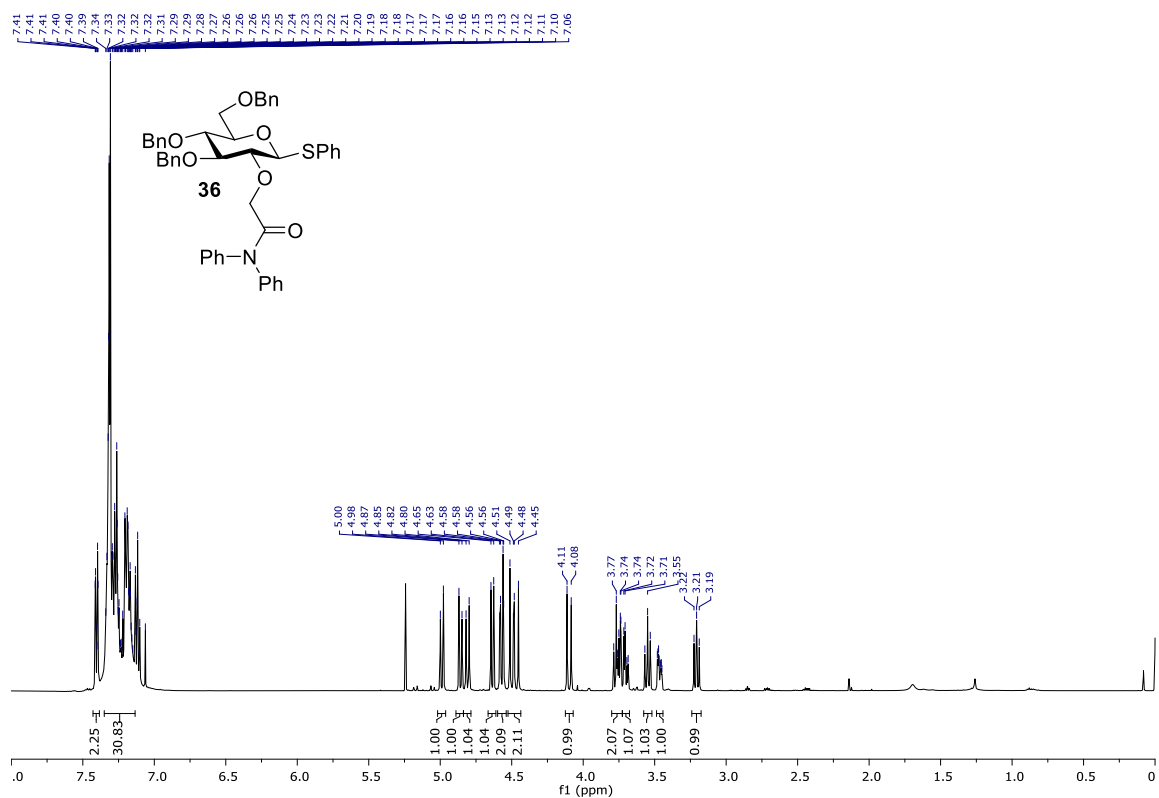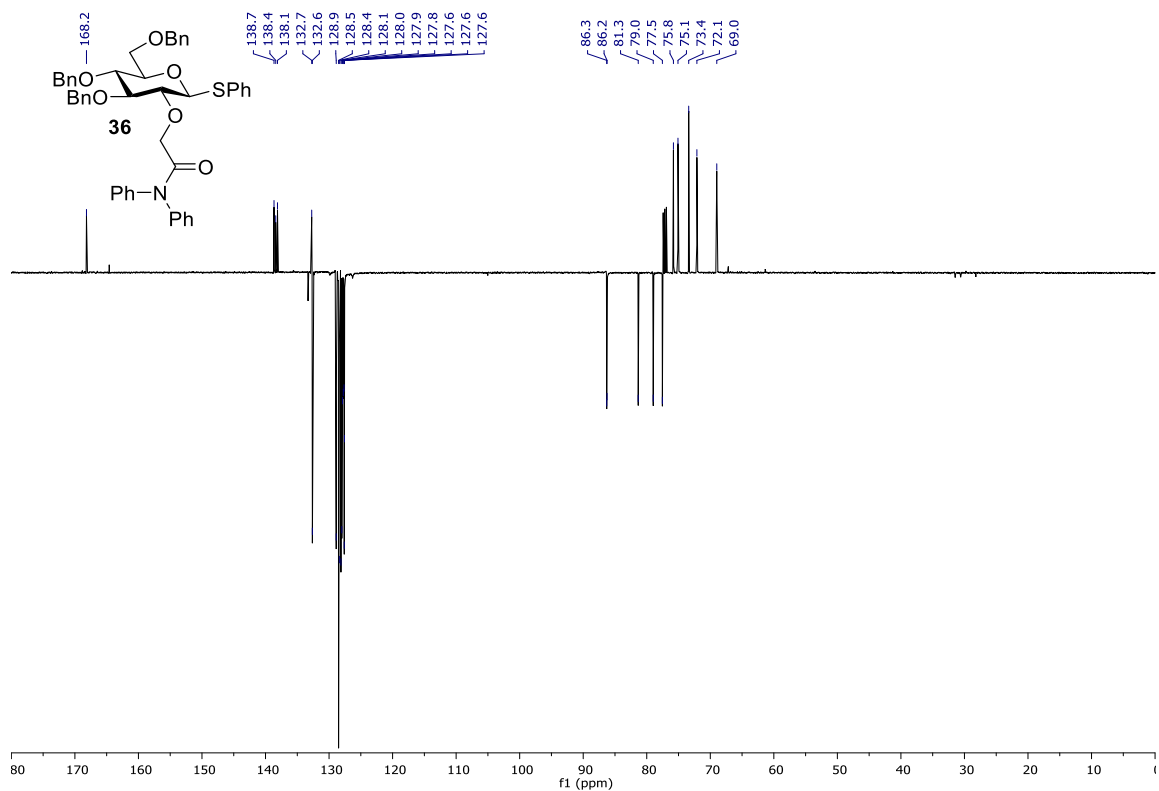

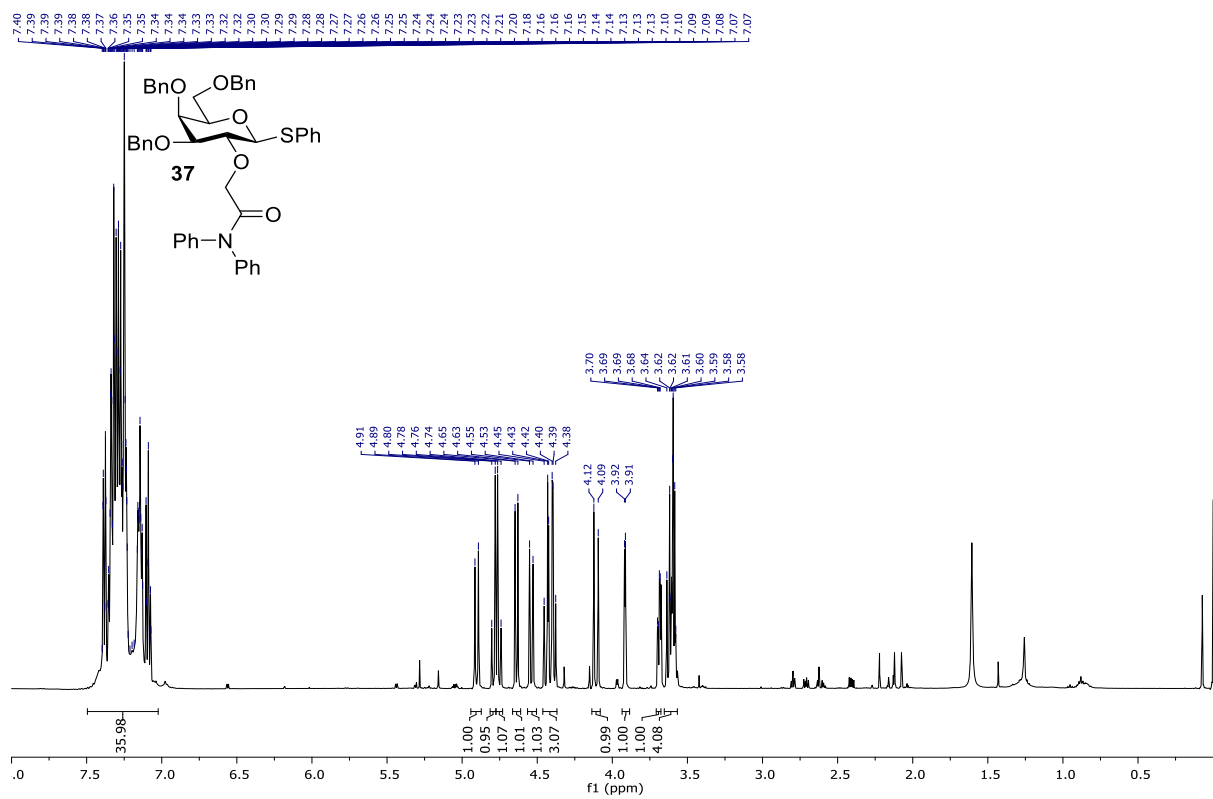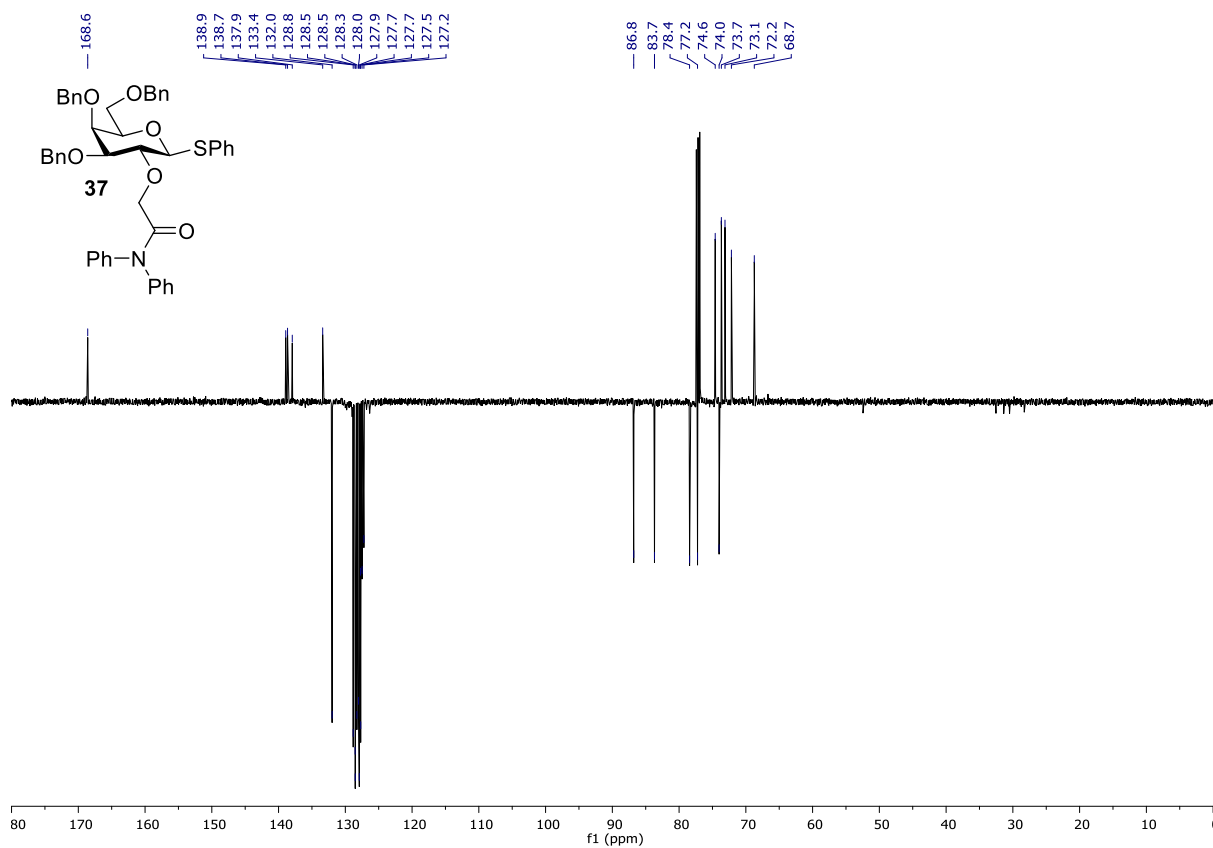

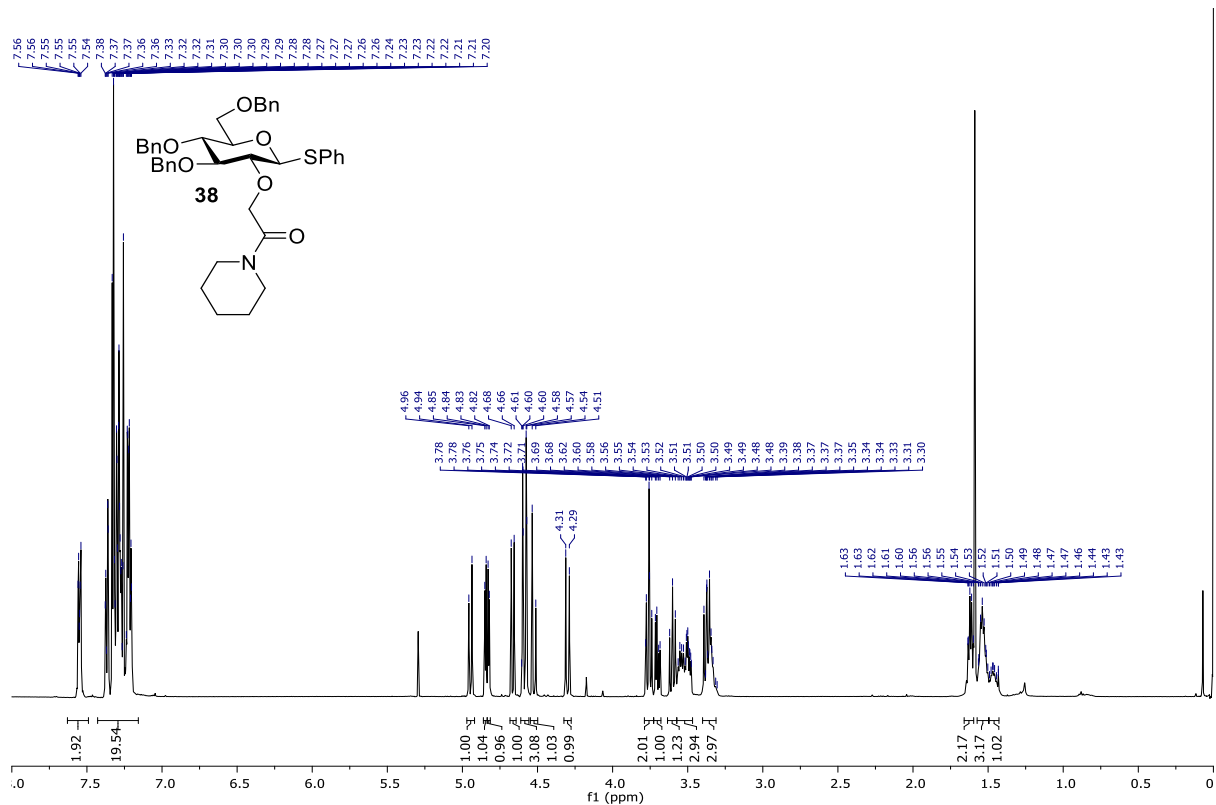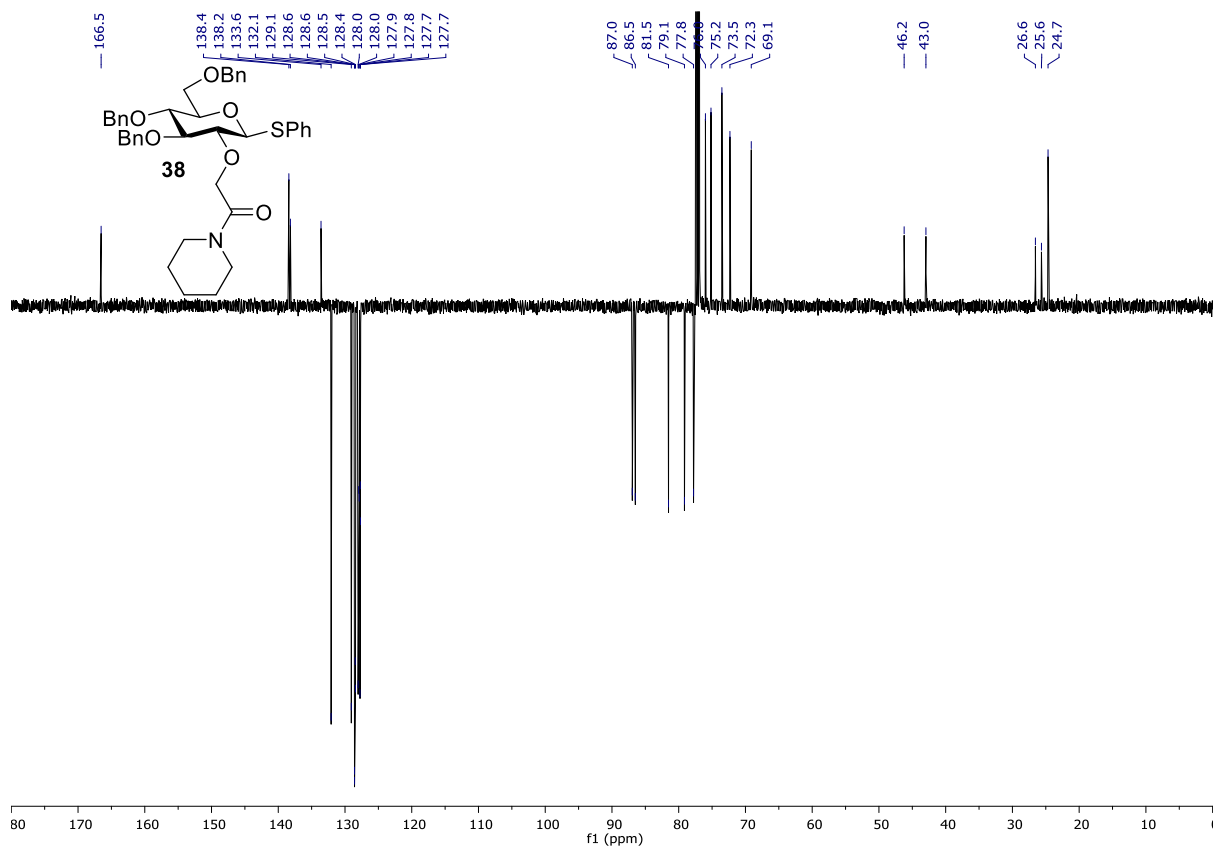



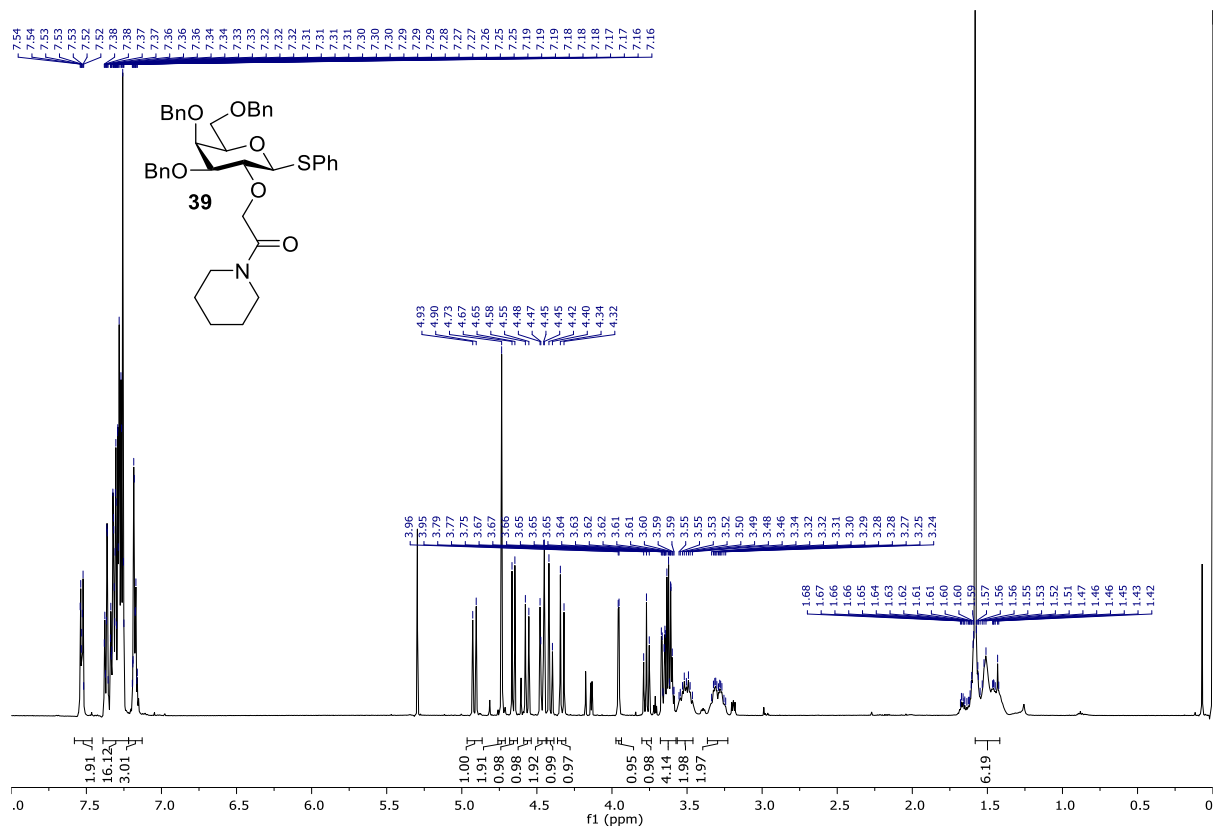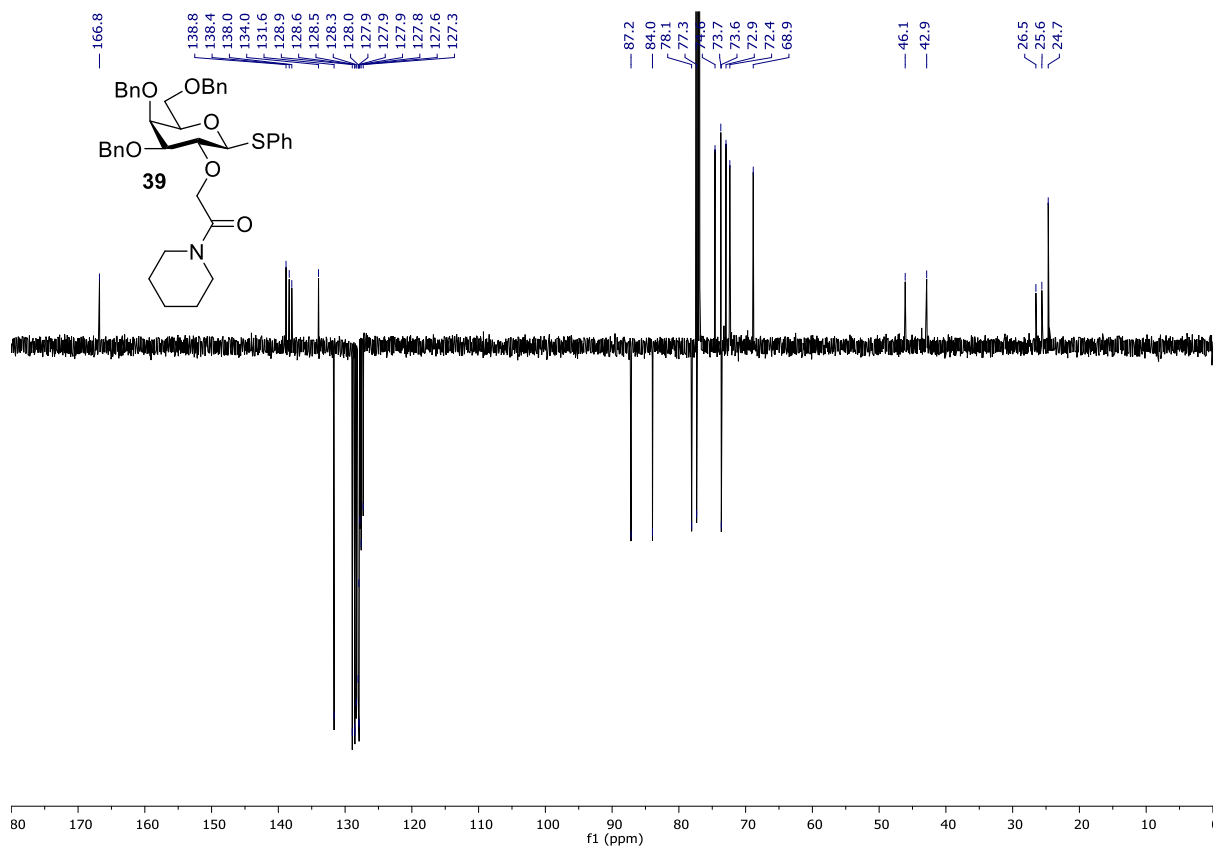

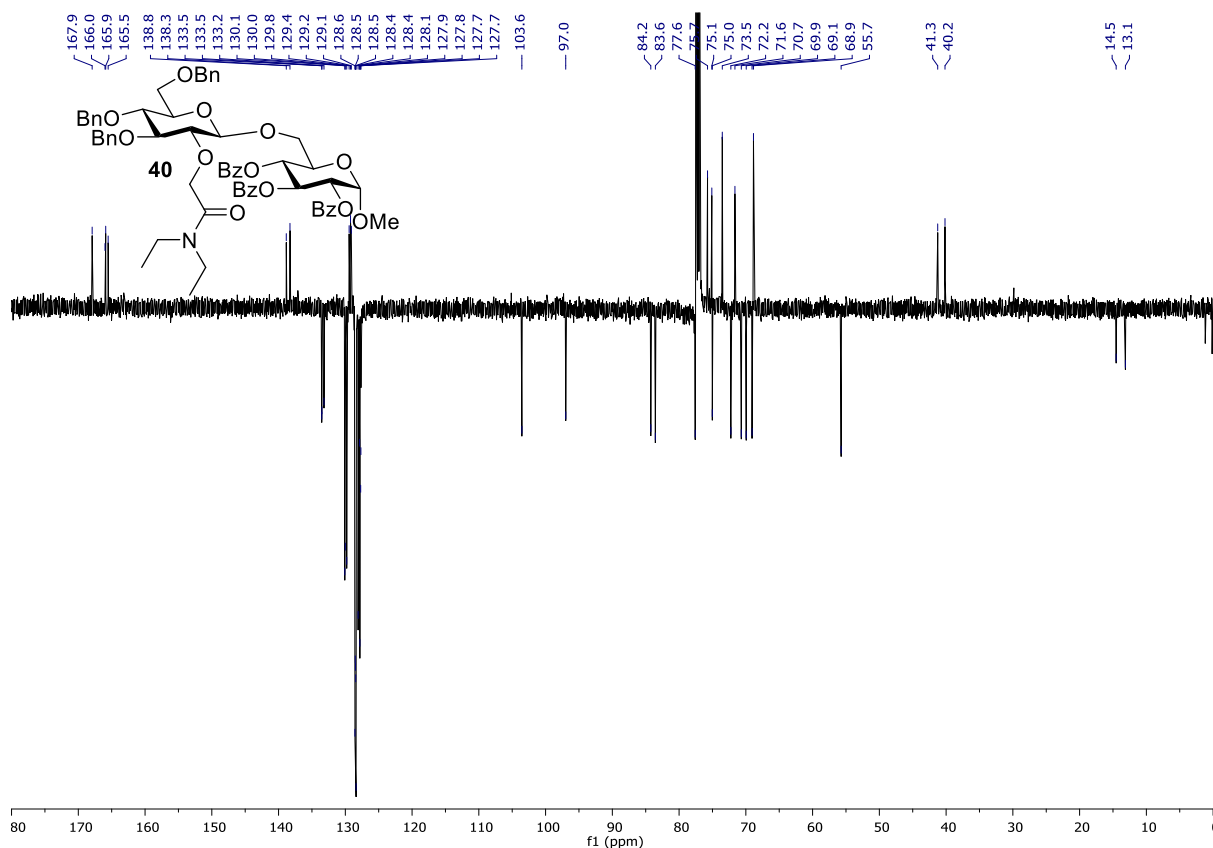

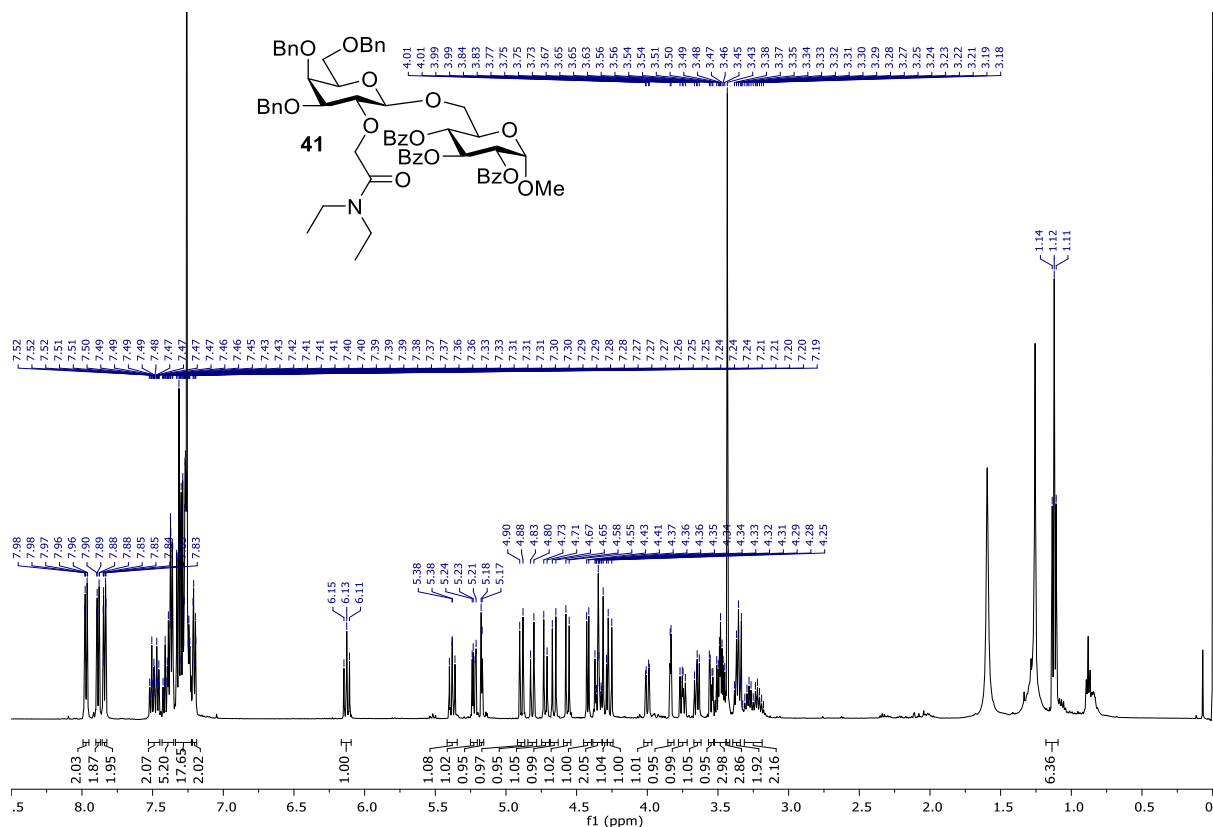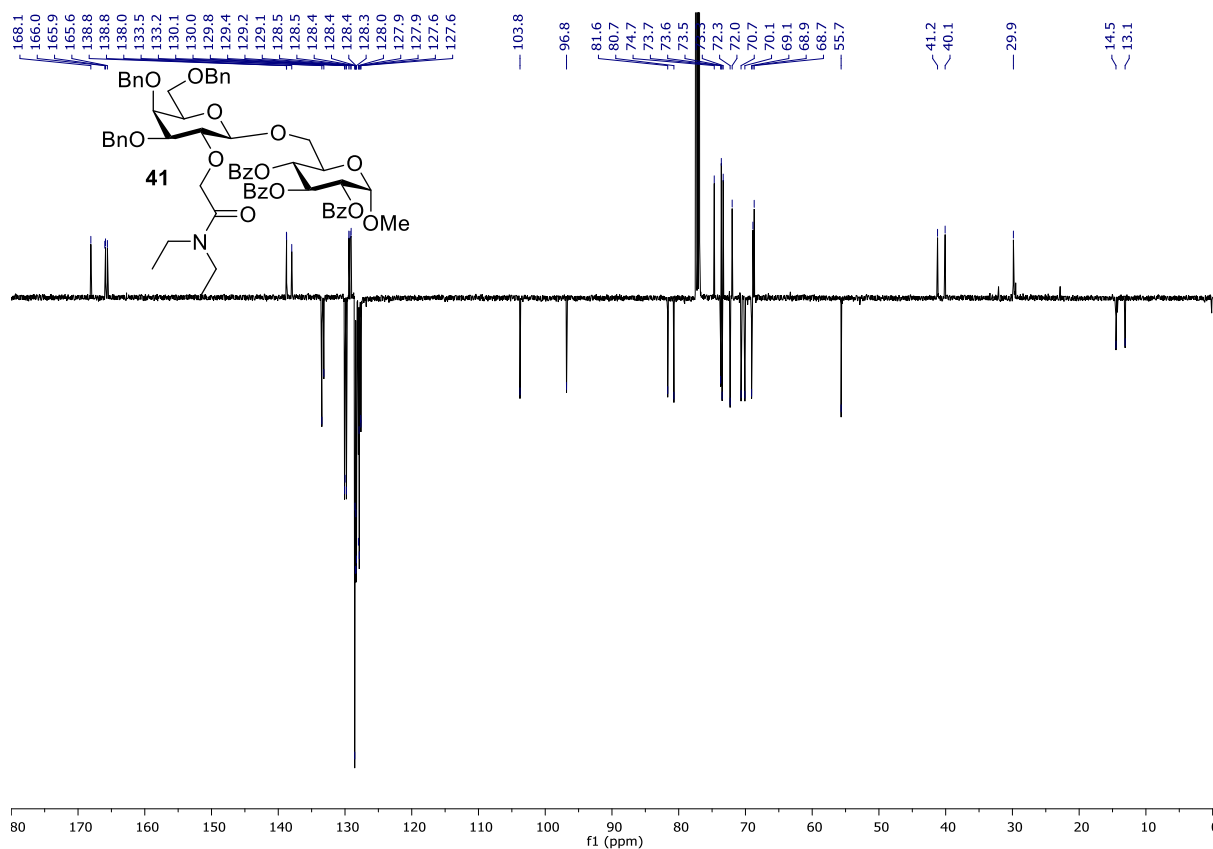





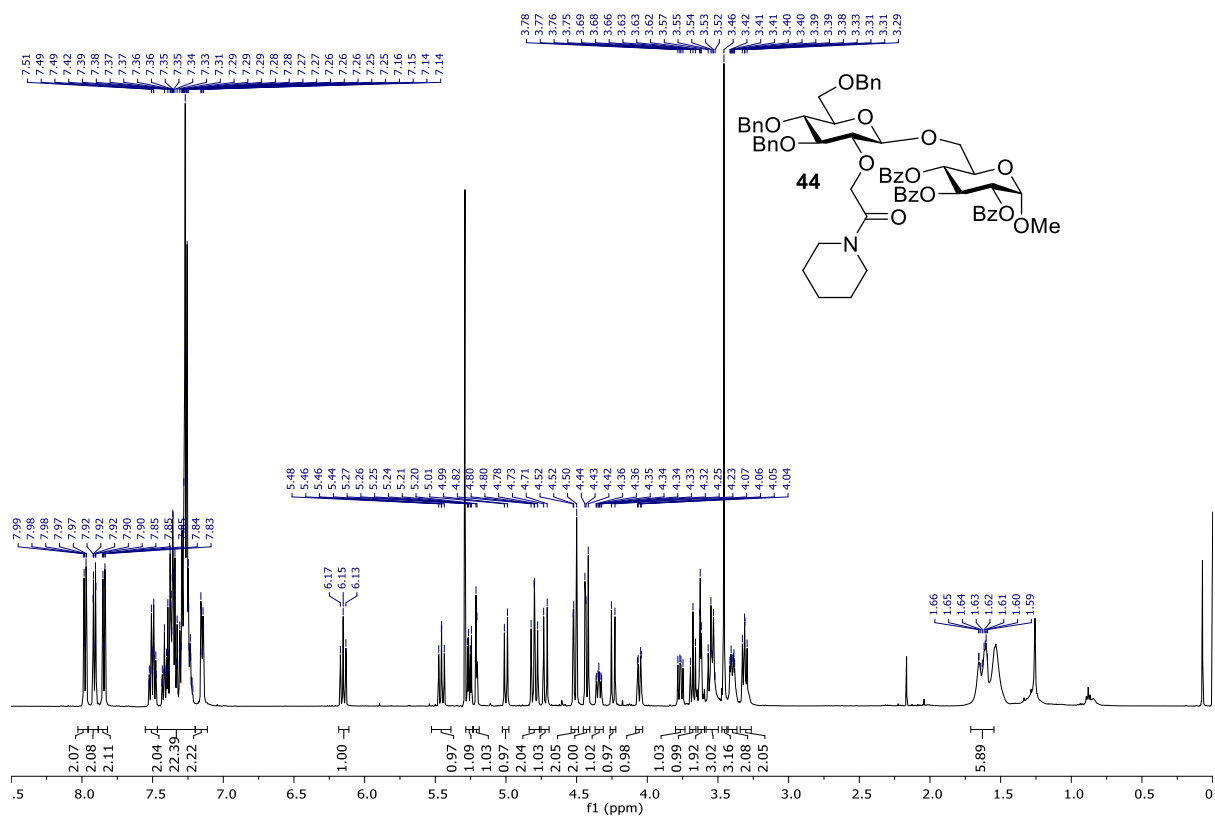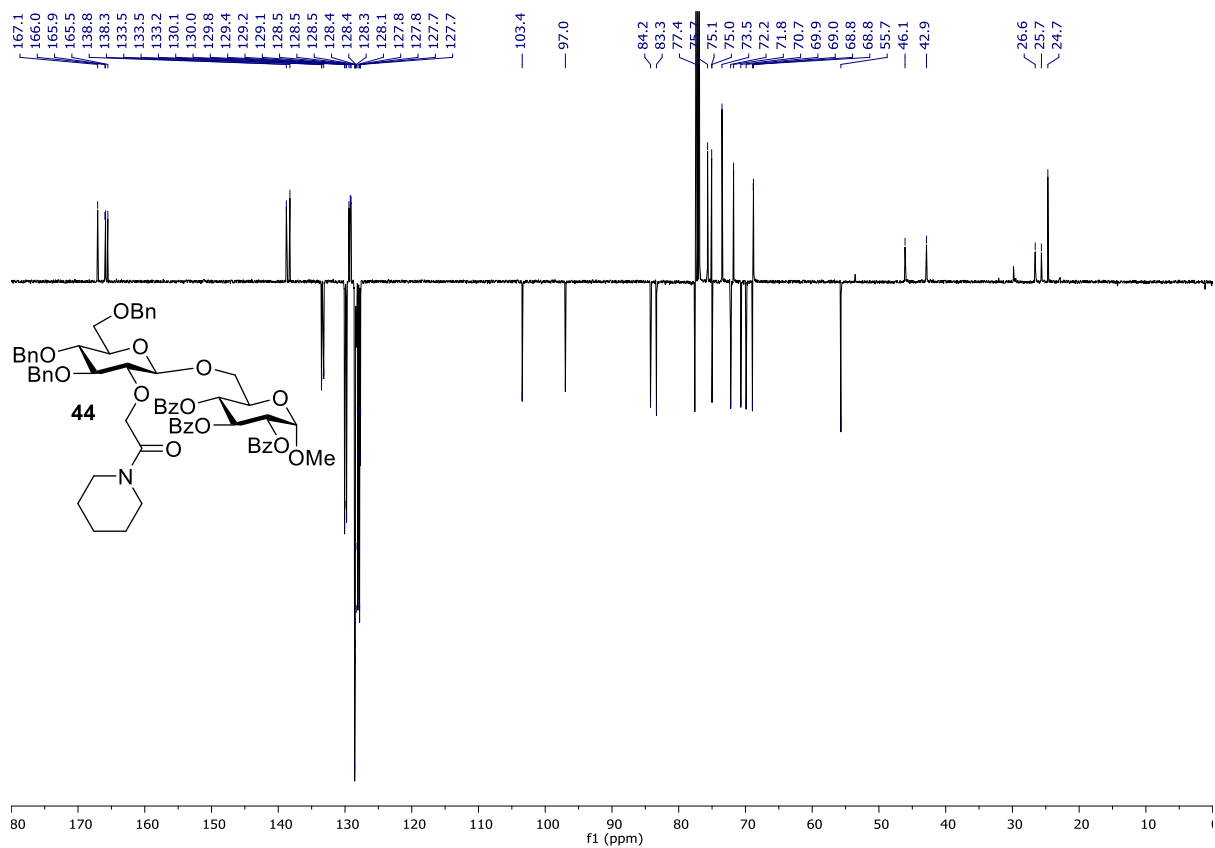

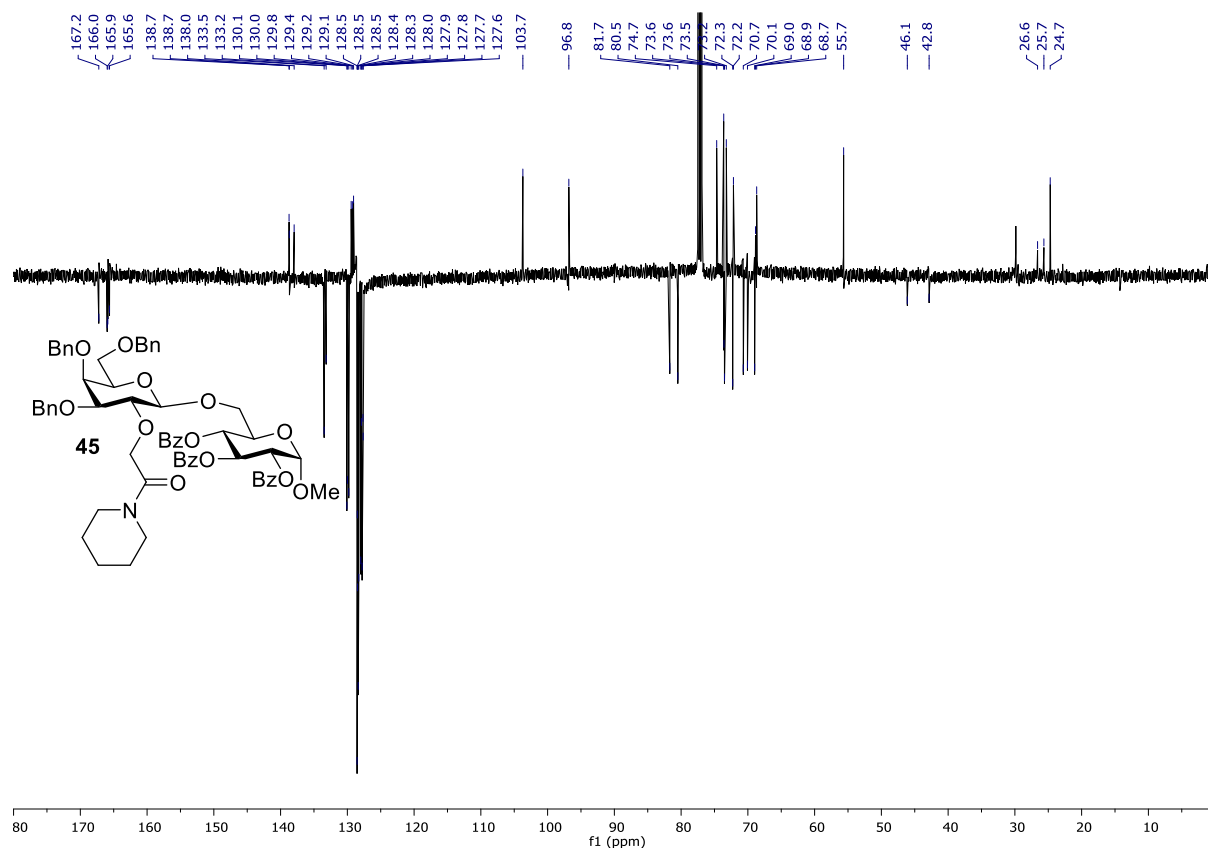

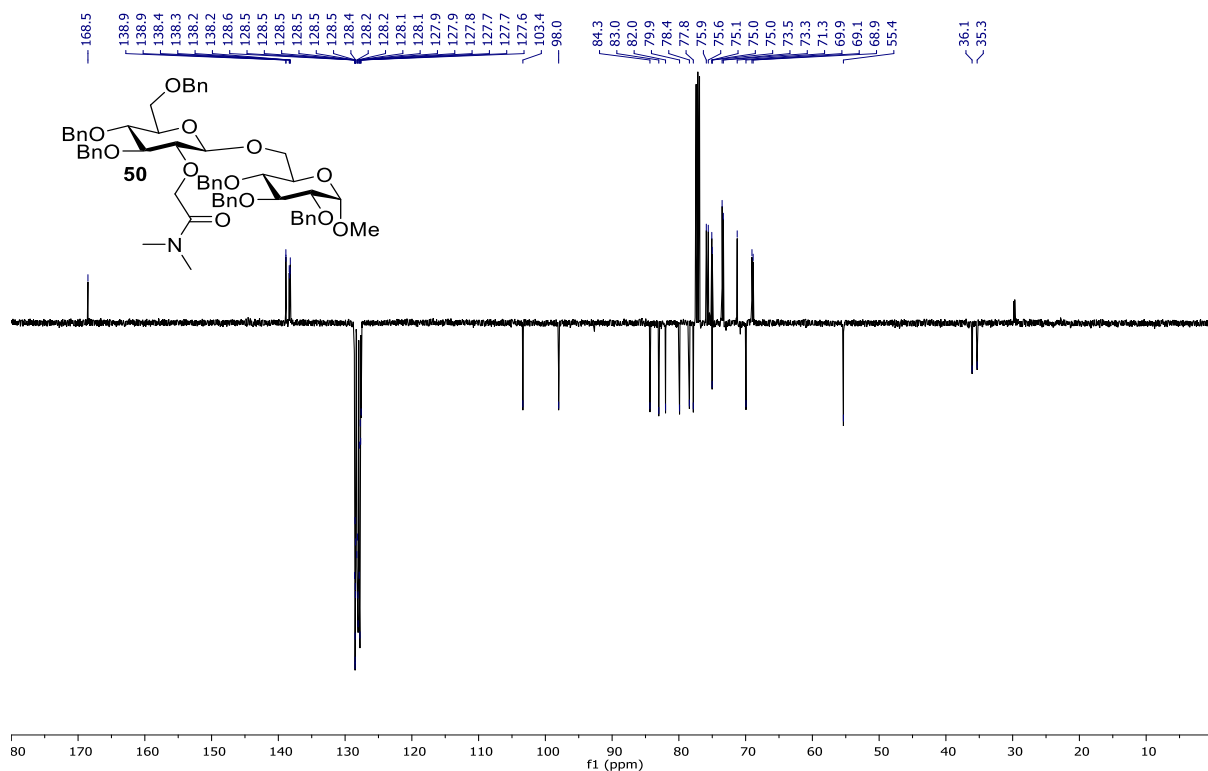



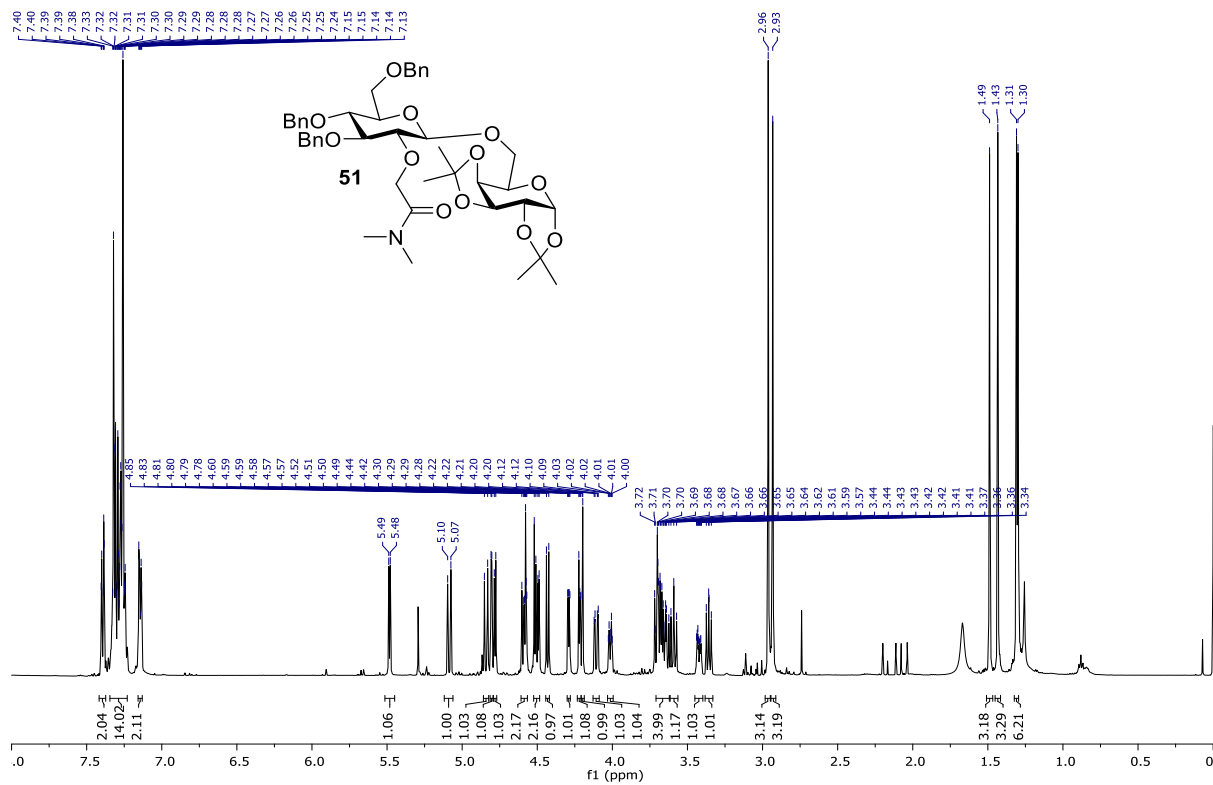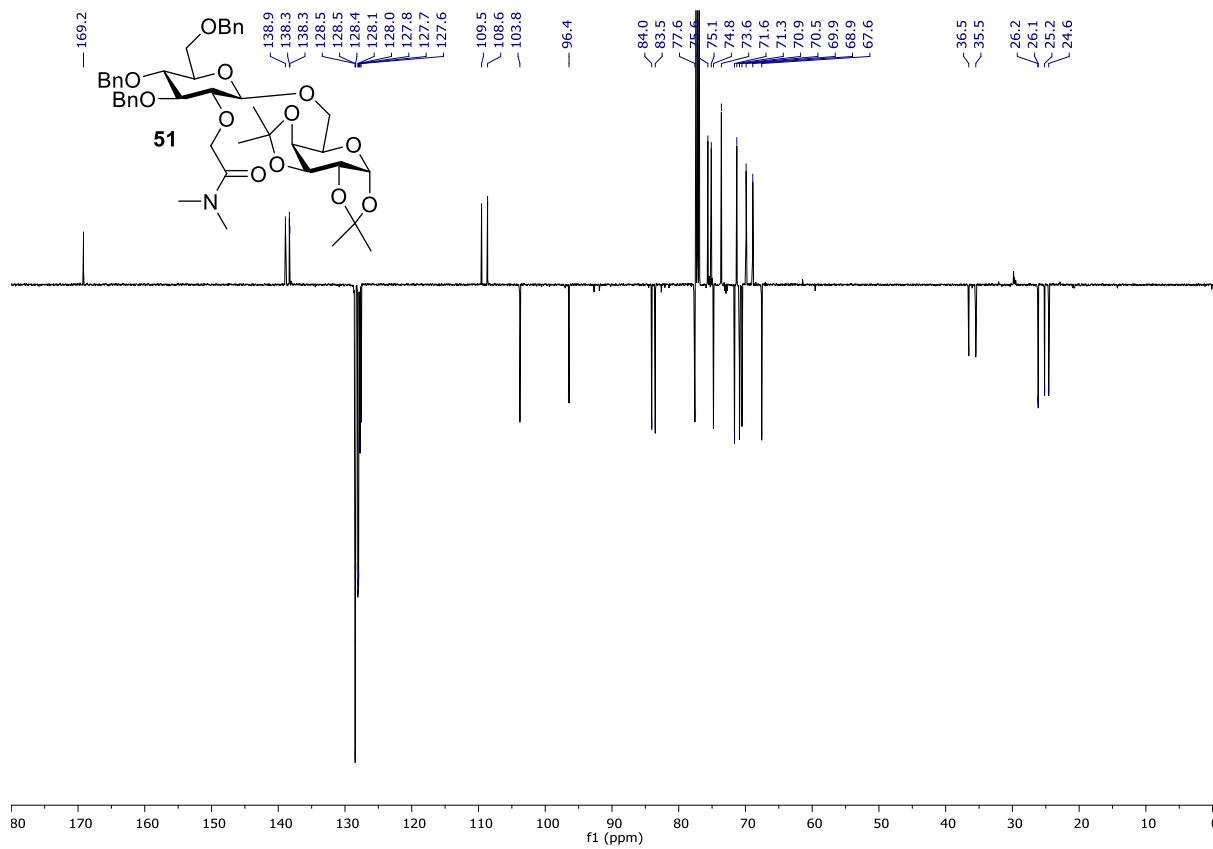

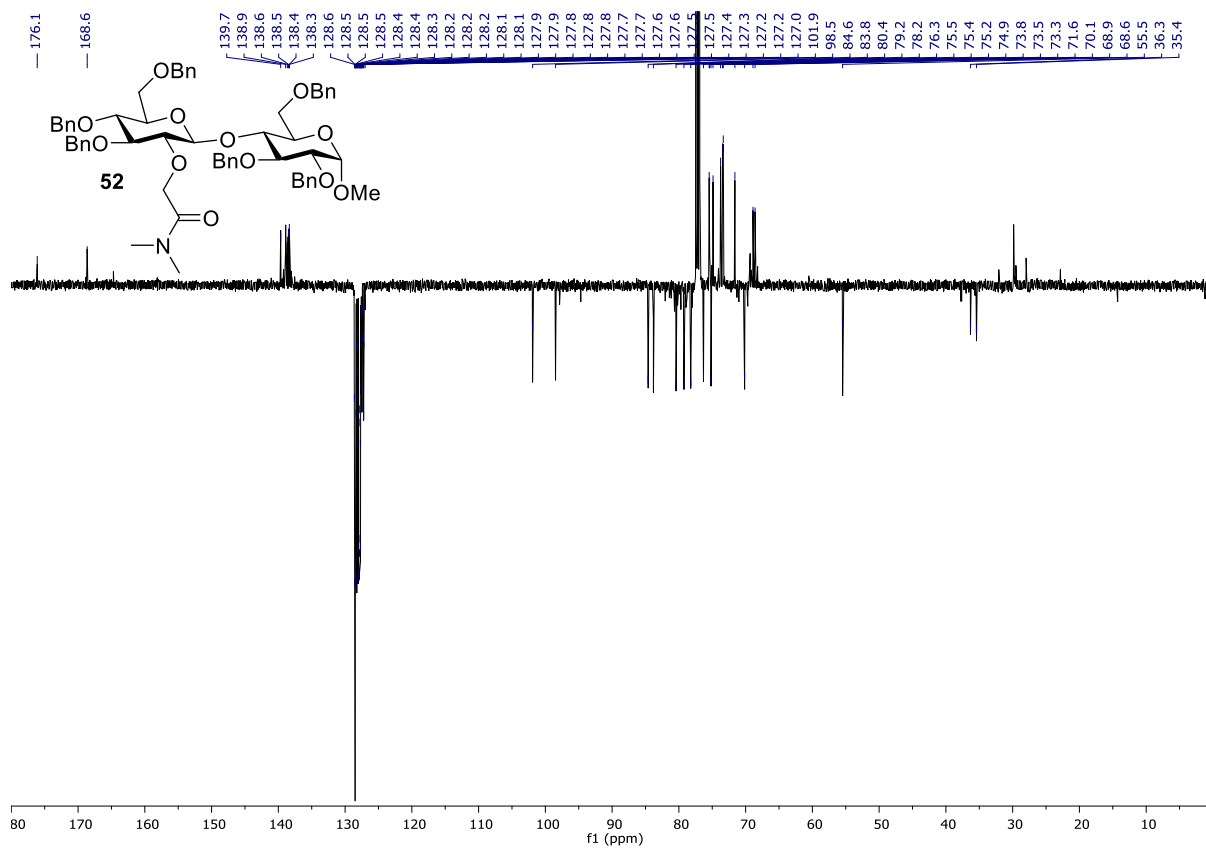

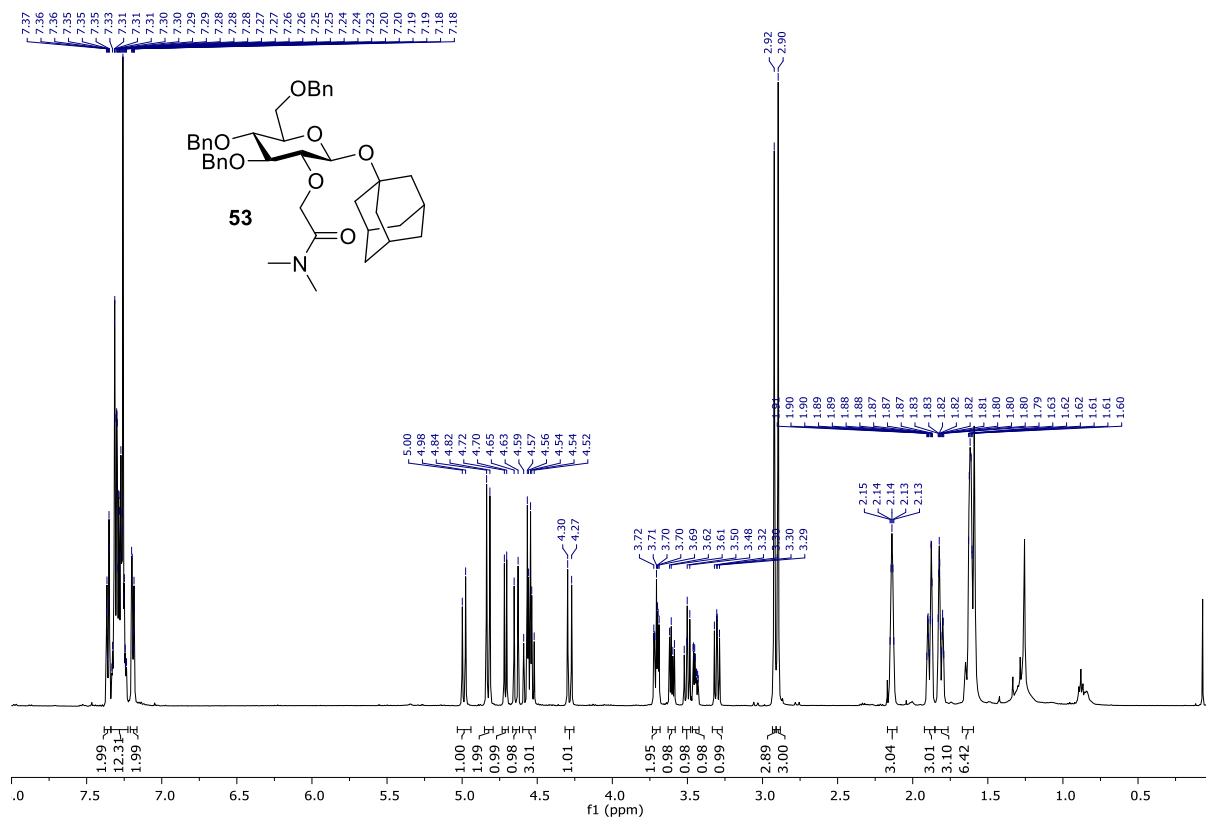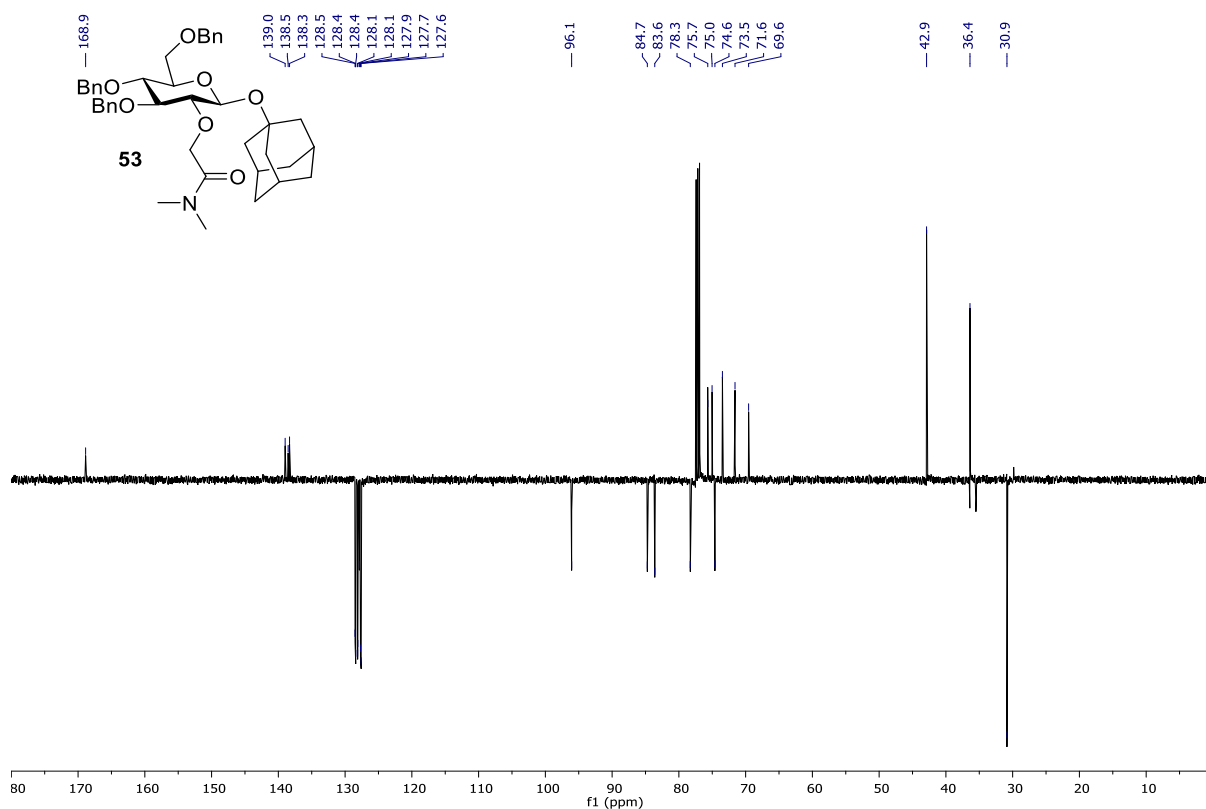





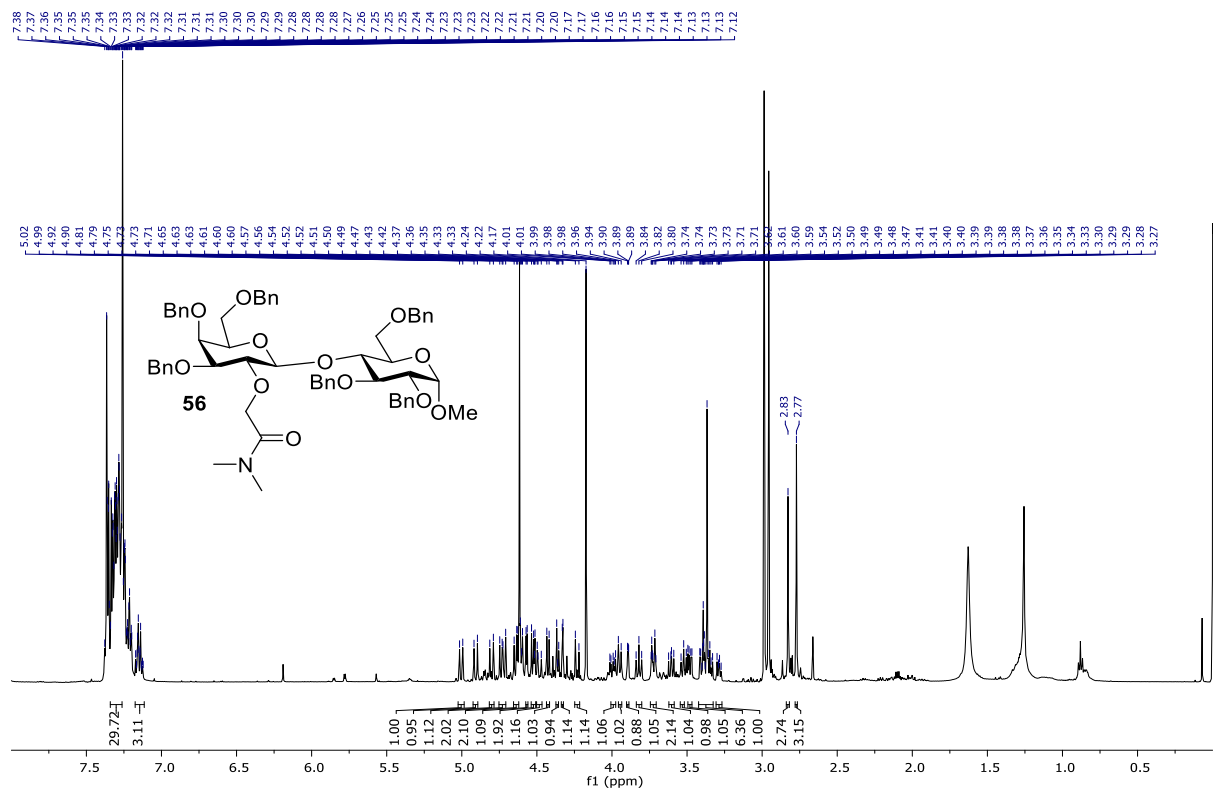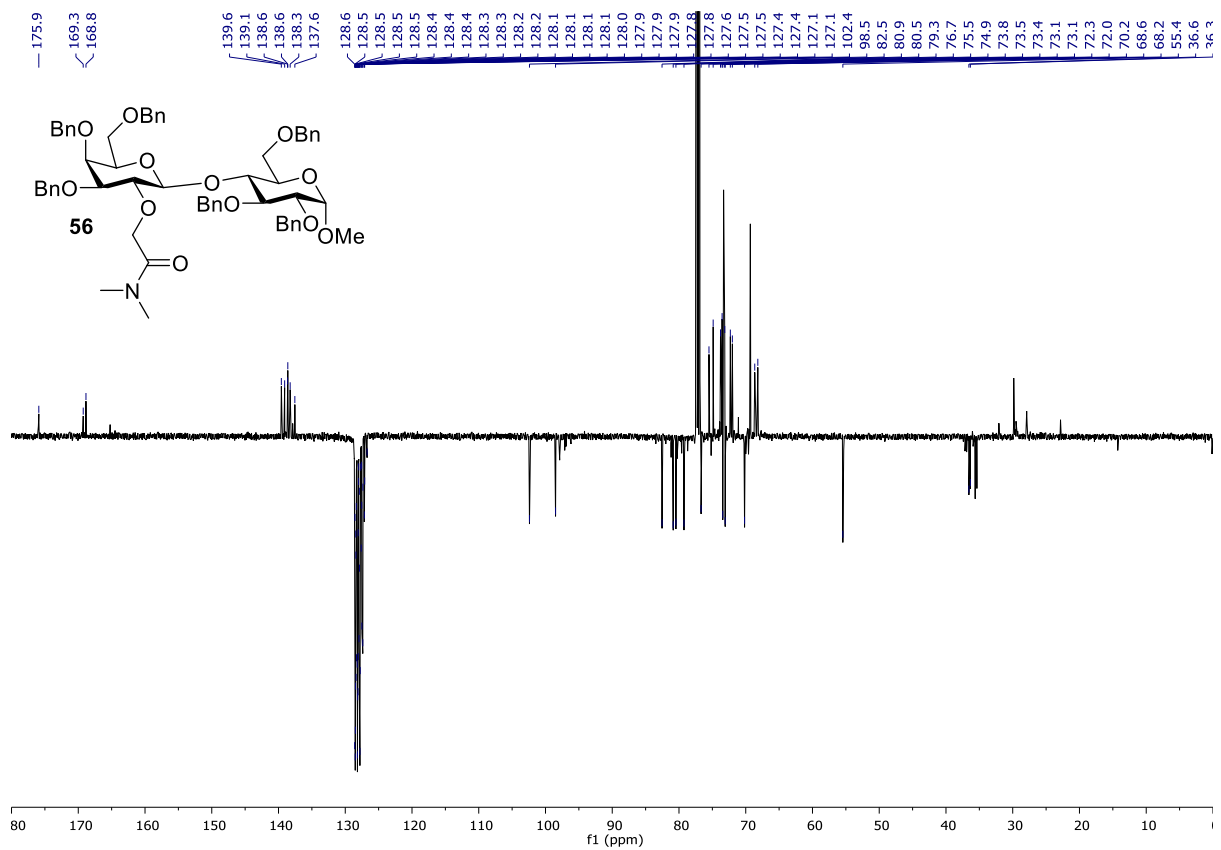

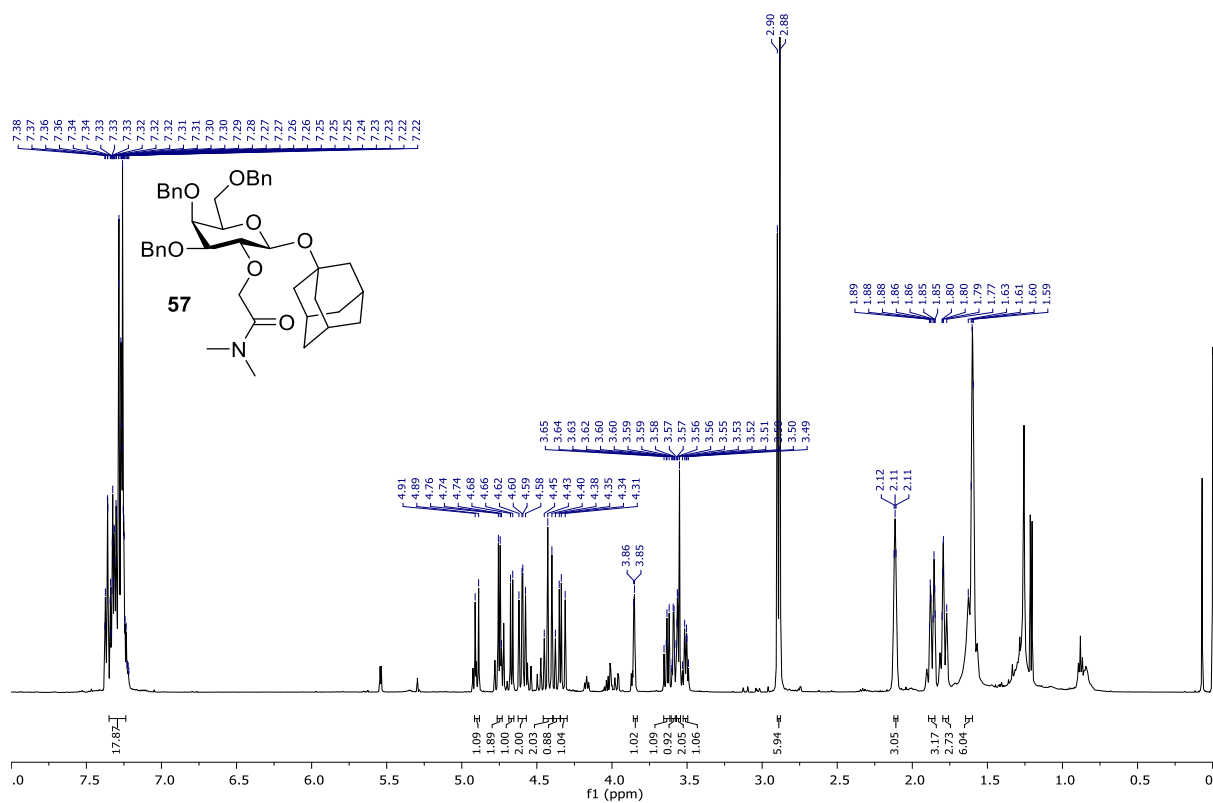

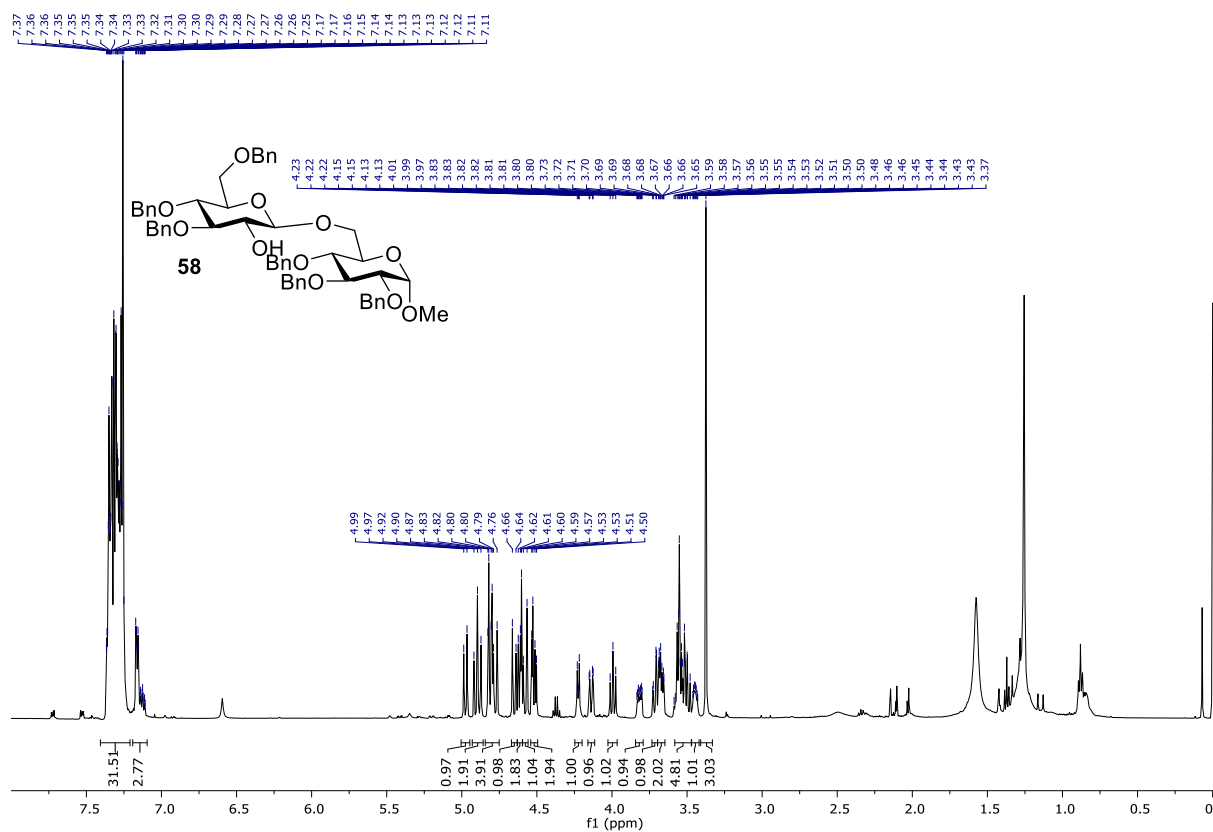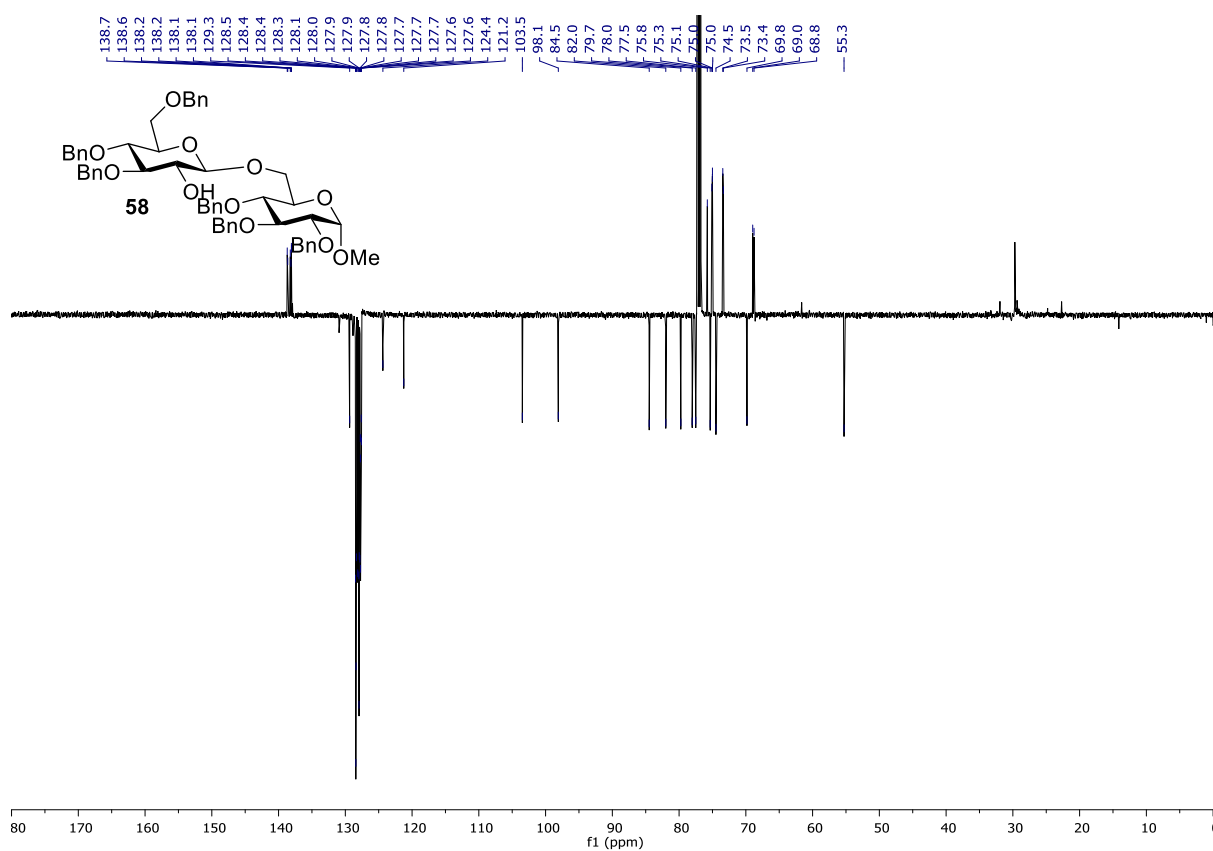



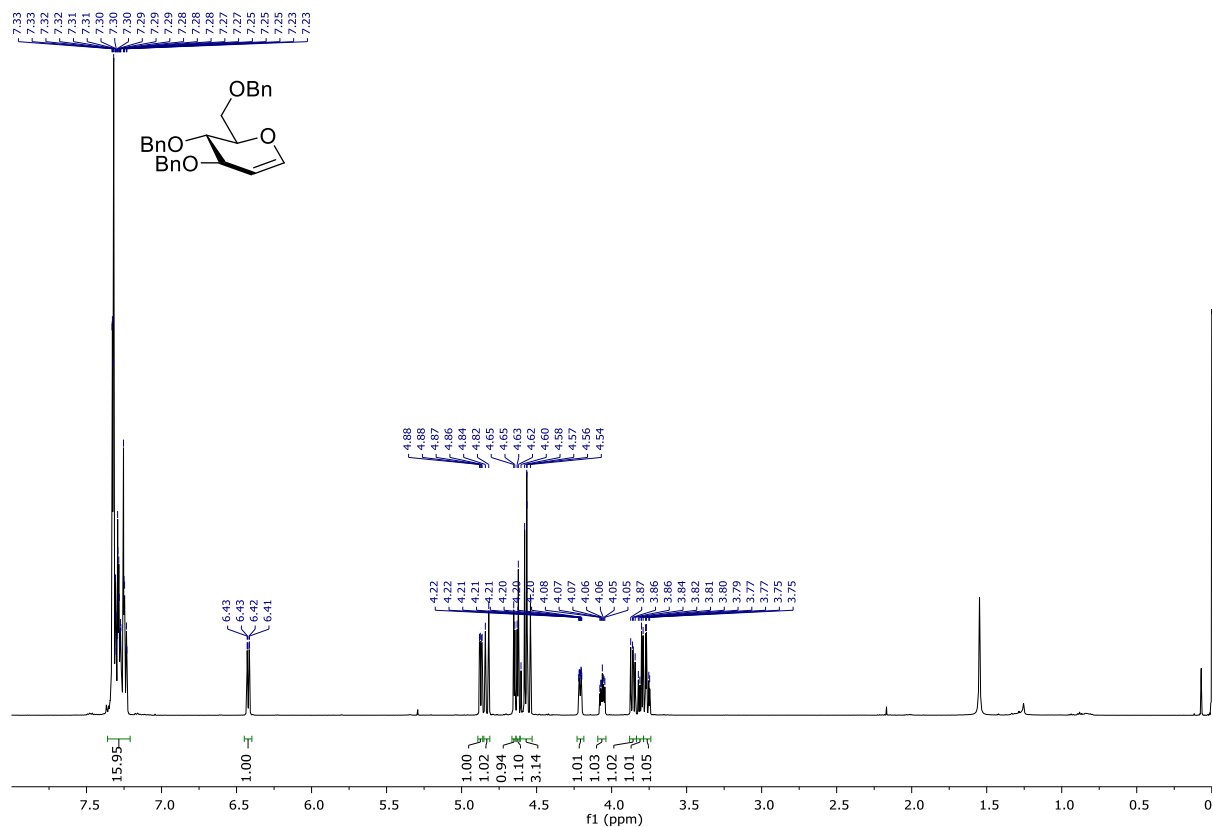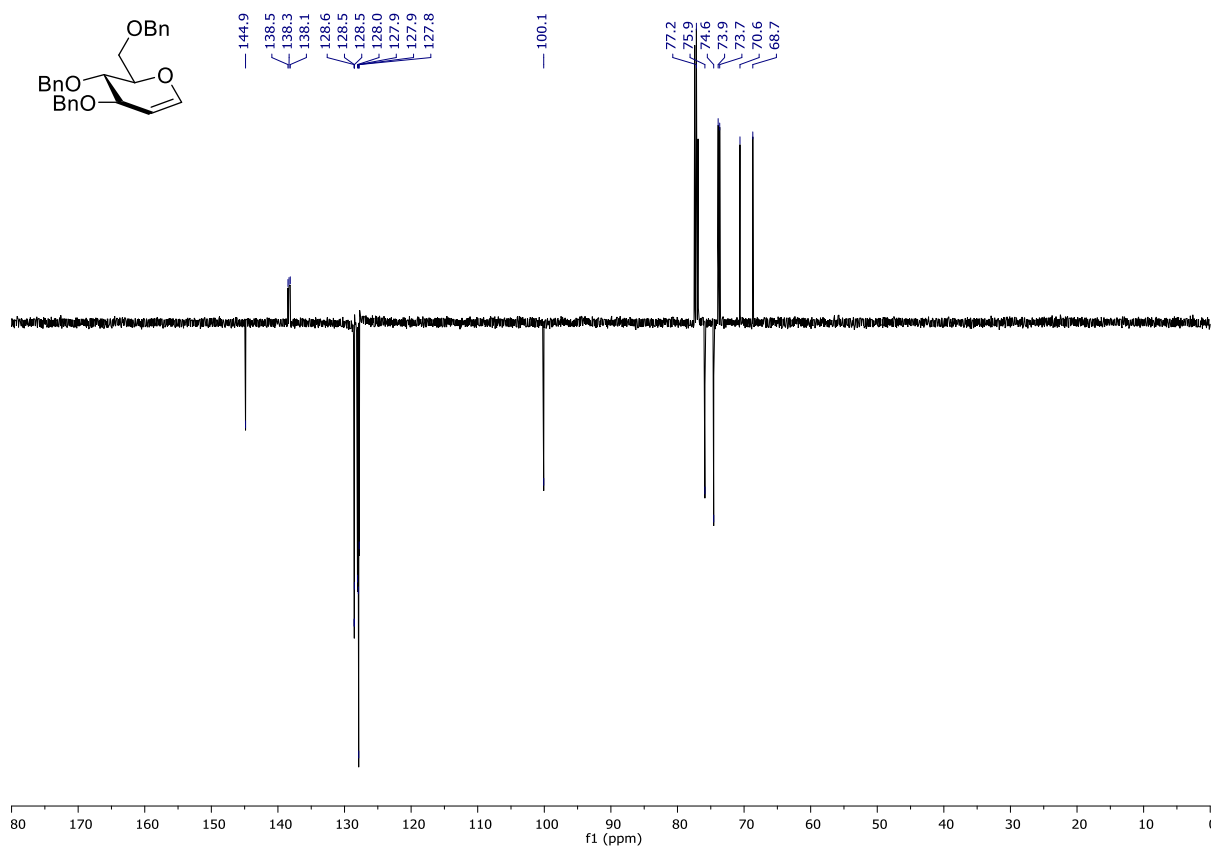

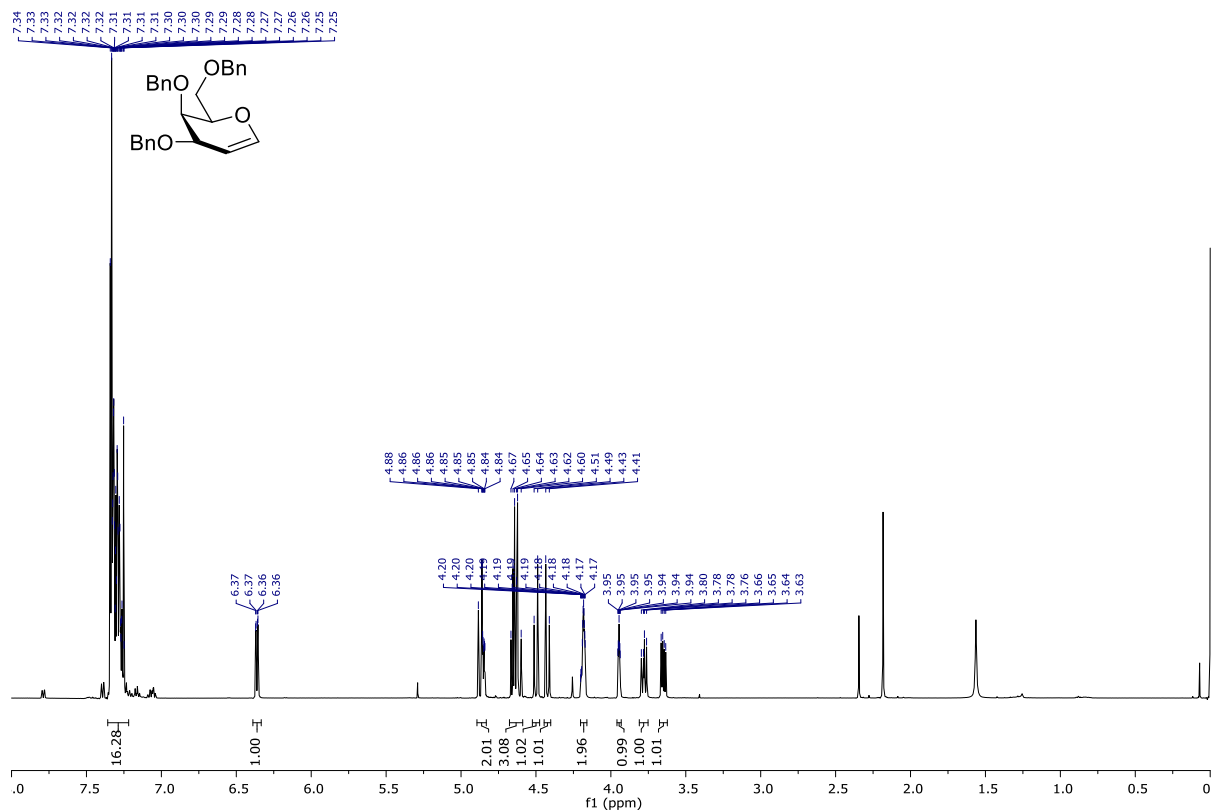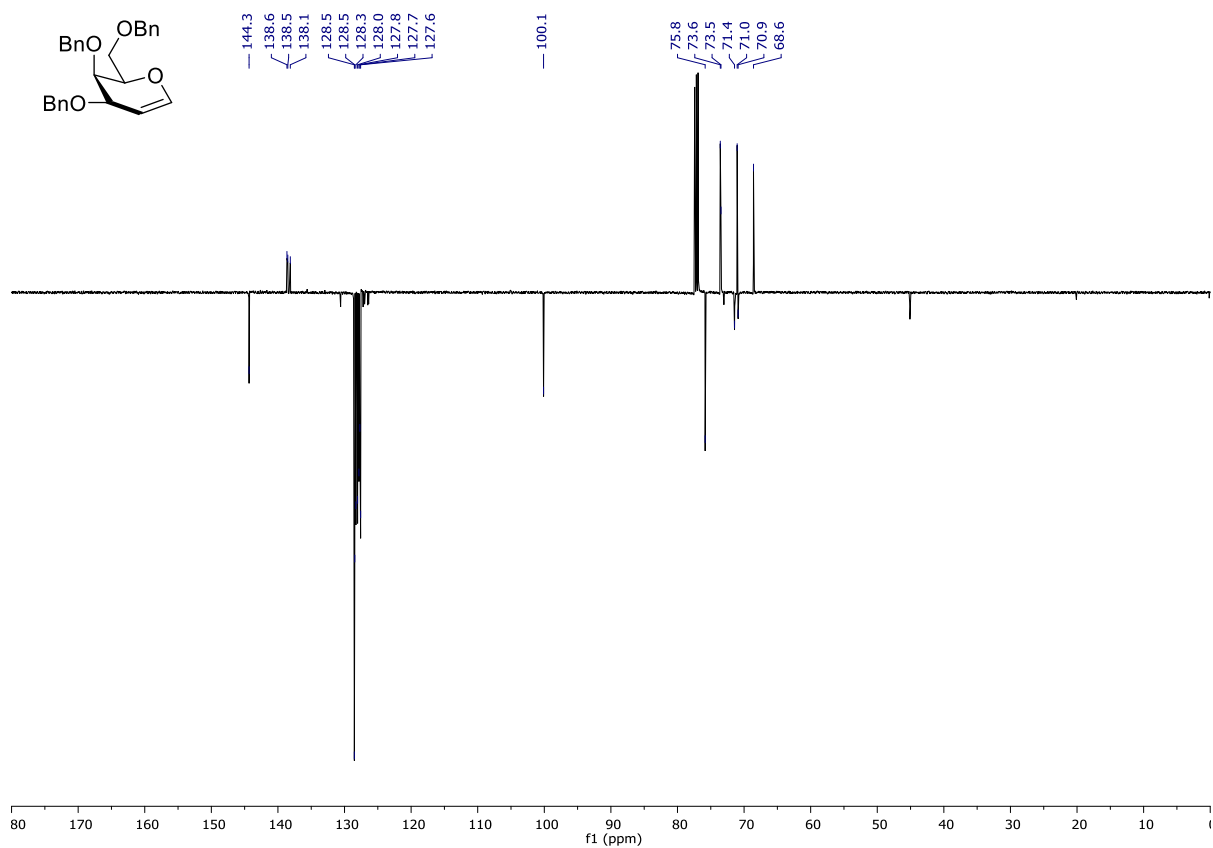

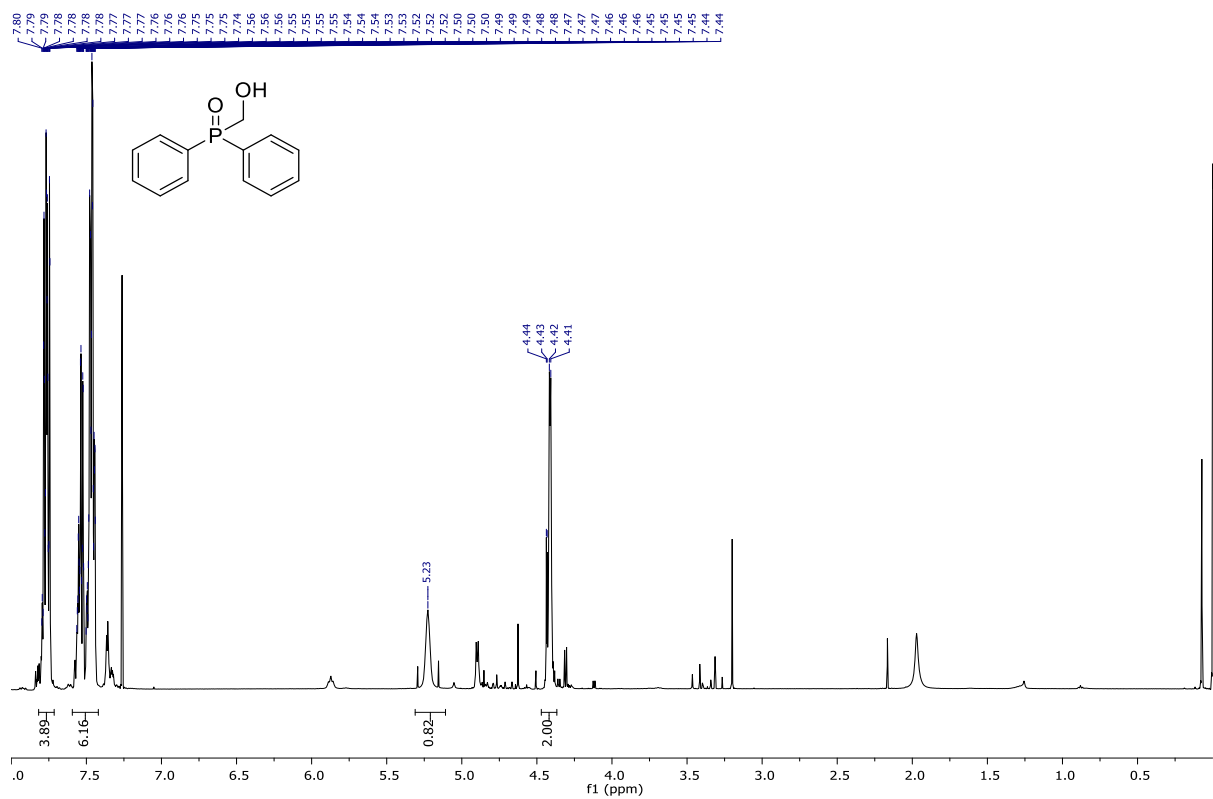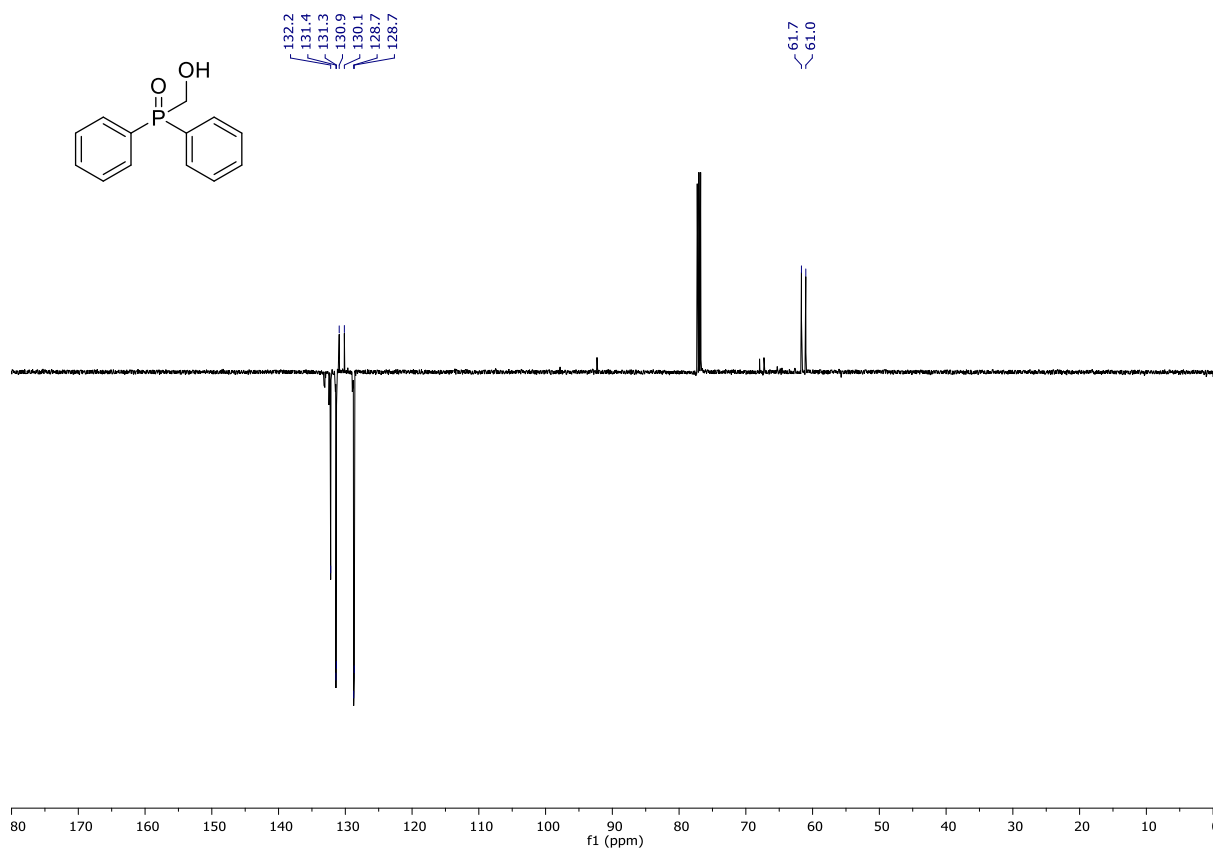

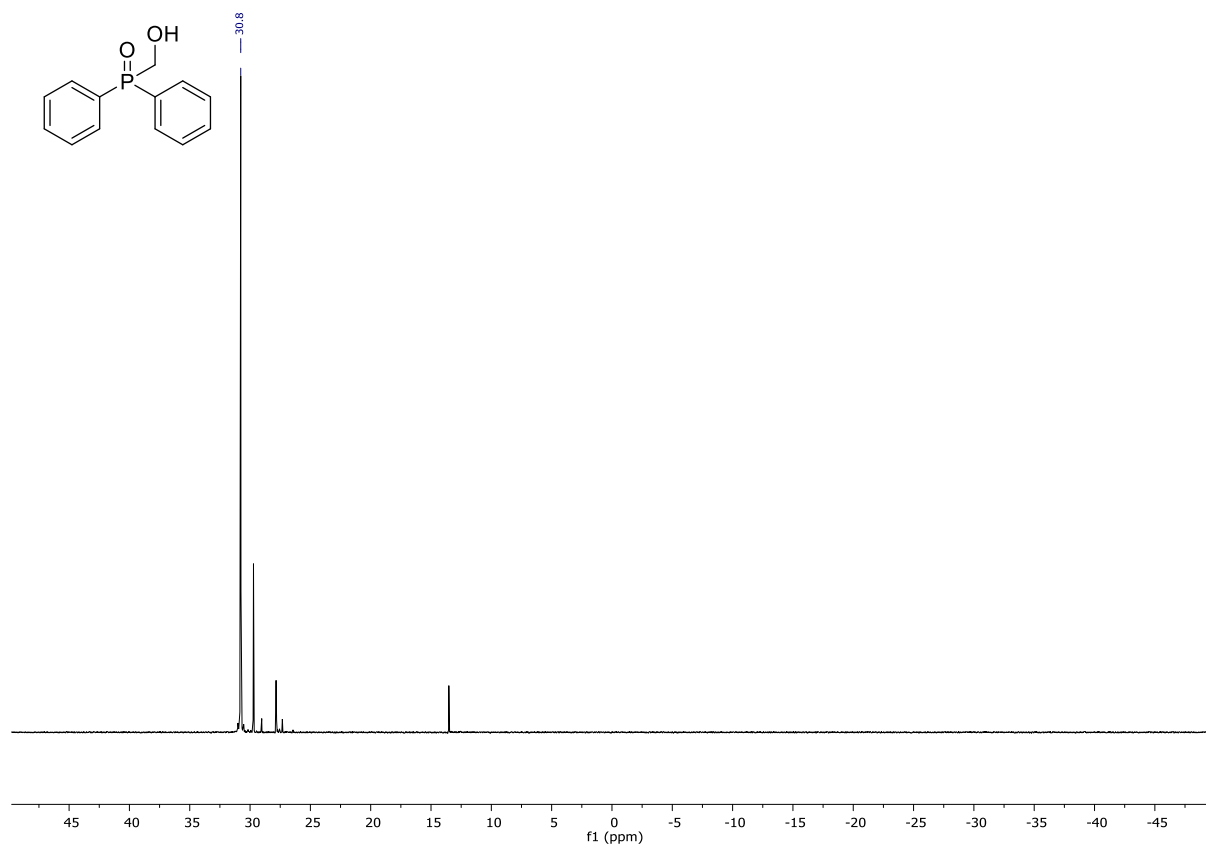

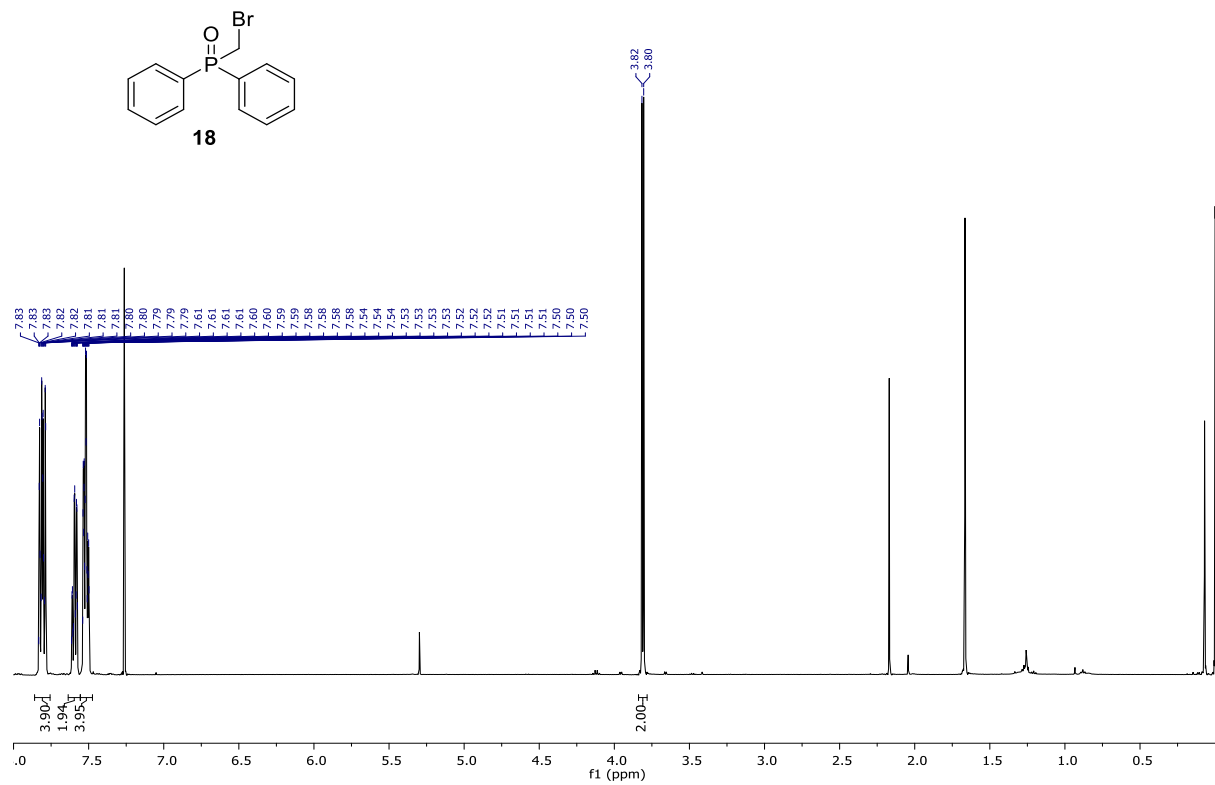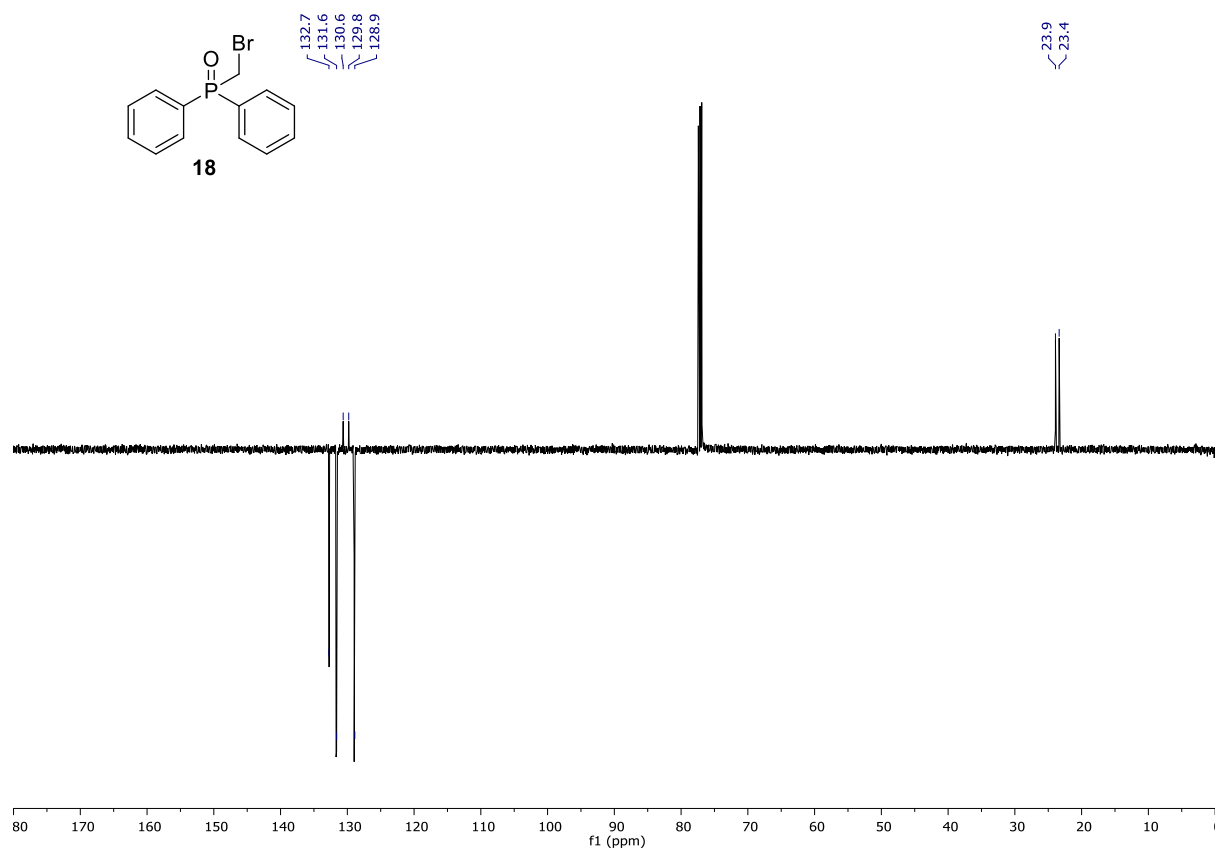

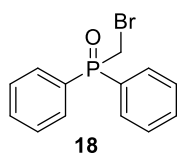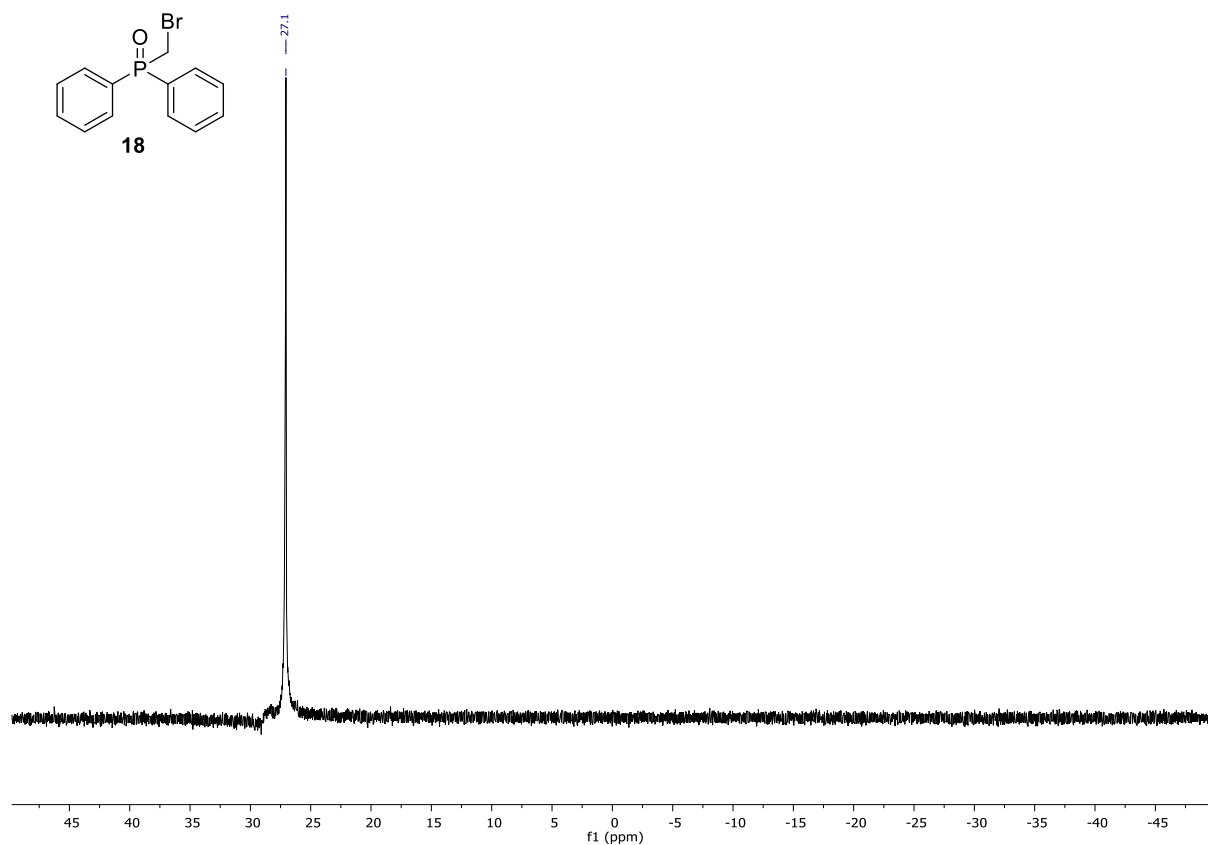

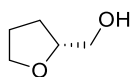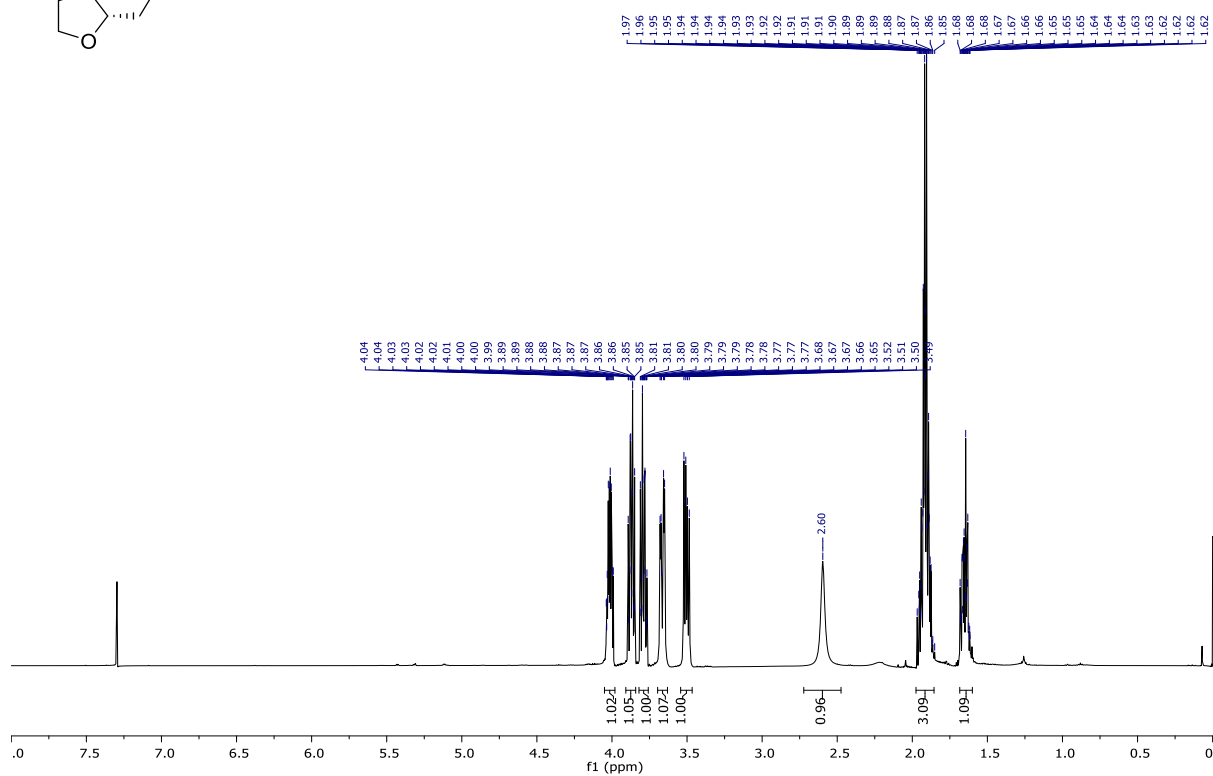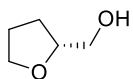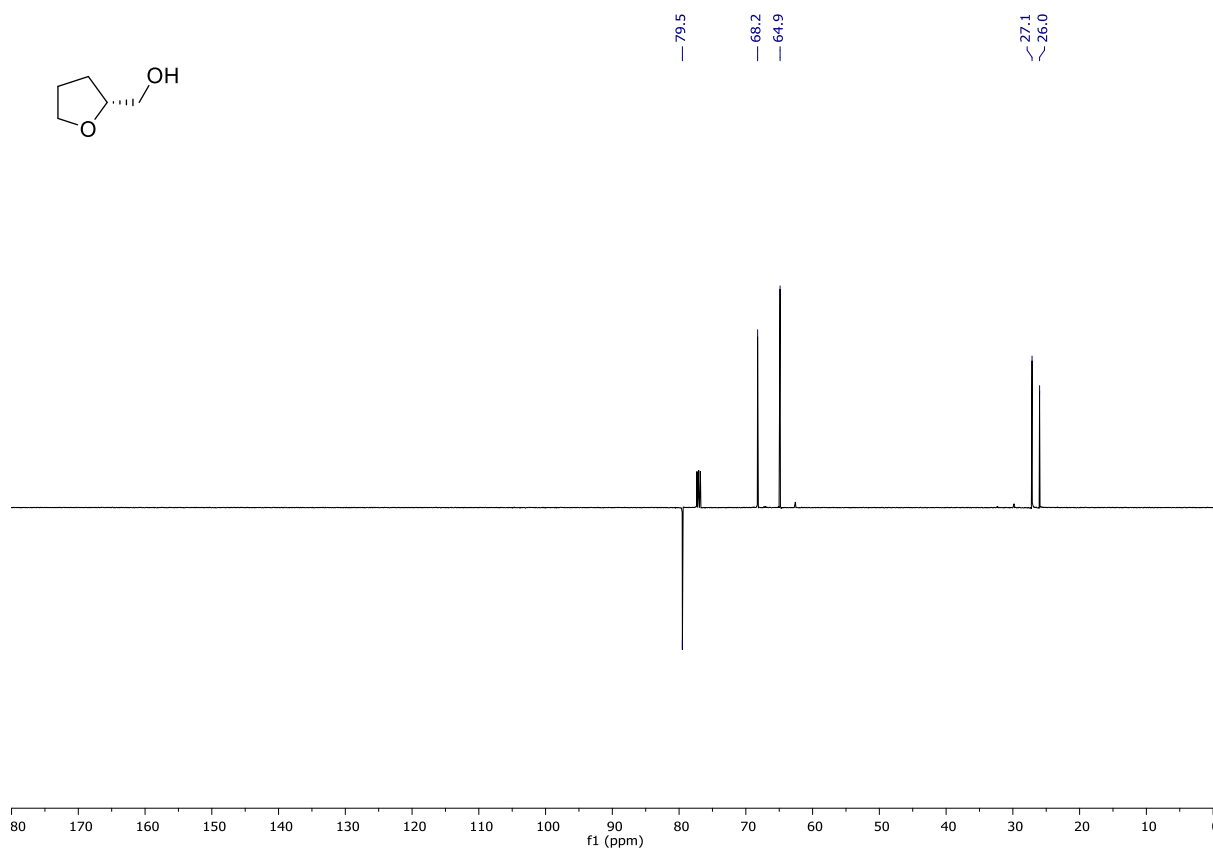

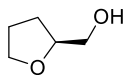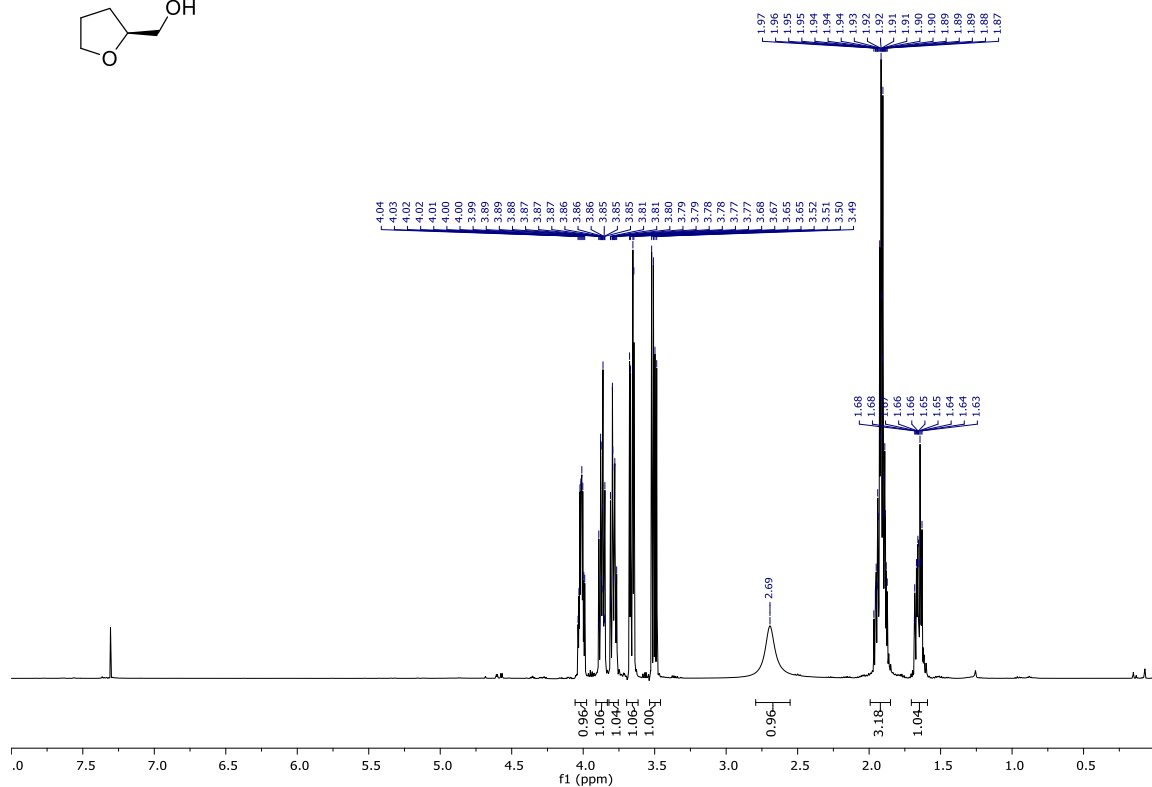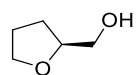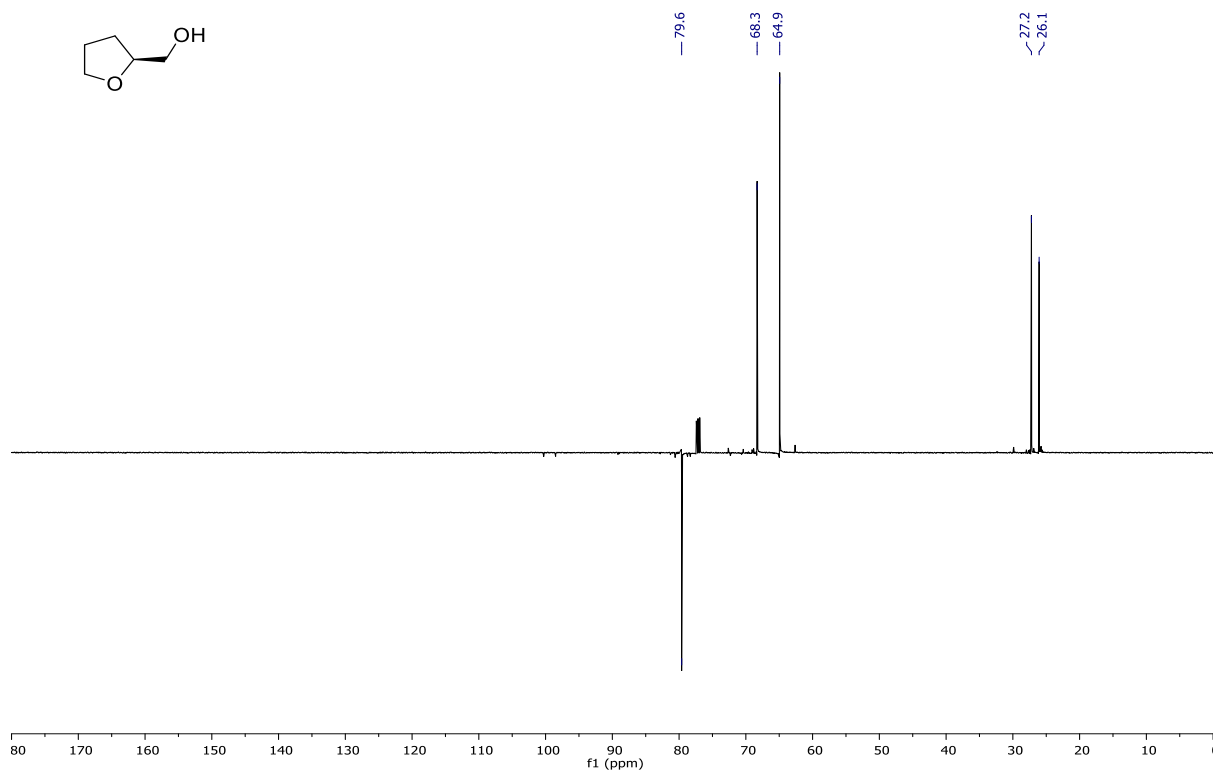



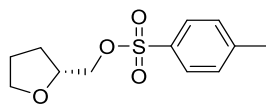

19

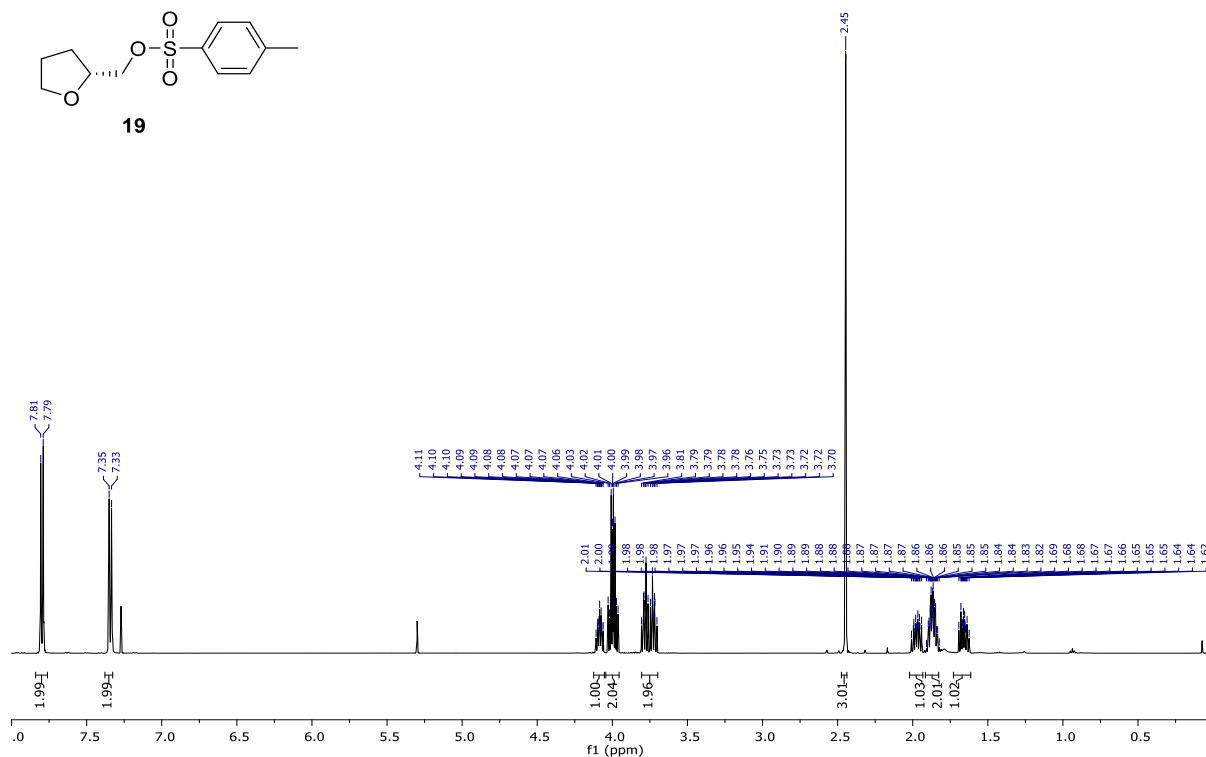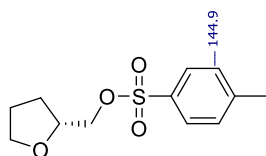

19

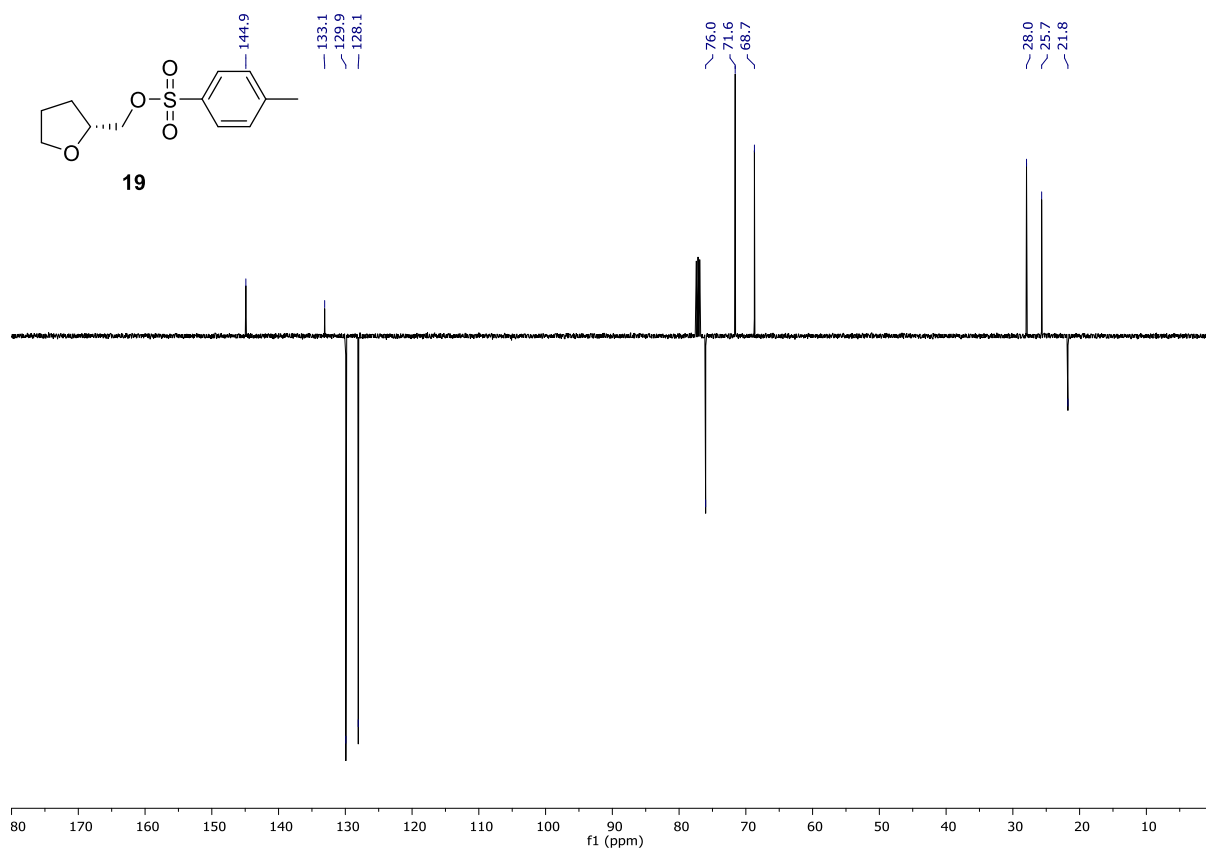

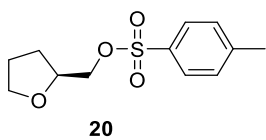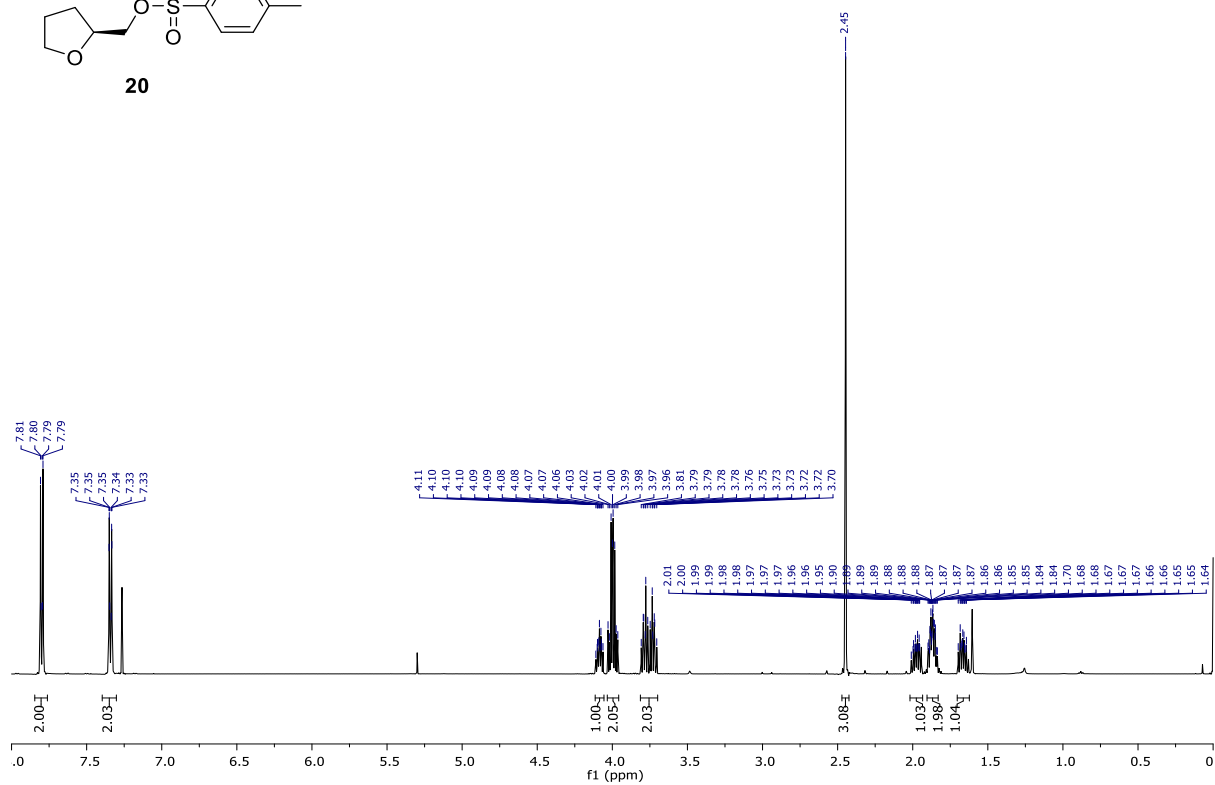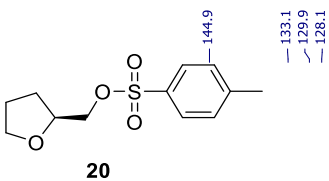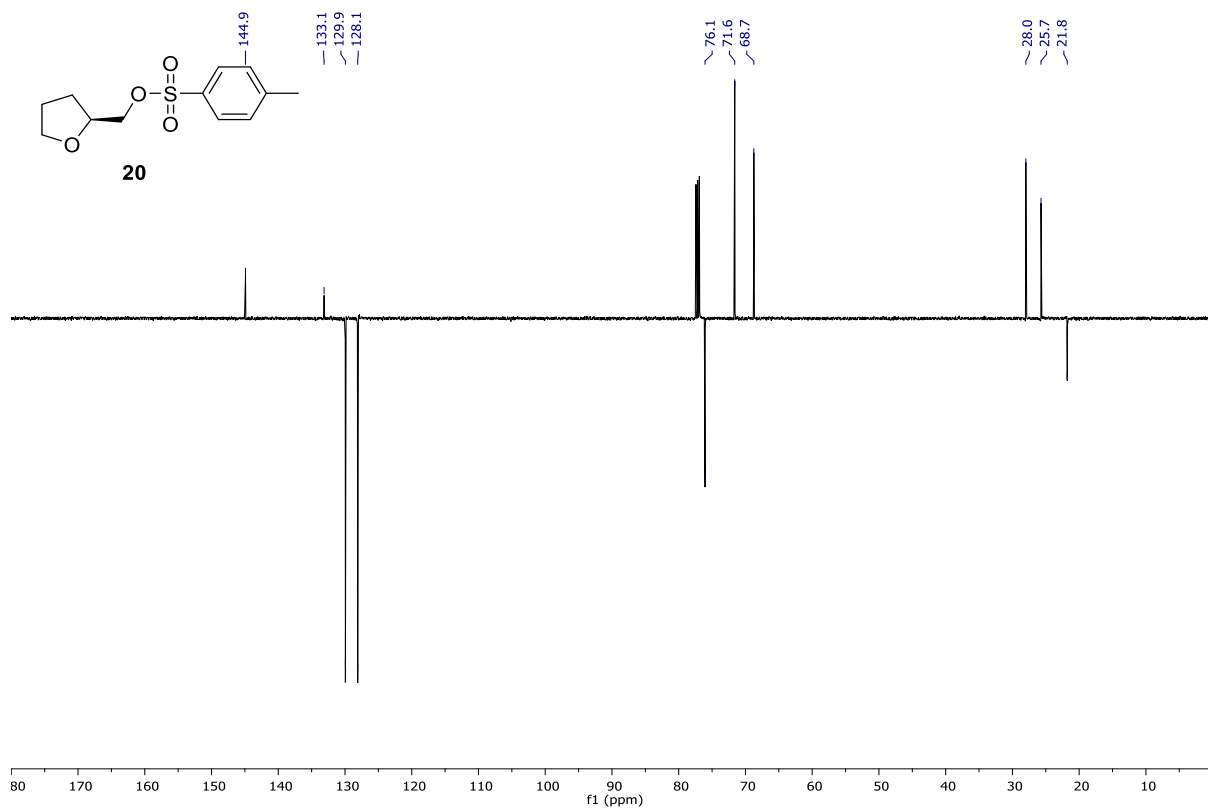

Supplement: c9ob02700a1.pdf [file c9ob02700a1.pdf]
